# Supplementary material for: A highly efficient metal-free hydrocarbonylation of alkynes with propargylamines and water
Source: Royal Society of Chemistry journal article supplement (doi:10.1039/d1gc04487g), 2022-01-01

**Supporting Information for**

**A Highly Efficient Metal-Free Hydrocarbonylation of Alkynes with  
Propargylamines and Water**

Yujuan Xie<sup>a§</sup>, Liliang Huang<sup>a§</sup>, Yayu Qi<sup>a</sup>, Liangliang Song<sup>b\*</sup> and Huangdi Feng<sup>a,c\*</sup>

<sup>a</sup> College of Chemistry and Chemical Engineering, Shanghai University of Engineering Science,  
Shanghai, 201620, China

<sup>b</sup> International Innovation Center for Forest Chemicals and Materials, College of Chemical Engineering,  
Nanjing Forestry University, Nanjing 210037, Jiangsu, China

<sup>c</sup> Shanghai Frontiers Science Research Center for Druggability of Cardiovascular noncoding RNA,  
Institute for Frontier Medical Technology, Shanghai University of Engineering Science, Shanghai,  
201620, China

§Y.X. and L.H. contributed equally to this paper

**Table of Content:**

|                                                                                      |     |
|--------------------------------------------------------------------------------------|-----|
| General Information .....                                                            | S2  |
| General Procedure for the Preparation of Propargylamine.....                         | S3  |
| General Procedure for the Preparation of <b>3</b> and Its Characterization Data..... | S2  |
| Control Experiments and Characterization Data .....                                  | S21 |
| <sup>1</sup> H NMR, <sup>13</sup> C NMR and <sup>19</sup> F NMR spectra .....        | S29 |

## General Information

Unless otherwise noted, all commercial reagents (include part starting compounds 1 and 2) were used directly as purchased. All workup and purification procedures were carried out with reagent-grade solvents that had not been predried under an ambient atmosphere. Thin-layer chromatography (TLC) was performed, and visualization of the compounds was accomplished with UV light (254 nm) or iodine. Products were purified by flash chromatography on silica gel (100-200 mesh). The solvent was removed under reduced pressure, and the residue was purified by column chromatography on silica gel and eluted with petroleum/ethyl acetate to afford the desired product.  $^1\text{H}$  NMR and  $^{13}\text{C}$  NMR spectra were recorded in  $\text{CDCl}_3$  operating at 400 MHz and 100 MHz, respectively. Proton chemical shifts are reported relative to the residual proton signals of the deuterated solvent  $\text{CDCl}_3$  (7.29 ppm) or TMS. Carbon chemical shifts were internally referenced to the deuterated solvent signals in  $\text{CDCl}_3$  (77.10 ppm). Chemical shifts are reported in  $\delta$  (parts per million) values. Coupling constants  $J$  are reported in Hz. Proton coupling patterns were described as singlet (s), doublet (d), triplet (t), quartet (q), and multiple (m). High-resolution mass spectra were recorded on a liquid chromatograph mass spectrometer (LCMS-IT-TOF).

## General Procedure for the Preparation of Propargylamine

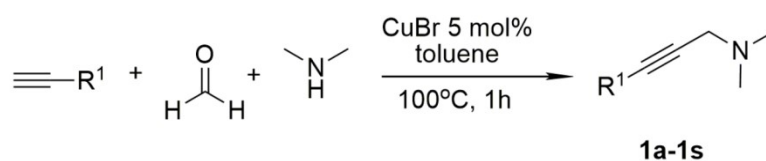

To a dried tube with a stirring bar were added CuBr (7.2 mg, 5 mol%), toluene (1.0 mL), alkyne (1.0 mmol), aldehyde (1.1 mmol), and secondary amine (1.2 mmol). Then the tube was sealed, and placed in a pre-heated oil bath at 100 °C stirring for 1 h. After cooling to room temperature, the solid was removed by filtration of the reaction mixture through a pad of celite. The filtrate was washed sequentially with DCM and dried over  $\text{MgSO}_4$ . The solvent was removed under reduced pressure, and the residue was purified by column chromatography on silica gel and eluted with petroleum/ethyl

acetate (10/1) to afford the desired product **1a-1s**. The analytical data of propargylamines **1a-1s** are shown below.

***N,N*-Dimethyl-3-phenylprop-2-yn-1-amine (1a)**

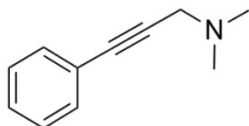

Purified by silica gel column chromatography (10–15% ethyl acetate in petroleum ether) afforded **1a** (147.3 mg, 93% yield) as yellow oil. *Known compound*.<sup>[1]</sup>

<sup>1</sup>H NMR (400 MHz, Chloroform-d)  $\delta$  7.69–7.36 (m, 2H), 7.36–7.20 (m, 3H), 3.46 (s, 2H), 2.36 (s, 6H).

***N,N*-Dimethyl-3-o-tolylprop-2-yn-1-amine (1b)**

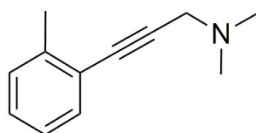

Purified by silica gel column chromatography (10–15% ethyl acetate in petroleum ether) afforded **1b** (175.9 mg, 93% yield) as yellow oil.

<sup>1</sup>H NMR (400 MHz, Chloroform-d)  $\delta$  7.48–7.39 (m, 1H), 7.24–7.17 (m, 2H), 7.17–7.08 (m, 1H), 3.56 (s, 2H), 2.44 (d,  $J = 23.1$  Hz, 9H).

<sup>13</sup>C NMR (100 MHz, CDCl<sub>3</sub>)  $\delta$  140.0, 132.1, 129.4, 128.0, 125.5, 123.1, 84.2, 81.0, 48.6, 44.1, 20.9.

HRMS  $m/z$  (ESI<sup>+</sup>): Calculated for C<sub>12</sub>H<sub>16</sub>N ([M+H]<sup>+</sup>): 174.1277, found 174.1269.

***N,N*-Dimethyl-3-m-tolylprop-2-yn-1-amine (1c)**

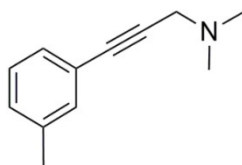

Purified by silica gel column chromatography (10–15% ethyl acetate in petroleum ether) afforded **1c** (161.9 mg, 94% yield) as yellow oil. *Known compound*.<sup>[2]</sup>

<sup>1</sup>H NMR (400 MHz, Chloroform-d)  $\delta$  7.28–7.22 (m, 2H), 7.17 (t,  $J = 7.6$  Hz, 1H), 7.09 (d,  $J = 7.6$  Hz, 1H), 3.45 (s, 2H), 2.33 (d,  $J = 21.3$  Hz, 9H).

### ***N,N*-Dimethyl-3-*p*-tolylprop-2-yn-1-amine (1d)**

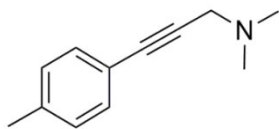

Purified by silica gel column chromatography (10–15% ethyl acetate in petroleum ether) afforded **1d** (161.0 mg, 93% yield) as yellow oil. *Known compound*.<sup>[3]</sup>

**<sup>1</sup>H NMR** (400 MHz, Chloroform-*d*)  $\delta$  7.35 (d,  $J$  = 8.1 Hz, 2H), 7.11 (d,  $J$  = 7.8 Hz, 2H), 3.47 (s, 2H), 2.36 (d,  $J$  = 12.1 Hz, 9H).

### **3-(4-Ethylphenyl)-*N,N*-dimethylprop-2-yn-1-amine (1e)**

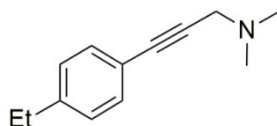

Purified by silica gel column chromatography (10–15% ethyl acetate in petroleum ether) afforded **1e** (168.1 mg, 90% yield) as yellow oil.

**<sup>1</sup>H NMR** (400 MHz, Chloroform-*d*)  $\delta$  7.35 (d,  $J$  = 8.2 Hz, 2H), 7.09 (d,  $J$  = 8.1 Hz, 2H), 3.42 (s, 2H), 2.59 (q,  $J$  = 7.6 Hz, 2H), 2.33 (s, 6H), 1.19 (t,  $J$  = 7.6 Hz, 3H).

**<sup>13</sup>C NMR** (100 MHz, CDCl<sub>3</sub>)  $\delta$  144.2, 131.7, 127.7, 120.5, 85.4, 83.8, 48.6, 44.1, 28.7, 15.3.

**HRMS**  $m/z$  (ESI<sup>+</sup>): Calculated for C<sub>13</sub>H<sub>18</sub>N ([M+H]<sup>+</sup>): 188.1434, found 188.1426.

### **3-(4-Butylphenyl)-*N,N*-dimethylprop-2-yn-1-amine (1f)**

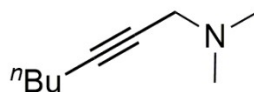

Purified by silica gel column chromatography (10–15% ethyl acetate in petroleum ether) afforded **1f** (189.2 mg, 88% yield) as yellow oil.

**<sup>1</sup>H NMR** (400 MHz, Chloroform-*d*)  $\delta$  7.36 (d,  $J$  = 8.2 Hz, 2H), 7.11 (d,  $J$  = 7.9 Hz, 2H), 3.47 (s, 2H), 2.60 (t,  $J$  = 7.7 Hz, 2H), 2.37 (s, 6H), 1.75–1.51 (m, 2H), 1.45–1.21 (m, 2H), 0.93 (t,  $J$  = 7.3 Hz, 3H).

**<sup>13</sup>C NMR** (100 MHz, CDCl<sub>3</sub>)  $\delta$  143.0, 131.6, 128.3, 120.4, 85.4, 83.8, 48.6, 44.1, 35.5, 33.4, 22.3, 13.9.

**HRMS**  $m/z$  (ESI<sup>+</sup>): Calculated for C<sub>15</sub>H<sub>22</sub>N ([M+H]<sup>+</sup>): 216.1747, found 216.1747.

***N,N*-Dimethyl-3-(4-pentylphenyl)prop-2-yn-1-amine (1g)**

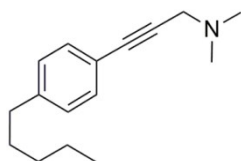

Purified by silica gel column chromatography (10–15% ethyl acetate in petroleum ether) afforded **1g** (190.1 mg, 83% yield) as yellow oil.

**<sup>1</sup>H NMR** (400 MHz, Chloroform-*d*)  $\delta$  7.31 (d,  $J$  = 7.8 Hz, 2H), 7.03 (d,  $J$  = 7.9 Hz, 2H), 3.39 (s, 2H), 2.51 (t,  $J$  = 7.8 Hz, 2H), 2.30 (s, 6H), 1.70–1.42 (m, 2H), 1.37–1.09 (m, 4H), 0.85 (t,  $J$  = 6.9 Hz, 3H).

**<sup>13</sup>C NMR** (100 MHz, CDCl<sub>3</sub>)  $\delta$  142.8, 131.5, 128.2, 120.5, 85.4, 83.8, 48.5, 44.0, 35.7, 31.4, 30.9, 22.5, 13.9.

**HRMS**  $m/z$  (ESI<sup>+</sup>): Calculated for C<sub>16</sub>H<sub>24</sub>N ([M+H]<sup>+</sup>): 230.1903, found 164.1432.

**3-(Biphenyl-4-yl)-*N,N*-dimethylprop-2-yn-1-amine (1h)**

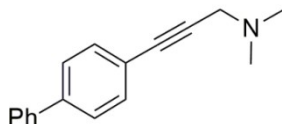

Purified by silica gel column chromatography (10–15% ethyl acetate in petroleum ether) afforded **1h** (187.8 mg, 80% yield) as yellow oil.

**<sup>1</sup>H NMR** (400 MHz, Chloroform-*d*)  $\delta$  7.66–7.52 (m, 6H), 7.49–7.41 (m, 2H), 7.41–7.32 (m, 1H), 3.54 (s, 2H), 2.44 (s, 6H).

**<sup>13</sup>C NMR** (100 MHz, CDCl<sub>3</sub>)  $\delta$  140.8, 140.4, 132.2, 128.9, 127.6, 127.0, 127.0, 122.3, 85.5, 85.3, 48.7, 44.3.

**HRMS**  $m/z$  (ESI<sup>+</sup>): Calculated for C<sub>17</sub>H<sub>18</sub>N ([M+H]<sup>+</sup>): 236.1434, found 236.1434.

**3-(4-Methoxyphenyl)-*N,N*-dimethylprop-2-yn-1-amine (1i)**

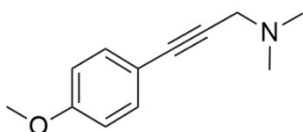

Purified by silica gel column chromatography (10–15% ethyl acetate in petroleum ether) afforded **1i** (181.4 mg, 96% yield) as yellow oil. *Known compound*.<sup>[5]</sup>

<sup>1</sup>H NMR (400 MHz, Chloroform-d)  $\delta$  7.33–7.27 (m, 2H), 6.77–6.68 (m, 2H), 3.65 (s, 3H), 3.36 (s, 2H), 2.27 (s, 6H).

### 3-(3-Methoxyphenyl)-*N,N*-dimethylprop-2-yn-1-amine (**1j**)

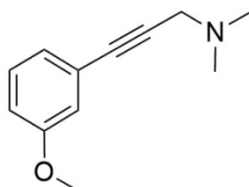

Purified by silica gel column chromatography (10–15% ethyl acetate in petroleum ether) afforded **1j** (179.6 mg, 95% yield) as yellow oil. *Known compound*.<sup>[4]</sup>

<sup>1</sup>H NMR (400 MHz, Chloroform-d)  $\delta$  7.20–7.12 (m, 1H), 7.06–7.00 (m, 1H), 6.97–6.91 (m, 1H), 6.84–6.79 (m, 1H), 3.74 (s, 3H), 3.43 (s, 2H), 2.33 (s, 6H).

### 3-(2-Fluorophenyl)-*N,N*-dimethylprop-2-yn-1-amine (**1k**)

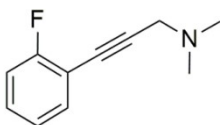

Purified by silica gel column chromatography (10–15% ethyl acetate in petroleum ether) afforded **1k** (154.1 mg, 87% yield) as yellow oil. *Known compound*.<sup>[6]</sup>

<sup>1</sup>H NMR (400 MHz, Chloroform-d)  $\delta$  7.53–7.35 (m, 1H), 7.33–7.19 (m, 1H), 7.13–6.98 (m, 2H), 3.51 (s, 2H), 2.37 (s, 6H).

### 3-(3-Fluorophenyl)-*N,N*-dimethylprop-2-yn-1-amine (**1l**)

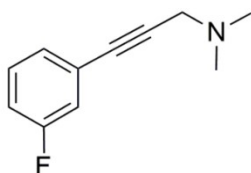

Purified by silica gel column chromatography (10–15% ethyl acetate in petroleum ether) afforded **1l** (150.9 mg, 85% yield) as yellow oil. *Known compound*.<sup>[7]</sup>

<sup>1</sup>H NMR (400 MHz, Chloroform-d)  $\delta$  7.29–7.18 (m, 2H), 7.15–7.09 (m, 1H), 7.04–6.92 (m, 1H), 3.45 (s, 2H), 2.35 (s, 6H).

### 3-(4-Fluorophenyl)-*N,N*-dimethylprop-2-yn-1-amine (**1m**)

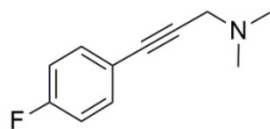

Purified by silica gel column chromatography (10–15% ethyl acetate in petroleum ether) afforded **1m** (152.4 mg, 86% yield) as yellow oil. *Known compound*.<sup>[3]</sup>

<sup>1</sup>H NMR (400 MHz, Chloroform-d) δ 7.48–7.26 (m, 2H), 7.05–6.78 (m, 2H), 3.40 (s, 2H), 2.31 (s, 6H).

### 3-(3-Chlorophenyl)-*N,N*-dimethylprop-2-yn-1-amine (**1n**)

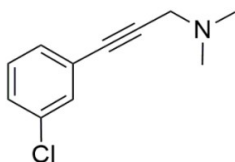

Purified by silica gel column chromatography (10–15% ethyl acetate in petroleum ether) afforded **1n** (146.5 mg, 76% yield) as yellow oil.

<sup>1</sup>H NMR (400 MHz, Chloroform-d) δ 7.60–7.02 (m, 4H), 3.37 (s, 2H), 2.27 (s, 6H).

<sup>13</sup>C NMR (100 MHz, CDCl<sub>3</sub>) δ 134.0, 131.5, 129.7, 129.3, 128.2, 125.0, 86.1, 83.9, 48.4, 44.1.

HRMS m/z (ESI<sup>+</sup>): Calculated for C<sub>11</sub>H<sub>13</sub>ClN ([M+H]<sup>+</sup>): 194.0731, found 194.0731.

### 3-(2-Bromophenyl)-*N,N*-dimethylprop-2-yn-1-amine (**1o**)

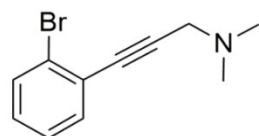

Purified by silica gel column chromatography (10–15% ethyl acetate in petroleum ether) afforded **1o** (191.7 mg, 81% yield) as yellow oil.

<sup>1</sup>H NMR (400 MHz, Chloroform-d) δ 7.68–7.51 (m, 1H), 7.51–7.41 (m, 1H), 7.33–7.18 (m, 1H), 7.17–7.03 (m, 1H), 3.54 (s, 2H), 2.40 (s, 6H).

<sup>13</sup>C NMR (100 MHz, CDCl<sub>3</sub>) δ 133.5, 132.3, 129.1, 126.9, 125.4, 89.6, 83.9, 48.5, 44.1.

HRMS m/z (ESI<sup>+</sup>): Calculated for C<sub>11</sub>H<sub>13</sub>BrN ([M+H]<sup>+</sup>): 238.0226, found 238.0226.

### 3-(3-Bromophenyl)-*N,N*-dimethylprop-2-yn-1-amine (1p)

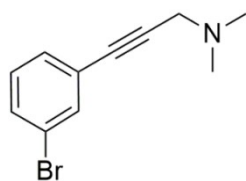

Purified by silica gel column chromatography (10–15% ethyl acetate in petroleum ether) afforded **1p** (189.4 mg, 80% yield) as yellow oil.

<sup>1</sup>H NMR (400 MHz, Chloroform-d)  $\delta$  7.50 (d,  $J = 1.9$  Hz, 1H), 7.40–7.21 (m, 2H), 7.05 (t,  $J = 7.9$  Hz, 1H), 3.38 (s, 2H), 2.27 (s, 6H).

<sup>13</sup>C NMR (100 MHz, CDCl<sub>3</sub>)  $\delta$  134.4, 131.1, 130.2, 129.6, 125.2, 122.0, 86.2, 83.8, 48.4, 44.1.

HRMS  $m/z$  (ESI<sup>+</sup>): Calculated for C<sub>11</sub>H<sub>13</sub>BrN ([M+H]<sup>+</sup>): 238.0226, found 238.0217.

### 3-(4-Bromophenyl)-*N,N*-dimethylprop-2-yn-1-amine (1q)

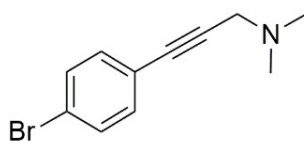

Purified by silica gel column chromatography (10–15% ethyl acetate in petroleum ether) afforded **1q** (179.7 mg, 76% yield) as yellow oil. *Known compound*.<sup>[5]</sup>

<sup>1</sup>H NMR (400 MHz, Chloroform-d)  $\delta$  7.40 (dd,  $J = 8.5, 1.7$  Hz, 2H), 7.27 (dd,  $J = 8.4, 1.6$  Hz, 2H), 3.43 (s, 2H), 2.34 (d,  $J = 1.5$  Hz, 6H).

### *N,N*-Dimethylhept-2-yn-1-amine (1r)

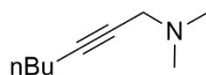

Purified by silica gel column chromatography (10–15% ethyl acetate in petroleum ether) afforded **1r** (90.4 mg, 65% yield) as yellow oil. *Known compound*.<sup>[8]</sup>

<sup>1</sup>H NMR (400 MHz, Chloroform-d)  $\delta$  3.19 (s, 2H), 2.43–1.96 (m, 8H), 1.58–1.24 (m, 4H), 0.89 (t,  $J = 7.1$  Hz, 3H).

### 3-Cyclohexenyl-*N,N*-dimethylprop-2-yn-1-amine (1s)



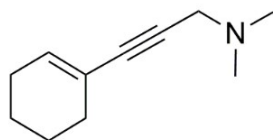

Purified by silica gel column chromatography (10–15% ethyl acetate in petroleum ether) afforded **1s** (120.1 mg, 74% yield) as yellow oil.

$^1\text{H NMR}$  (400 MHz, Chloroform- $d$ )  $\delta$  6.23–5.94 (m, 1H), 3.31 (s, 2H), 2.26 (s, 6H), 2.18–1.95 (m, 4H), 1.74–1.39 (m, 4H).

$^{13}\text{C NMR}$  (100 MHz,  $\text{CDCl}_3$ )  $\delta$  134.0, 120.5, 87.0, 81.5, 48.5, 44.0, 29.4, 25.5, 22.3, 21.5.

**HRMS**  $m/z$  (ESI $^+$ ): Calculated for  $\text{C}_{11}\text{H}_{18}\text{N}$  ( $[\text{M}+\text{H}]^+$ ): 164.1434, found 164.1432.

## General Procedure for the Preparation of **3** and Its Characterization

### Data

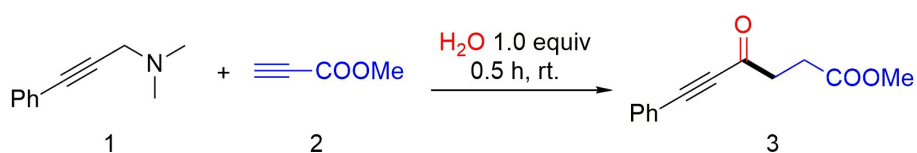

**General Procedure for Synthesis of Compounds **3****: Under atmospheric stirring conditions,  $\text{H}_2\text{O}$  (0.5 equiv), amine **1** (0.5 mmol), and alkynyl ester **2** (1.2 mmol) were added in sequence, and then stirred at room temperature for 30 min. Subsequently, the reaction mixture was extracted and separated with a saturated  $\text{NH}_4\text{Cl}$  solution. The upper organic phase was washed with brine and dried with  $\text{Na}_2\text{SO}_4$ , then filtered, and the solvent was removed in a rotary evaporator. The residue was purified by flash chromatography (5–10% ethyl acetate in petroleum ether) to provide the desired product **3a-3w**.

### Methyl 4-oxo-6-phenylhex-5-ynoate (**3a**)

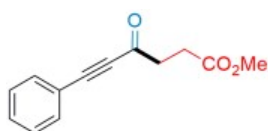

Purified by silica gel column chromatography (5–10% ethyl acetate in petroleum ether) afforded **3a** (188.8 mg, 87% yield) as yellow oil.

<sup>1</sup>H NMR (400 MHz, Chloroform-d) δ 7.55–7.46 (m, 2H), 7.45–7.36 (m, 1H), 7.36–7.27 (m, 2H), 3.63 (s, 3H), 2.96 (t, *J* = 6.8 Hz, 2H), 2.66 (t, *J* = 6.7 Hz, 2H).

<sup>13</sup>C NMR (100 MHz, CDCl<sub>3</sub>) δ 185.2, 172.4, 133.0, 130.8, 128.6, 119.7, 91.2, 87.4, 51.7, 40.0, 27.8.

HRMS *m/z* (ESI<sup>+</sup>): Calculated for C<sub>13</sub>H<sub>13</sub>O<sub>3</sub> ([M+H]<sup>+</sup>): 217.0859, found 217.0861.

### Methyl 4-oxo-6-o-tolylhex-5-ynoate (**3b**)

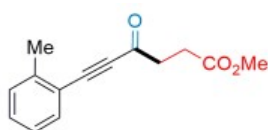

Purified by silica gel column chromatography (5–10% ethyl acetate in petroleum ether) afforded **3b** (64.5 mg, 56% yield) as yellow oil.

<sup>1</sup>H NMR (400 MHz, Chloroform-d) δ 7.57–7.47 (m, 1H), 7.38–7.29 (m, 1H), 7.27–7.22 (m, 1H), 7.22–7.16 (m, 1H), 3.69 (s, 3H), 3.18–2.94 (m, 2H), 2.81–2.61 (m, 2H), 2.48 (s, 3H).

<sup>13</sup>C NMR (100 MHz, CDCl<sub>3</sub>) δ 185.2, 172.5, 142.2, 133.5, 130.9, 129.8, 125.9, 119.6, 91.2, 90.5, 51.8, 40.1, 27.9, 20.5.

HRMS *m/z* (ESI<sup>+</sup>): Calculated for C<sub>14</sub>H<sub>15</sub>O<sub>3</sub> ([M+H]<sup>+</sup>): 231.1016, found 231.1015.

### Methyl 4-oxo-6-m-tolylhex-5-ynoate (**3c**)

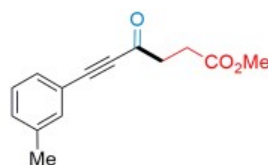

Purified by silica gel column chromatography (5–10% ethyl acetate in petroleum ether) afforded **3c** (87.8 mg, 76% yield) as yellow oil.

<sup>1</sup>H NMR (400 MHz, Chloroform-d) δ 7.48–7.31 (m, 2H), 7.31–7.16 (m, 2H), 3.69 (s, 3H), 3.00 (t, *J* = 6.8 Hz, 2H), 2.70 (t, *J* = 6.7 Hz, 2H), 2.34 (s, 3H).

<sup>13</sup>C NMR (100 MHz, CDCl<sub>3</sub>) δ 185.3, 172.5, 138.4, 133.5, 131.7, 130.2, 128.5, 119.6, 91.8, 87.2, 51.8, 40.0, 27.9, 21.1.

**HRMS**  $m/z$  (ESI<sup>+</sup>): Calculated for C<sub>14</sub>H<sub>15</sub>O<sub>3</sub> ([M+H]<sup>+</sup>): 231.1016, found 231.1016.

**Methyl 4-oxo-6-p-tolylhex-5-ynoate (3d)**

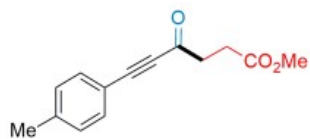

Purified by silica gel column chromatography (5–10% ethyl acetate in petroleum ether) afforded **3d** (80.5 mg, 69% yield) as yellow oil.

**<sup>1</sup>H NMR** (400 MHz, Chloroform-d)  $\delta$  7.72–7.39 (m, 2H), 7.31–7.02 (m, 2H), 3.69 (s, 3H), 3.00 (t,  $J$  = 6.8 Hz, 2H), 2.70 (t,  $J$  = 6.7 Hz, 2H), 2.37 (s, 3H).

**<sup>13</sup>C NMR** (100 MHz, CDCl<sub>3</sub>)  $\delta$  185.3, 172.5, 141.5, 133.1, 129.4, 116.7, 92.1, 87.3, 51.8, 40.0, 27.9, 21.6.

**HRMS**  $m/z$  (ESI<sup>+</sup>): Calculated for C<sub>14</sub>H<sub>15</sub>O<sub>3</sub> ([M+H]<sup>+</sup>): 231.1016, found 231.1015.

**Methyl 6-(4-ethylphenyl)-4-oxohex-5-ynoate (3e)**

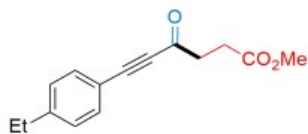

Purified by silica gel column chromatography (5–10% ethyl acetate in petroleum ether) afforded **3e** (as light yellow oil).

**<sup>1</sup>H NMR** (400 MHz, Chloroform-d)  $\delta$  85.7 mg, 70% yield) 7.51 (d,  $J$  = 7.8 Hz, 2H), 7.23 (d,  $J$  = 7.8 Hz, 2H), 3.72 (s, 3H), 3.03 (t,  $J$  = 6.8 Hz, 2H), 2.81–2.46 (m, 4H), 1.26 (t,  $J$  = 7.6 Hz, 3H).

**<sup>13</sup>C NMR** (100 MHz, CDCl<sub>3</sub>)  $\delta$  185.3, 172.5, 147.7, 133.2, 128.2, 117.0, 92.1, 87.3, 51.8, 40.0, 29.0, 28.0, 15.0.

**HRMS**  $m/z$  (ESI<sup>+</sup>): Calculated for C<sub>15</sub>H<sub>17</sub>O<sub>3</sub> ([M+H]<sup>+</sup>): 245.1172, found 245.1171.

**Methyl 6-(4-butylphenyl)-4-oxohex-5-ynoate (3f)**

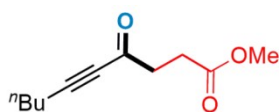

Purified by silica gel column chromatography (5–10% ethyl acetate in petroleum ether) afforded **3f** (114.4 mg, 84% yield) as yellow oil.

**<sup>1</sup>H NMR** (400 MHz, Chloroform-d) δ 7.49 (d, *J* = 8.0 Hz, 2H), 7.20 (d, *J* = 8.1 Hz, 2H), 3.70 (s, 3H), 3.02 (t, *J* = 6.8 Hz, 2H), 2.72 (t, *J* = 6.7 Hz, 2H), 2.64 (t, *J* = 7.7 Hz, 2H), 1.66–1.54 (m, 2H), 1.41–1.29 (m, 2H), 0.93 (t, *J* = 7.3 Hz, 3H).

**<sup>13</sup>C NMR** (100 MHz, CDCl<sub>3</sub>) δ 185.3, 172.5, 146.5, 133.1, 128.8, 116.9, 92.2, 87.3, 51.8, 40.0, 35.7, 33.1, 27.9, 22.2, 13.8.

**HRMS** *m/z* (ESI<sup>+</sup>): Calculated for C<sub>17</sub>H<sub>21</sub>O<sub>3</sub> ([M+H]<sup>+</sup>): 273.1485, found 273.1485.

### Methyl 4-oxo-6-(4-pentylphenyl)hex-5-ynoate (**3g**)

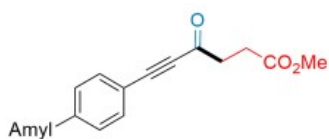

Purified by silica gel column chromatography (5–10% ethyl acetate in petroleum ether) afforded **3g** (113.1 mg, 79% yield) as yellow oil.

**<sup>1</sup>H NMR** (400 MHz, Chloroform-d) δ 7.51 (d, *J* = 8.3 Hz, 2H), 7.21 (d, *J* = 8.2 Hz, 2H), 3.72 (s, 3H), 3.03 (t, *J* = 6.8 Hz, 2H), 2.73 (t, *J* = 6.8 Hz, 2H), 2.64 (t, *J* = 6.7 Hz, 2H), 1.71–1.56 (m, 2H), 1.45–1.20 (m, 4H), 0.91 (t, *J* = 6.8 Hz, 3H).

**<sup>13</sup>C NMR** (100 MHz, CDCl<sub>3</sub>) δ 185.3, 172.5, 146.5, 133.1, 128.8, 116.9, 92.2, 87.3, 51.8, 40.0, 36.0, 31.4, 30.7, 28.0, 22.4, 13.9.

**HRMS** *m/z* (ESI<sup>+</sup>): Calculated for C<sub>18</sub>H<sub>23</sub>O<sub>3</sub> ([M+H]<sup>+</sup>): 287.1642, found 287.1643.

### Methyl 6-(biphenyl-4-yl)-4-oxohex-5-ynoate (**3h**)

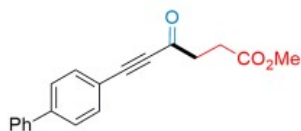

Purified by silica gel column chromatography (5–10% ethyl acetate in petroleum ether) afforded **3h** (126.3 mg, 86% yield) as yellow oil.

**<sup>1</sup>H NMR** (400 MHz, Chloroform-d) δ 7.65–7.61 (m, 2H), 7.61–7.56 (m, 4H), 7.49–7.42 (m, 2H), 7.41–7.35 (m, 1H), 3.71 (s, 3H), 3.04 (t, *J* = 6.7 Hz, 2H), 2.73 (t, *J* = 6.7 Hz, 2H).

**<sup>13</sup>C NMR** (100 MHz, CDCl<sub>3</sub>) δ 185.2, 172.5, 143.6, 139.7, 133.6, 129.0, 128.2, 127.2, 127.1, 118.5, 91.4, 88.1, 51.8, 40.0, 27.9.

**HRMS** *m/z* (ESI<sup>+</sup>): Calculated for C<sub>19</sub>H<sub>17</sub>O<sub>3</sub> ([M+H]<sup>+</sup>): 293.1172, found 293.1171.

### Methyl 6-(4-methoxyphenyl)-4-oxohex-5-ynoate (3i)

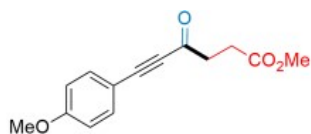

Purified by silica gel column chromatography (5–10% ethyl acetate in petroleum ether) afforded **3i** (55.2 mg, 45% yield) as yellow oil.

<sup>1</sup>H NMR (400 MHz, Chloroform-d)  $\delta$  7.52 (d,  $J$  = 8.9 Hz, 2H), 6.89 (d,  $J$  = 8.9 Hz, 2H), 3.83 (s, 3H), 3.69 (s, 3H), 2.99 (t,  $J$  = 6.7 Hz, 2H), 2.70 (t,  $J$  = 6.7 Hz, 2H).

<sup>13</sup>C NMR (100 MHz, CDCl<sub>3</sub>)  $\delta$  185.3, 172.6, 161.8, 135.1, 114.4, 111.5, 92.6, 87.3, 55.4, 51.8, 39.9, 28.0.

HRMS  $m/z$  (ESI<sup>+</sup>): Calculated for C<sub>14</sub>H<sub>15</sub>O<sub>4</sub> ([M+H]<sup>+</sup>): 247.0965, found 247.0964.

### Methyl 6-(3-methoxyphenyl)-4-oxohex-5-ynoate (3j)

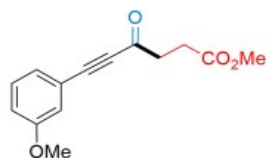

Purified by silica gel column chromatography (5–10% ethyl acetate in petroleum ether) afforded **3j** (45.9 mg, 37% yield) as yellow oil.

<sup>1</sup>H NMR (400 MHz, Chloroform-d)  $\delta$  7.40–7.24 (m, 1H), 7.22–7.13 (m, 1H), 7.13–7.05 (m, 1H), 7.05–6.96 (m, 1H), 3.80 (s, 3H), 3.70 (s, 3H), 3.02 (t,  $J$  = 6.7 Hz, 2H), 2.71 (t,  $J$  = 6.7 Hz, 2H).

<sup>13</sup>C NMR (100 MHz, CDCl<sub>3</sub>)  $\delta$  185.3, 172.5, 159.5, 129.7, 125.5, 120.7, 91.3, 87.1, 55.3, 51.8, 40.0, 27.9.

HRMS  $m/z$  (ESI<sup>+</sup>): Calculated for C<sub>14</sub>H<sub>15</sub>O<sub>4</sub> ([M+H]<sup>+</sup>): 247.0965, found 247.0964.

### Methyl 6-(2-fluorophenyl)-4-oxohex-5-ynoate (3k)

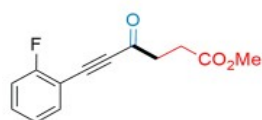

Purified by silica gel column chromatography (5–10% ethyl acetate in petroleum ether) afforded **3k** (104.4 mg, 89% yield) as light yellow oil.

<sup>1</sup>H NMR (400 MHz, Chloroform-d)  $\delta$  7.77–7.50 (m, 1H), 7.50–7.37 (m, 1H), 7.30–

7.04 (m, 2H), 3.70 (s, 3H), 3.03 (t,  $J = 6.6$  Hz, 2H), 2.72 (t,  $J = 6.7$  Hz, 2H).

$^{13}\text{C}$  NMR (100 MHz,  $\text{CDCl}_3$ )  $\delta$  185.0, 172.4, 163.6 (d,  $J = 255.8$  Hz), 134.6, 132.8 (d,  $J = 8.1$  Hz), 124.3 (d,  $J = 3.8$  Hz), 115.9 (d,  $J = 20.4$  Hz), 108.7 (d,  $J = 15.3$  Hz), 91.7 (d,  $J = 3.2$  Hz), 84.6, 51.8, 40.0, 27.8.

$^{19}\text{F}$  NMR (376 MHz, Chloroform-d)  $\delta$  -107.14.

HRMS  $m/z$  (ESI $^+$ ): Calculated for  $\text{C}_{13}\text{H}_{12}\text{FO}_3$  ( $[\text{M}+\text{H}]^+$ ): 235.0765, found 235.0765.

### Methyl 6-(3-fluorophenyl)-4-oxohex-5-ynoate (**3l**)

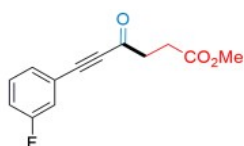

Purified by silica gel column chromatography (5–10% ethyl acetate in petroleum ether) afforded **3l** (110.9 mg, 95% yield) as yellow oil.

$^1\text{H}$  NMR (400 MHz, Chloroform-d)  $\delta$  7.36–7.26 (m, 2H), 7.25–7.15 (m, 1H), 7.15–7.04 (m, 1H), 3.65 (s, 3H), 2.98 (t,  $J = 6.7$  Hz, 2H), 2.67 (t,  $J = 6.6$  Hz, 2H).

$^{13}\text{C}$  NMR (100 MHz,  $\text{CDCl}_3$ )  $\delta$  185.0, 172.3, 162.2 (d,  $J = 248.2$  Hz), 136.8, 124.5, 121.6 (d,  $J = 9.3$  Hz), 118.8 (dd,  $J = 135.7, 22.2$  Hz), 89.2 (d,  $J = 3.5$  Hz), 87.6, 51.8, 40.0, 27.7.

$^{19}\text{F}$  NMR (376 MHz, Chloroform-d)  $\delta$  -111.71.

HRMS  $m/z$  (ESI $^+$ ): Calculated for  $\text{C}_{13}\text{H}_{12}\text{FO}_3$  ( $[\text{M}+\text{H}]^+$ ): 235.0765, found 235.0766.

### Methyl 6-(4-fluorophenyl)-4-oxohex-5-ynoate (**3m**)

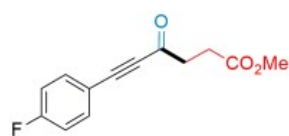

Purified by silica gel column chromatography (5–10% ethyl acetate in petroleum ether) afforded **3m** (106.5 mg, 91% yield) as yellow oil.

$^1\text{H}$  NMR (400 MHz, Chloroform-d)  $\delta$  7.75–7.34 (m, 2H), 7.24–6.95 (m, 2H), 3.70 (s, 3H), 3.02 (t,  $J = 6.6$  Hz, 2H), 2.71 (t,  $J = 6.7$  Hz, 2H).

$^{13}\text{C}$  NMR (100 MHz,  $\text{CDCl}_3$ )  $\delta$  185.2, 172.5, 165.3, 162.8, 135.3 (d,  $J = 8.9$  Hz), 116.2 (d,  $J = 22.4$  Hz), 90.2, 87.3 (d,  $J = 1.5$  Hz), 51.9, 40.0, 27.8.

$^{19}\text{F}$  NMR (376 MHz, Chloroform-d)  $\delta$  -106.08.

**HRMS**  $m/z$  (ESI<sup>+</sup>): Calculated for C<sub>13</sub>H<sub>12</sub>FO<sub>3</sub> ([M+H]<sup>+</sup>): 235.0765, found 235.0766.

**Methyl 6-(3-chlorophenyl)-4-oxohex-5-ynoate (3n)**

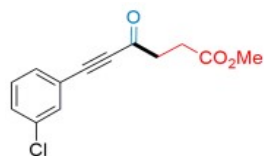

Purified by silica gel column chromatography (5–10% ethyl acetate in petroleum ether) afforded **3n** (113.1 mg, 90% yield) as yellow oil.

<sup>1</sup>H NMR (400 MHz, Chloroform-d)  $\delta$  7.49 (d,  $J$  = 1.8 Hz, 1H), 7.44–7.34 (m, 2H), 7.28 (t,  $J$  = 7.9 Hz, 1H), 3.66 (s, 3H), 2.98 (t,  $J$  = 6.7 Hz, 2H), 2.67 (t,  $J$  = 6.7 Hz, 2H).

<sup>13</sup>C NMR (100 MHz, CDCl<sub>3</sub>)  $\delta$  184.9, 172.3, 134.5, 132.5, 131.0, 131.0, 129.9, 121.5, 89.0, 87.8, 51.8, 40.0, 27.7.

**HRMS**  $m/z$  (ESI<sup>+</sup>): Calculated for C<sub>13</sub>H<sub>12</sub>ClO<sub>3</sub> ([M+H]<sup>+</sup>): 251.0469, found 251.0470.

**Methyl 6-(2-bromophenyl)-4-oxohex-5-ynoate (3o)**

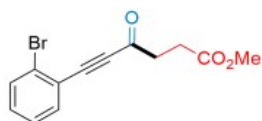

Purified by silica gel column chromatography (5–10% ethyl acetate in petroleum ether) afforded **3o** (112.2 mg, 76% yield) as yellow oil.

<sup>1</sup>H NMR (400 MHz, Chloroform-d)  $\delta$  7.64 (dd,  $J$  = 7.5, 1.8 Hz, 1H), 7.61–7.58 (m, 1H), 7.35–7.30 (m, 2H), 3.72 (s, 3H), 3.07 (t,  $J$  = 6.7 Hz, 2H), 2.76 (t,  $J$  = 6.8 Hz, 2H).

<sup>13</sup>C NMR (100 MHz, CDCl<sub>3</sub>)  $\delta$  185.2, 172.4, 134.9, 132.8, 131.9, 127.3, 126.8, 122.3, 90.6, 89.3, 51.9, 40.2, 27.9.

**HRMS**  $m/z$  (ESI<sup>+</sup>): Calculated for C<sub>13</sub>H<sub>12</sub>BrO<sub>3</sub> ([M+H]<sup>+</sup>): 294.9964, found 294.9964.

**Methyl 6-(3-bromophenyl)-4-oxohex-5-ynoate (3p)**

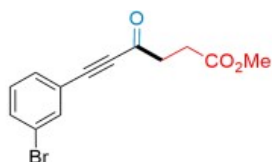

Purified by silica gel column chromatography (5–10% ethyl acetate in petroleum ether) afforded **3p** (125.1 mg, 85% yield) as light yellow oil.

**<sup>1</sup>H NMR** (400 MHz, Chloroform-d) δ 7.69 (t, *J* = 1.8 Hz, 1H), 7.60–7.54 (m, 1H), 7.50–7.44 (m, 1H), 7.24 (t, *J* = 7.9 Hz, 1H), 3.68 (s, 3H), 3.00 (t, *J* = 6.7 Hz, 2H), 2.69 (t, *J* = 6.7 Hz, 2H).

**<sup>13</sup>C NMR** (100 MHz, CDCl<sub>3</sub>) δ 185.0, 172.4, 135.5, 133.9, 131.5, 130.1, 122.4, 121.8, 89.0, 87.9, 51.9, 40.0, 27.8.

**HRMS** *m/z* (ESI<sup>+</sup>): Calculated for C<sub>13</sub>H<sub>12</sub>BrO<sub>3</sub> ([M+H]<sup>+</sup>): 294.9964, found 294.9964.

### Methyl 6-(4-bromophenyl)-4-oxohex-5-ynoate (**3q**)

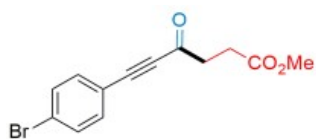

Purified by silica gel column chromatography (5–10% ethyl acetate in petroleum ether) afforded **3q** (121.4 mg, 82% yield) as yellow oil.

**<sup>1</sup>H NMR** (400 MHz, Chloroform-d) δ 7.50 (d, *J* = 8.5 Hz, 2H), 7.40 (d, *J* = 8.6 Hz, 2H), 3.67 (s, 3H), 2.99 (t, *J* = 6.7 Hz, 2H), 2.68 (t, *J* = 6.7 Hz, 2H).

**<sup>13</sup>C NMR** (100 MHz, CDCl<sub>3</sub>) δ 185.0, 172.4, 134.3, 132.0, 125.6, 118.7, 89.8, 88.2, 51.8, 40.0, 27.8.

**HRMS** *m/z* (ESI<sup>+</sup>): Calculated for C<sub>13</sub>H<sub>12</sub>BrO<sub>3</sub> ([M+H]<sup>+</sup>): 294.9964, found 294.9966.

### Methyl 6-cyclohexenyl-4-oxohex-5-ynoate (**3s**)

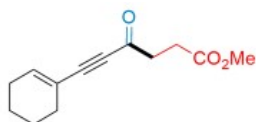

Purified by silica gel column chromatography (5–10% ethyl acetate in petroleum ether) afforded **3s** (29.4 mg, 27% yield) as yellow oil.

**<sup>1</sup>H NMR** (400 MHz, Chloroform-d) δ 6.47 (t, *J* = 2.1 Hz, 1H), 3.70 (s, 3H), 2.92 (t, *J* = 6.8 Hz, 2H), 2.67 (t, *J* = 6.8 Hz, 2H), 2.23–2.10 (m, 4H), 1.73–1.57 (m, 4H).

**<sup>13</sup>C NMR** (100 MHz, CDCl<sub>3</sub>) δ 185.5, 172.6, 142.6, 118.9, 94.0, 85.7, 51.8, 39.9, 28.3, 28.0, 26.1, 21.9, 21.1.

**HRMS** *m/z* (ESI<sup>+</sup>): Calculated for C<sub>13</sub>H<sub>17</sub>O<sub>3</sub> ([M+H]<sup>+</sup>): 221.1172, found 221.1173.

### Ethyl 4-oxo-6-phenylhex-5-ynoate (**3t**)



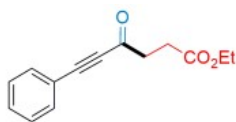

Purified by silica gel column chromatography (5–10% ethyl acetate in petroleum ether) afforded **3t** (76.8 mg, 67% yield) as yellow oil.

$^1\text{H NMR}$  (400 MHz, Chloroform- $d$ )  $\delta$  7.61–7.47 (m, 2H), 7.47–7.41 (m, 1H), 7.39–7.32 (m, 2H), 4.14 (q,  $J$  = 7.1 Hz, 2H), 3.00 (t,  $J$  = 6.7 Hz, 2H), 2.68 (t,  $J$  = 6.7 Hz, 2H), 1.24 (t,  $J$  = 7.1 Hz, 3H).

$^{13}\text{C NMR}$  (100 MHz,  $\text{CDCl}_3$ )  $\delta$  185.3, 172.0, 133.0, 130.8, 128.6, 119.8, 91.2, 87.4, 60.7, 40.0, 28.2, 14.1.

**HRMS**  $m/z$  (ESI $^+$ ): Calculated for  $\text{C}_{14}\text{H}_{15}\text{O}_3$  ( $[\text{M}+\text{H}]^+$ ): 230.1016, found 230.1017.

### Tert-butyl 4-oxo-6-phenylhex-5-ynoate (**3u**)

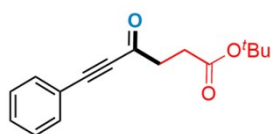

Purified by silica gel column chromatography (5–10% ethyl acetate in petroleum ether) afforded **3u** (39.7 mg, 31% yield) as yellow oil.

$^1\text{H NMR}$  (400 MHz, Chloroform- $d$ )  $\delta$  7.62–7.55 (m, 2H), 7.51–7.44 (m, 1H), 7.42–7.35 (m, 2H), 2.97 (t,  $J$  = 6.8 Hz, 2H), 2.65 (t,  $J$  = 6.7 Hz, 2H), 1.47 (s, 9H).

$^{13}\text{C NMR}$  (100 MHz,  $\text{CDCl}_3$ )  $\delta$  185.7, 171.2, 133.0, 130.7, 128.6, 119.9, 91.2, 87.5, 80.9, 40.2, 29.5, 28.0.

**HRMS**  $m/z$  (ESI $^+$ ): Calculated for  $\text{C}_{16}\text{H}_{19}\text{O}_3$  ( $[\text{M}+\text{H}]^+$ ): 259.1329, found 259.1325.

### Further application and transformations

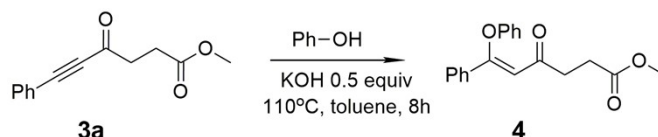

**Synthesis of Compounds 4:** Under atmospheric stirring conditions, KOH (0.25 mmol, 0.5 equiv), compounds **3a** (0.5 mmol, 1.0 equiv), phenol (0.5 mmol, 1.0 equiv), and toluene (2.0 mL) were added in sequence, and then stirred at 100 °C for 8 h. Subsequently, the reaction mixture was extracted and separated with a saturated

NH<sub>4</sub>Cl solution. The upper organic phase was washed with brine and dried with Na<sub>2</sub>SO<sub>4</sub>, then filtered, and the solvent was removed in a rotary evaporator. The residue was purified by flash chromatography (5–10% ethyl acetate in petroleum ether) to provide the desired product **4** (145.9 mg, 94% yield).

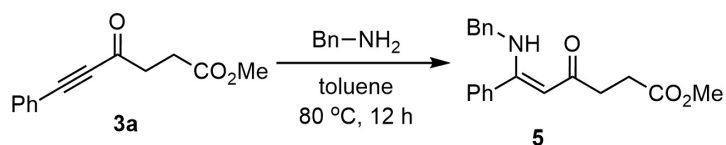

**Synthesis of Compounds 5:** Under atmospheric stirring conditions, compounds **3a** (0.5 mmol, 1.0 equiv), benzylamine (0.5 mmol, 1.0 equiv), and toluene (2.0 mL) were measured in sequence, and then stirred at 80 °C for 12 h. Subsequently, the reaction mixture was extracted and separated with a saturated NH<sub>4</sub>Cl solution. The upper organic phase was washed with brine and dried with Na<sub>2</sub>SO<sub>4</sub>, then filtered, and the solvent was removed in a rotary evaporator. The residue was purified by flash chromatography (5–10% ethyl acetate in petroleum ether) to provide the desired product **5** (119.9 mg, 78% yield).

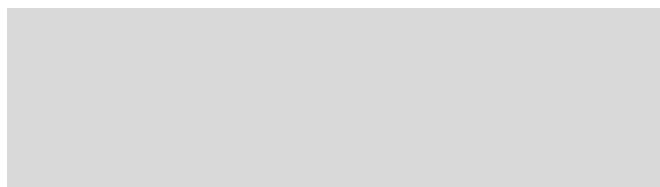

**Synthesis of Compounds 6:** Under atmospheric stirring conditions, CuI (0.05 mmol, 10 mol%), compounds **3a** (0.5 mmol, 1.0 equiv), DBU (0.5 mmol, 1.0 equiv), and toluene (2.0 mL) were added in sequence, and then stirred at 110 °C for 12 h. Subsequently, the reaction mixture was extracted and separated with a saturated NH<sub>4</sub>Cl solution. The upper organic phase was washed with brine and dried with Na<sub>2</sub>SO<sub>4</sub>, then filtered, and the solvent was removed in a rotary evaporator. The residue was purified by flash chromatography (5–10% ethyl acetate in petroleum ether) to provide the desired product **6** (168.2 mg, 87% yield).

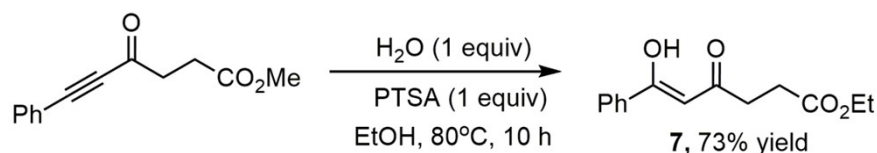

**Synthesis of Compounds 7:** Under atmospheric stirring conditions, PTSA (0.5 mmol, 1.0 equiv), H<sub>2</sub>O (0.5 mmol, 1.0 equiv), compounds **3a** (0.5 mmol, 1.0 equiv), and EtOH (2.0 mL) were added in sequence, and then stirred at 80 °C for 10 h. Subsequently, the reaction mixture was extracted and separated with a saturated NH<sub>4</sub>Cl solution. The upper organic phase was washed with brine and dried with Na<sub>2</sub>SO<sub>4</sub>, then filtered, and the solvent was removed in a rotary evaporator. The residue was purified by flash chromatography (20–25% ethyl acetate in petroleum ether) to provide the desired product **7** (91.2 mg, 73% yield).

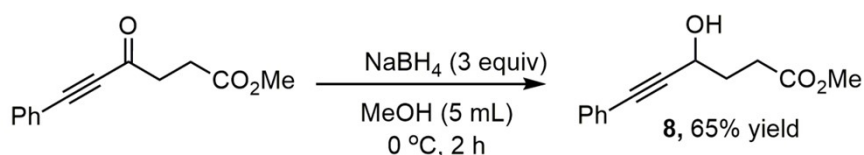

**Synthesis of Compounds 8:** Under atmospheric stirring conditions, NaBH<sub>4</sub> (1.5 mmol, 3.0 equiv), compounds **3a** (0.5 mmol, 1.0 equiv), and MeOH (5 mL) were added in sequence, and then stirred at 0 °C for 2 h. Subsequently, the reaction mixture was extracted and separated with a saturated NH<sub>4</sub>Cl solution. The upper organic phase was washed with brine and dried with Na<sub>2</sub>SO<sub>4</sub>, then filtered, and the solvent was removed in a rotary evaporator. The residue was purified by flash chromatography (30–40% ethyl acetate in petroleum ether) to provide the desired product **8** (71.1 mg, 65% yield).

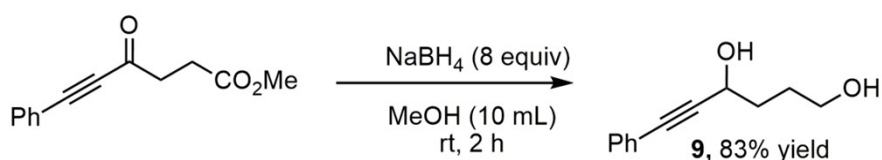

**Synthesis of Compounds 9:** Under atmospheric stirring conditions, NaBH<sub>4</sub> (4.0 mmol, 8.0 equiv), compounds **3a** (0.5 mmol, 1.0 equiv), and MeOH (10 mL) were added in sequence, and then stirred at rt for 2 h. Subsequently, the reaction mixture was extracted and separated with a saturated NH<sub>4</sub>Cl solution. The upper organic phase

was washed with brine and dried with  $\text{Na}_2\text{SO}_4$ , then filtered, and the solvent was removed in a rotary evaporator. The residue was purified by flash chromatography (70–80% ethyl acetate in petroleum ether) to provide the desired product **9** (79.0 mg, 83% yield).

**(Z) -Methyl 4-oxo-6-phenoxy-6-phenylhex-5-enoate (4)**

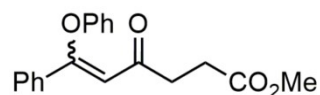

Purified by silica gel column chromatography (5–10% ethyl acetate in petroleum ether) afforded **4** (145.9 mg, 94% yield) as yellow oil.

$^1\text{H NMR}$  (400 MHz, Chloroform- $d$ )  $\delta$  7.60 (m, 2H), 7.50–7.41 (m, 2H), 7.39–7.12 (m, 4H), 7.06–6.92 (m, 2H), 6.29 (d,  $J = 1.4$  Hz, 0.65H), 5.57 (s, 0.35H), 3.65 (d,  $J = 14.0$  Hz, 3H), 3.14 (t,  $J = 6.5$  Hz, 1.3H), 2.61 (q,  $J = 7.0$  Hz, 2H), 2.52 (d,  $J = 6.5$  Hz, 0.7H).

$^{13}\text{C NMR}$  (100 MHz,  $\text{CDCl}_3$ )  $\delta$  197.5, 196.5, 173.4, 173.3, 169.1, 160.9, 156.0, 154.0, 134.0, 133.8, 130.6, 130.5, 130.1, 129.8, 129.4, 128.8, 128.1, 127.6, 125.6, 123.0, 121.3, 117.0, 116.3, 106.4, 51.6, 38.2, 37.7, 28.1, 28.0.

**HRMS**  $m/z$  (ESI $^+$ ): Calculated for  $\text{C}_{19}\text{H}_{19}\text{O}_4$  ( $[\text{M}+\text{H}]^+$ ): 311.1278, found 311.1273.

**(Z)-Methyl 4-oxo-6-phenyl-6-(phenylamino)hex-5-enoate (5)**

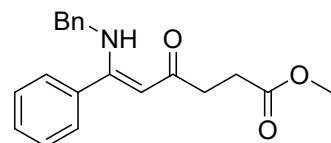

Purified by silica gel column chromatography (5–10% ethyl acetate in petroleum ether) afforded **5** (119.9 mg, 78% yield) as yellow oil.

$^1\text{H NMR}$  (400 MHz, Chloroform- $d$ )  $\delta$  10.96 (t,  $J = 6.7$  Hz, 1H), 7.47–6.89 (m, 10H), 5.16 (s, 1H), 4.33 (d,  $J = 6.6$  Hz, 2H), 3.70 (s, 3H), 2.70 (dd,  $J = 24.8, 6.6$  Hz, 4H).

$^{13}\text{C NMR}$  (100 MHz,  $\text{CDCl}_3$ )  $\delta$  196.0, 173.9, 165.1, 138.5, 135.2, 129.5, 128.7, 128.5, 127.7, 127.3, 126.9, 96.5, 51.6, 48.3, 36.3, 29.1.

**HRMS**  $m/z$  (ESI $^+$ ): Calculated for  $\text{C}_{20}\text{H}_{22}\text{NO}_3$  ( $[\text{M}+\text{H}]^+$ ): 324.1594, found 324.1599.

**(Z)-Methyl 4-oxo-6-(3-(2-oxoazepan-1-yl)propylamino)-6-phenylhex-5-enoate (6)**

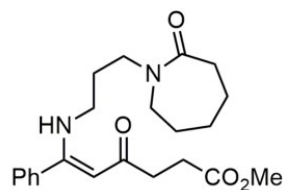

Purified by silica gel column chromatography (5–10% ethyl acetate in petroleum ether) afforded **6** (168.2 mg, 87% yield) as yellow oil.

<sup>1</sup>H NMR (400 MHz, Chloroform-d)  $\delta$  10.56 (t,  $J$  = 6.2 Hz, 1H), 7.45–7.26 (m, 3H), 7.23 (d,  $J$  = 5.0 Hz, 2H), 4.95 (s, 1H), 3.59 (s, 3H), 3.24 (t,  $J$  = 6.9 Hz, 2H), 3.19–3.10 (m, 2H), 3.05 (d,  $J$  = 7.0 Hz, 2H), 2.65–2.48 (m, 4H), 2.42–2.27 (m, 2H), 1.67–1.53 (m, 4H), 1.50–1.37 (m, 4H).

<sup>13</sup>C NMR (100 MHz, CDCl<sub>3</sub>)  $\delta$  195.4, 175.6, 173.7, 165.1, 135.2, 129.3, 128.4, 127.6, 95.8, 51.5, 49.5, 45.6, 42.2, 37.0, 36.1, 29.8, 29.5, 29.1, 28.6, 23.2.

HRMS  $m/z$  (ESI<sup>+</sup>): Calculated for C<sub>22</sub>H<sub>31</sub>N<sub>2</sub>O<sub>4</sub> ([M+H]<sup>+</sup>): 387.2278, found 387.2278.

**(Z)-Ethyl 6-hydroxy-4-oxo-6-phenylhex-5-enoate (7)**

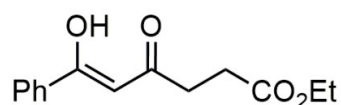

Purified by silica gel column chromatography (20–25% ethyl acetate in petroleum ether) afforded **7** (91.2 mg, 73% yield) as yellow oil.

<sup>1</sup>H NMR (400 MHz, Chloroform-d)  $\delta$  15.84 (s, 1H), 7.97–7.83 (m, 2H), 7.56–7.38 (m, 3H), 6.21 (s, 1H), 4.17 (q,  $J$  = 7.4 Hz, 2H), 2.82 (t,  $J$  = 6.9 Hz, 2H), 2.70 (t,  $J$  = 6.9 Hz, 2H), 1.27 (t,  $J$  = 7.2 Hz, 3H).

<sup>13</sup>C NMR (100 MHz, CDCl<sub>3</sub>)  $\delta$  197.0, 180.6, 172.5, 134.3, 132.2, 128.6, 126.9, 96.2, 60.7, 34.5, 29.1, 14.2.

HRMS  $m/z$  (ESI<sup>+</sup>): Calculated for C<sub>14</sub>H<sub>17</sub>O<sub>4</sub> ([M+H]<sup>+</sup>): 249.1121, found 249.1122.

**Methyl 4-hydroxy-6-phenylhex-5-ynoate (8)**

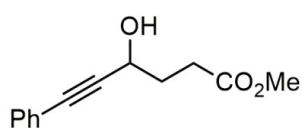

Purified by silica gel column chromatography (30–40% ethyl acetate in petroleum ether) afforded **8** (71.1 mg, 65% yield) as yellow oil. *Known compound*.<sup>[9]</sup>

<sup>1</sup>H NMR (400 MHz, Chloroform-d)  $\delta$  7.48–7.41 (m, 2H), 7.36–7.26 (m, 3H), 4.73 (d,  $J$  = 5.6 Hz, 1H), 3.71 (s, 3H), 2.70–2.56 (m, 3H), 2.16 (q,  $J$  = 6.7 Hz, 2H).

<sup>13</sup>C NMR (100 MHz, CDCl<sub>3</sub>)  $\delta$  174.1, 131.7, 128.5, 128.3, 122.4, 89.1, 85.4, 62.0, 51.8, 32.5, 29.8.

### 6-Phenylhex-5-yne-1,4-diol (**9**)

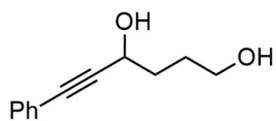

Purified by silica gel column chromatography (70–80% ethyl acetate in petroleum ether) afforded **9** (79.0 mg, 83% yield) as yellow oil. *Known compound*.<sup>[10]</sup>

<sup>1</sup>H NMR (400 MHz, Chloroform-d)  $\delta$  7.56–7.39 (m, 2H), 7.30 (d,  $J$  = 5.4 Hz, 3H), 4.67 (s, 1H), 3.71 (q,  $J$  = 5.7 Hz, 4H), 2.04–1.49 (m, 4H).

<sup>13</sup>C NMR (100 MHz, CDCl<sub>3</sub>)  $\delta$  131.7, 128.4, 128.3, 122.7, 90.1, 84.8, 62.4, 34.9, 28.4.

## Control Experiments and Characterization Data

### Scheme 3a

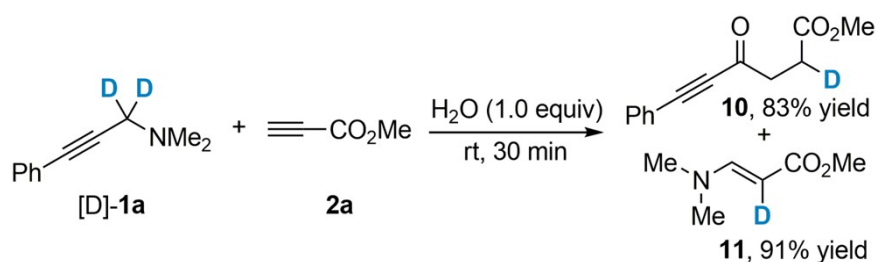

**Synthesis of Compounds 10 and 11:** Under atmospheric stirring conditions, H<sub>2</sub>O (0.5 equiv), amine [D]-**1a** (0.5 mmol), and alkynyl ester **2a** (1.2 mmol) were added in sequence, and then stirred at room temperature for 30 min. Subsequently, the reaction mixture was extracted and separated with a saturated NH<sub>4</sub>Cl solution. The upper organic phase was washed with brine and dried with Na<sub>2</sub>SO<sub>4</sub>, then filtered, and the solvent was removed in a rotary evaporator. The residue was purified by flash chromatography (5–10% ethyl acetate in petroleum ether) to provide the desired product **10** (179.9 mg, 83% yield) and **11** (58.8 mg, 91% yield).

### Scheme 3b

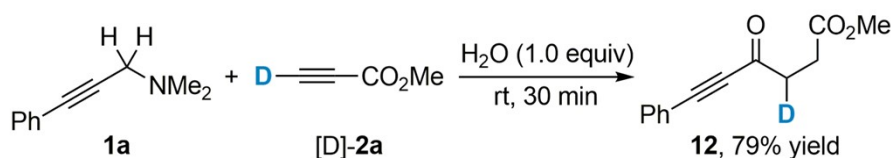

**Synthesis of Compound 12:** Under atmospheric stirring conditions, H<sub>2</sub>O (0.5 equiv), amine **1a** (0.5 mmol), and alkynyl ester [D]-**2a** (1.2 mmol) were added in sequence, and then stirred at room temperature for 30 min. Subsequently, the reaction mixture was extracted and separated with a saturated NH<sub>4</sub>Cl solution. The upper organic phase was washed with brine and dried with Na<sub>2</sub>SO<sub>4</sub>, then filtered, and the solvent was removed in a rotary evaporator. The residue was purified by flash chromatography (5–10% ethyl acetate in petroleum ether) to provide the desired product **12** (171.3 mg, 79% yield).

### Scheme 3c

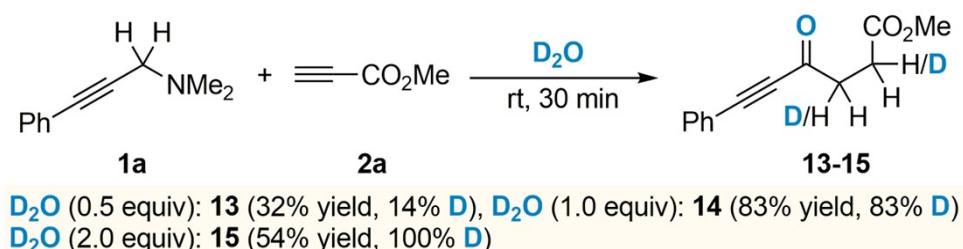

**Synthesis of Compounds 13–15:** Under atmospheric stirring conditions, D<sub>2</sub>O (0.5equiv/ 1.0 equiv/2.0 equiv), amine **1a** (0.5 mmol), and alkynyl ester **2a** (1.2 mmol) were added in sequence, and then stirred at room temperature for 30 min. Subsequently, the reaction mixture was extracted and separated with a saturated

NH<sub>4</sub>Cl solution. The upper organic phase was washed with brine and dried with Na<sub>2</sub>SO<sub>4</sub>, then filtered, and the solvent was removed in a rotary evaporator. The residue was purified by flash chromatography (5–10% ethyl acetate in petroleum ether) to provide the desired product **13–15**.



## Characterization Data

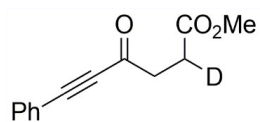

Purified by silica gel column chromatography (5–10% ethyl acetate in petroleum ether) afforded **10** (179.9 mg, 83% yield) as yellow oil.

$^1\text{H NMR}$  (400 MHz, Chloroform-d)  $\delta$  7.61–7.46 (m, 2H), 7.45–7.39 (m, 1H), 7.38–7.26 (m, 2H), 3.65 (s, 3H), 3.11–2.84 (m, 2H), 2.76–2.56 (m, 1H).

$^1\text{H NMR}$  (400 MHz,  $\text{CDCl}_3$ ) spectrum of compound **10**

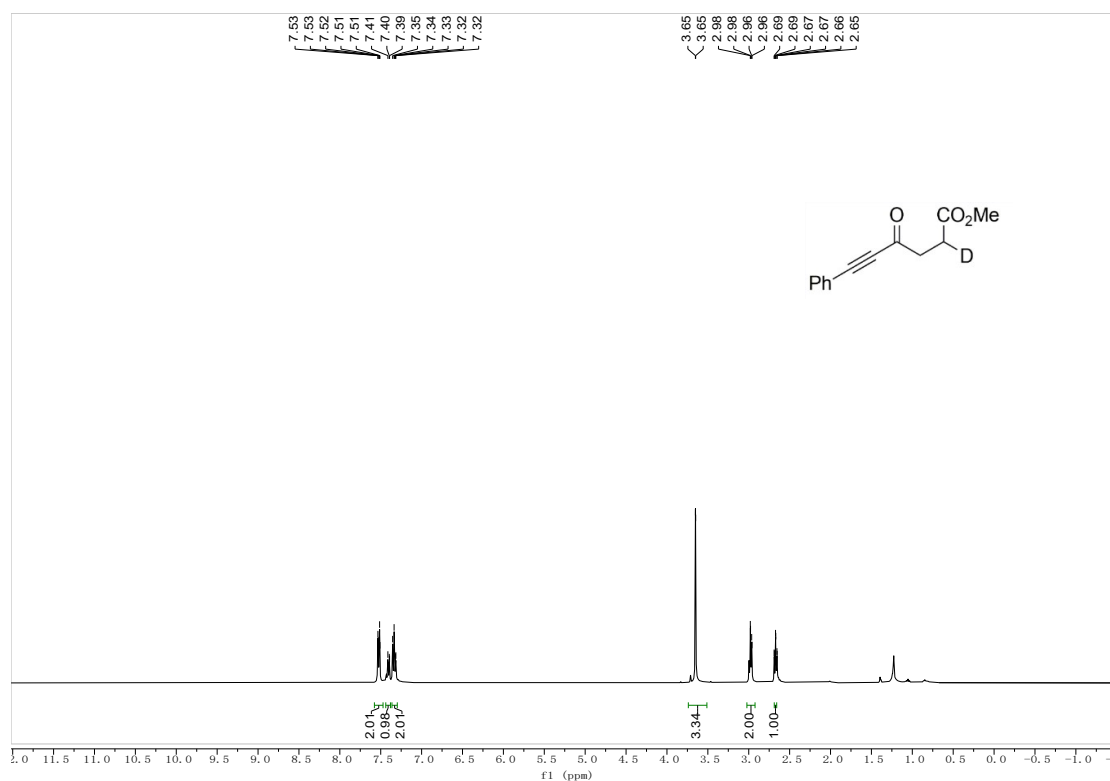

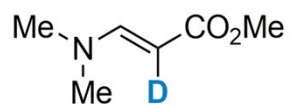

Purified by silica gel column chromatography (5–10% ethyl acetate in petroleum ether) afforded **11** (58.8 mg, 91% yield) as yellow oil.

$^1\text{H NMR}$  (400 MHz, Chloroform-d)  $\delta$  7.11 (s, 1H), 3.44 (s, 3H), 2.14 (s, 6H).

$^1\text{H NMR}$  (400 MHz,  $\text{CDCl}_3$ ) spectrum of compound **11**

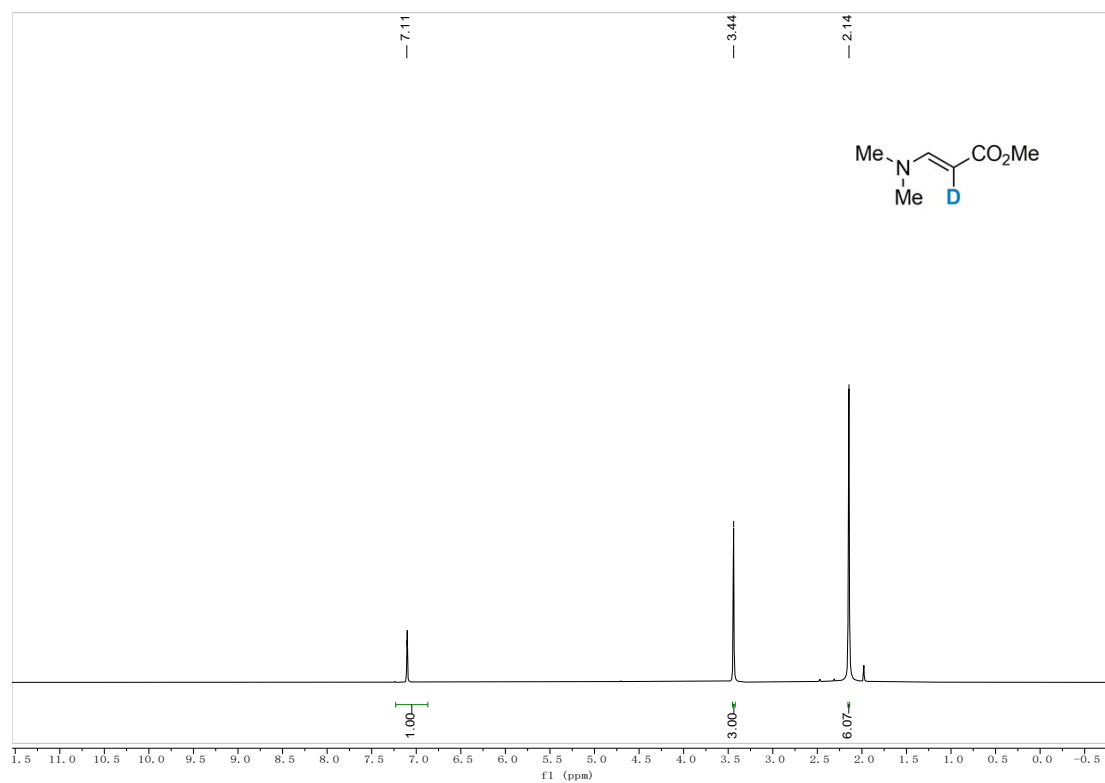

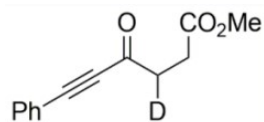

Purified by silica gel column chromatography (5–10% ethyl acetate in petroleum ether) afforded **12** (171.3 mg, 79% yield) as yellow oil.

$^1\text{H NMR}$  (400 MHz, Chloroform- $d$ )  $\delta$  7.61–7.54 (m, 2H), 7.50–7.44 (m, 1H), 7.43–7.35 (m, 2H), 3.72 (s, 3H), 3.22–2.92 (m, 1H), 2.83–2.59 (m, 2H).

$^1\text{H NMR}$  (400 MHz,  $\text{CDCl}_3$ ) spectrum of compound **12**

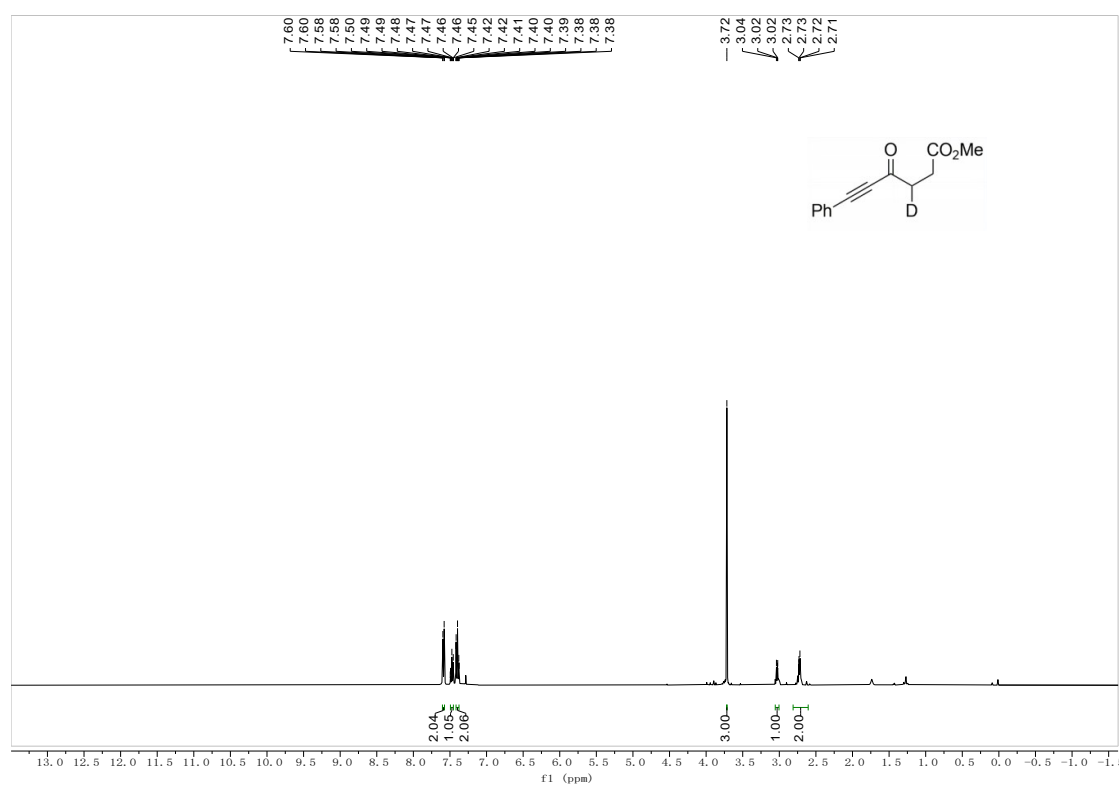

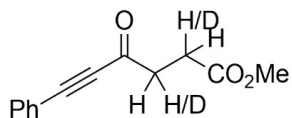

Purified by silica gel column chromatography (5–10% ethyl acetate in petroleum ether) afforded **13** (69.5 mg, 32% yield) as yellow oil.

$^1\text{H NMR}$  (400 MHz, Chloroform- $d$ )  $\delta$  7.63–7.56 (m, 2H), 7.51–7.45 (m, 1H), 7.44–7.37 (m, 2H), 3.72 (s, 3H), 3.05 (t,  $J = 6.7$  Hz, 1.86 H), 2.74 (t,  $J = 6.8$  Hz, 1.86 H).

$^1\text{H NMR}$  (400 MHz,  $\text{CDCl}_3$ ) spectrum of compound **13**

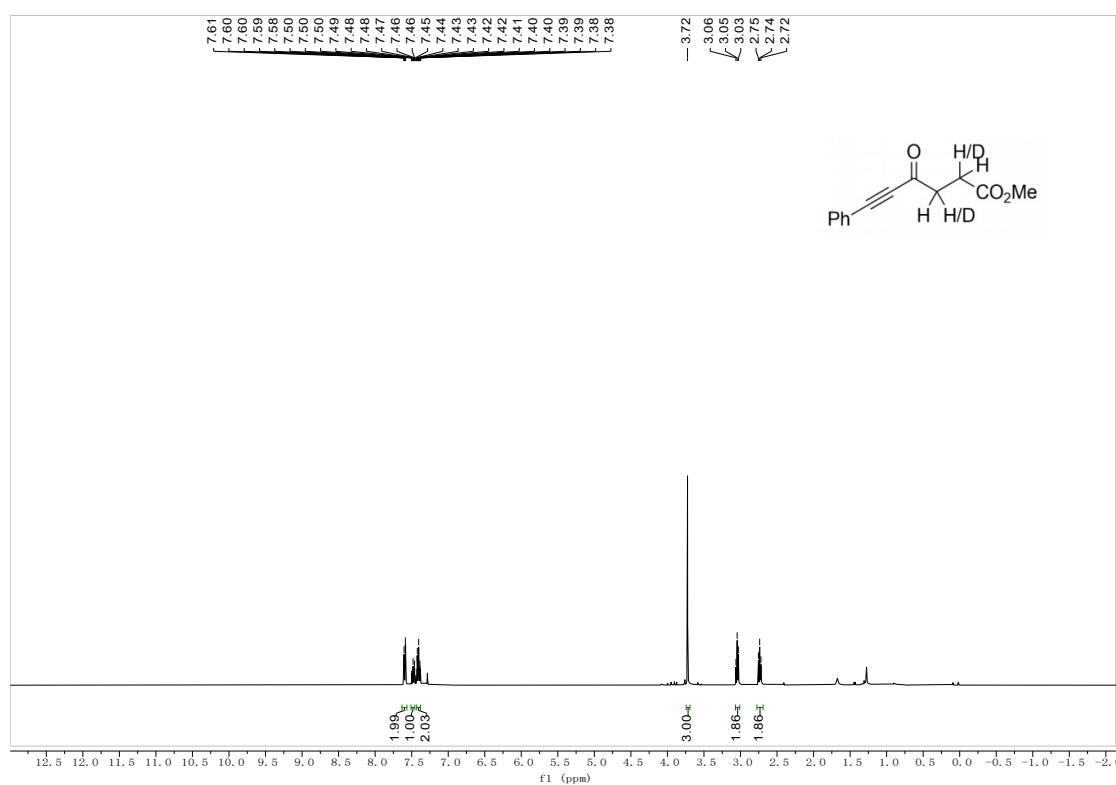

Purified by silica gel column chromatography (5–10% ethyl acetate in petroleum ether) afforded **14** (180.1 mg, 83% yield) as yellow oil.

$^1\text{H NMR}$  (400 MHz, Chloroform- $d$ )  $\delta$  7.64–7.34 (m, 5H), 3.72 (s, 3H), 3.04 (t,  $J = 6.6$  Hz, 1.57 H), 2.73 (t,  $J = 6.7$  Hz, 1.57 H).

$^1\text{H NMR}$  (400 MHz,  $\text{CDCl}_3$ ) spectrum of compound **14**

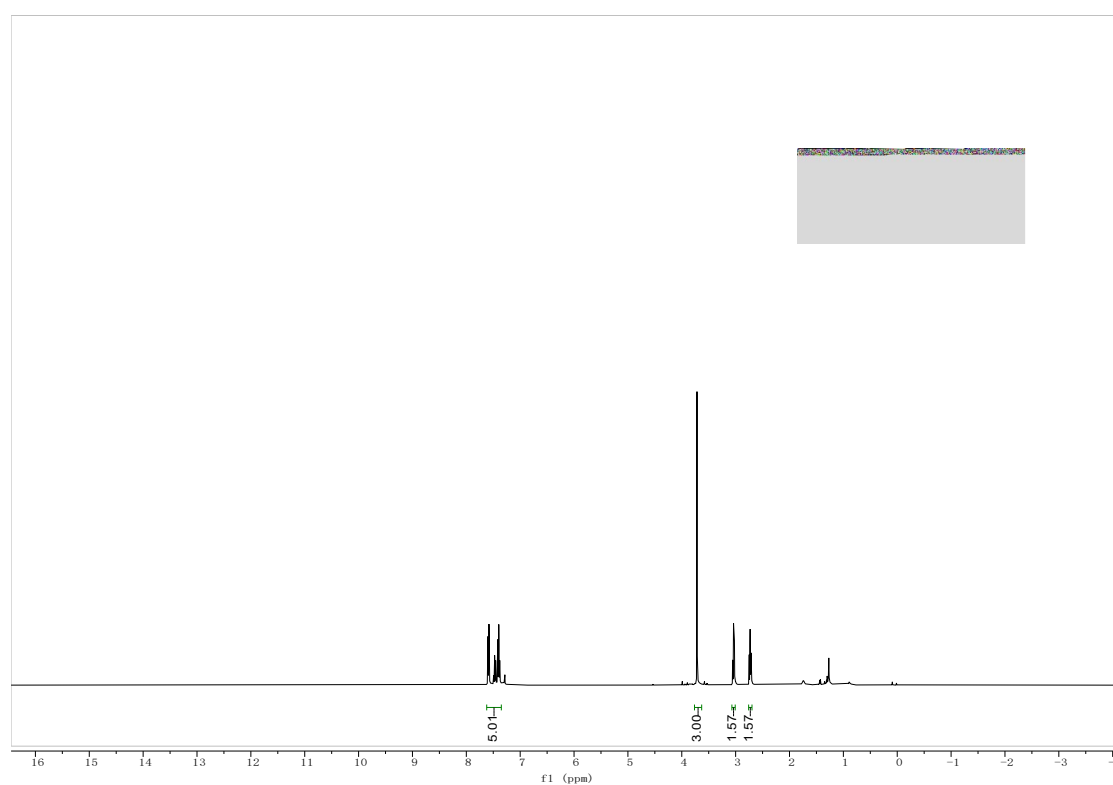

Purified by silica gel column chromatography (5–10% ethyl acetate in petroleum ether) afforded **15** (117.2 mg, 54% yield) as yellow oil.

$^1\text{H NMR}$  (400 MHz, Chloroform-d)  $\delta$  7.95–6.77 (m, 5H), 3.72 (s, 3H), 3.14–2.93 (m, 1H), 2.80–2.59 (m, 1H).

$^1\text{H NMR}$  (400 MHz,  $\text{CDCl}_3$ ) spectrum of compound **15**

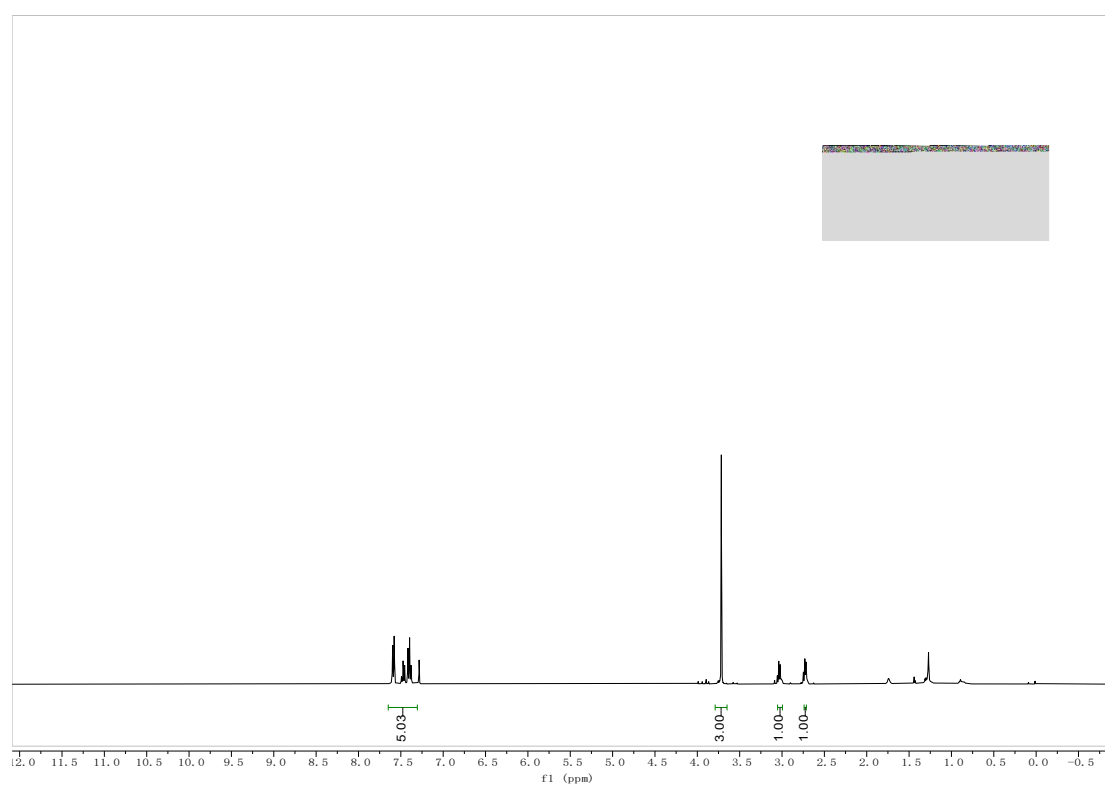

## References

- [1] N. Parvin, N. Sen, S. Tothadi, S. Muhammed, P. Parameswaran, and S. Khan, *Organometal.*, 2020, **40**, 1626–1632.
- [2] Q. Shen, L. Zhang, Y. R. Zhou and J. X. Li, *Tetrahedron Lett.*, 2013, **54**, 6725–6728.
- [3] Z. W. Xu, X. Q. Yu, X. J. Feng and M. Bao, *J. Org. Chem.*, 2011, **76**, 6901–6905.
- [4] I. Fish, A. Stößel, K. Eitel, C. Valant, S. Albold, H. Huebner, D. Möller, M. J. Clark, R. K. Sunahara, A. Christopoulos, B. K. S. Orcid and P. Gmeiner, *J. Med. Chem.*, 2017, **60**, 9239–9250.
- [5] H. Helbert, P. Visser, J. G. H. Hermens, J. Buter and B. L. Feringa, *Nat. Catal.*, 2020, **3**, 664–671.
- [6] M. Lemhadri, H. Doucet and M. Santelli, *Synthesis*, 2005, **8**, 1359–1367.
- [7] V. S. Rawat, T. Bathini, S. Govardan and B. Sreedhar, *Org. Biomol. Chem.*, 2014, **12**, 6725–6729.
- [8] L. W. Bieber and M. F. Silva, *Tetrahedron Lett.*, 2004, **45**, 8281–8283.
- [9] Z. J. Fang and M. Wills, *J. Org. Chem.*, 2013, **78**, 8594–8605.
- [10] X. B. Chen, Y. N. Zhang, H. X. Wan, W. Wang and S. L. Zhang, *Chem. Commun.*, 2016, **52**, 3532–3535

# $^1\text{H}$ NMR, $^{13}\text{C}$ NMR and $^{19}\text{F}$ NMR spectra

$^1\text{H}$  NMR (400 MHz,  $\text{CDCl}_3$ ) spectrum of compound **1a**

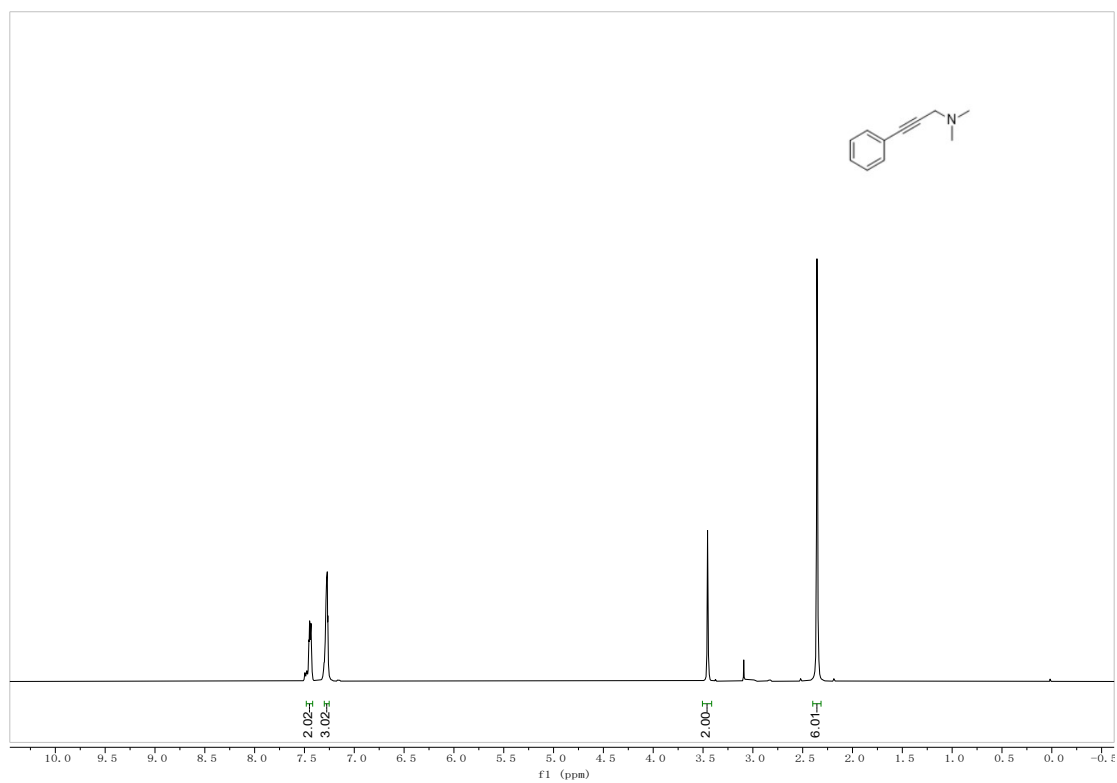

$^1\text{H}$  NMR (400 MHz,  $\text{CDCl}_3$ ) spectrum of compound **1b**

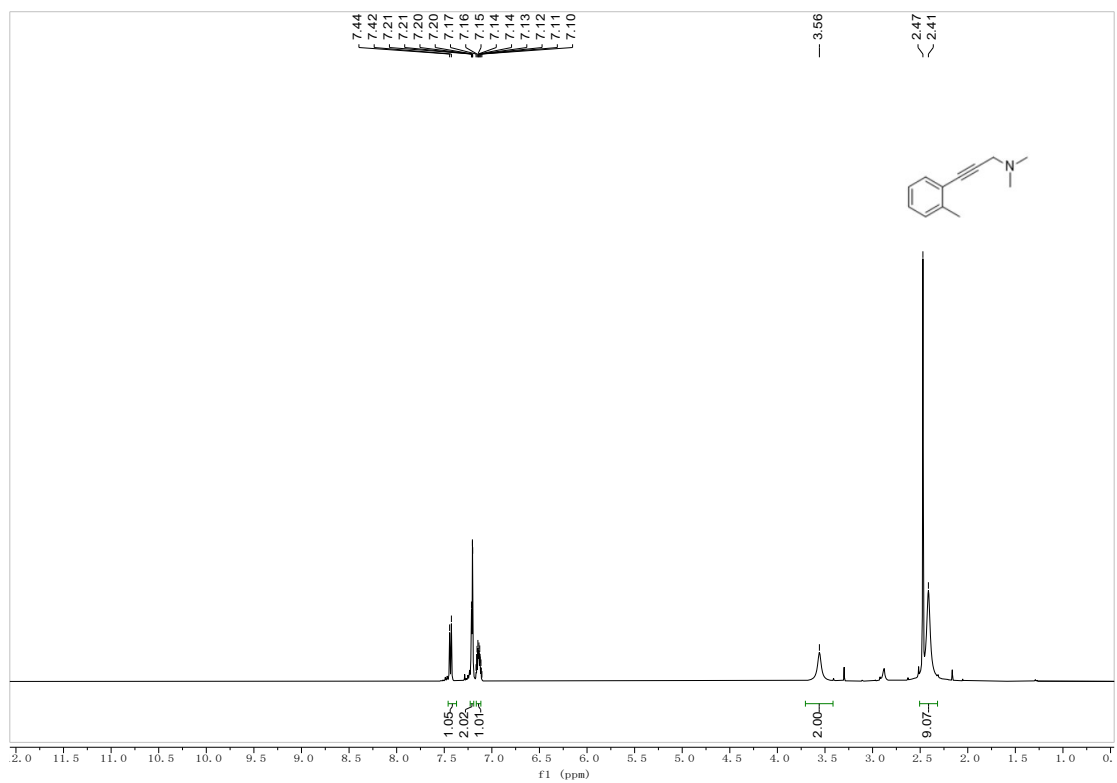



$^{13}\text{C}$  NMR (100 MHz,  $\text{CDCl}_3$ ) spectrum of compound **1b**

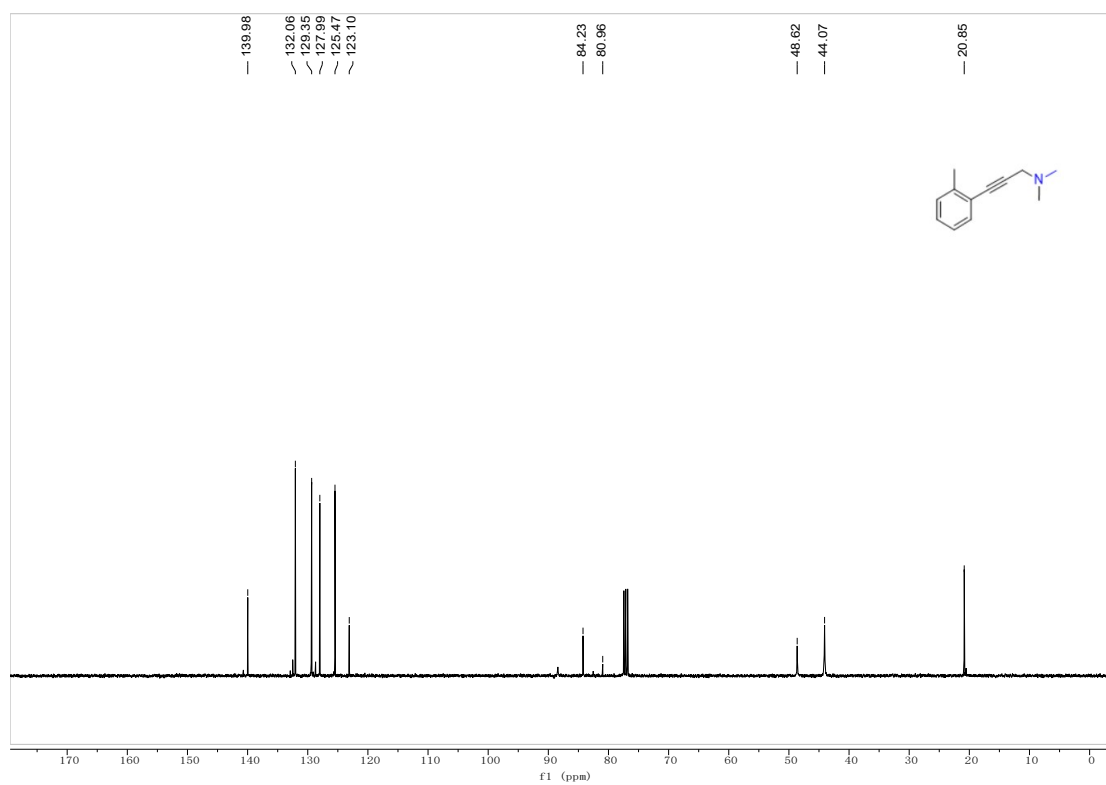

$^1\text{H}$  NMR (400 MHz,  $\text{CDCl}_3$ ) spectrum of compound **1c**

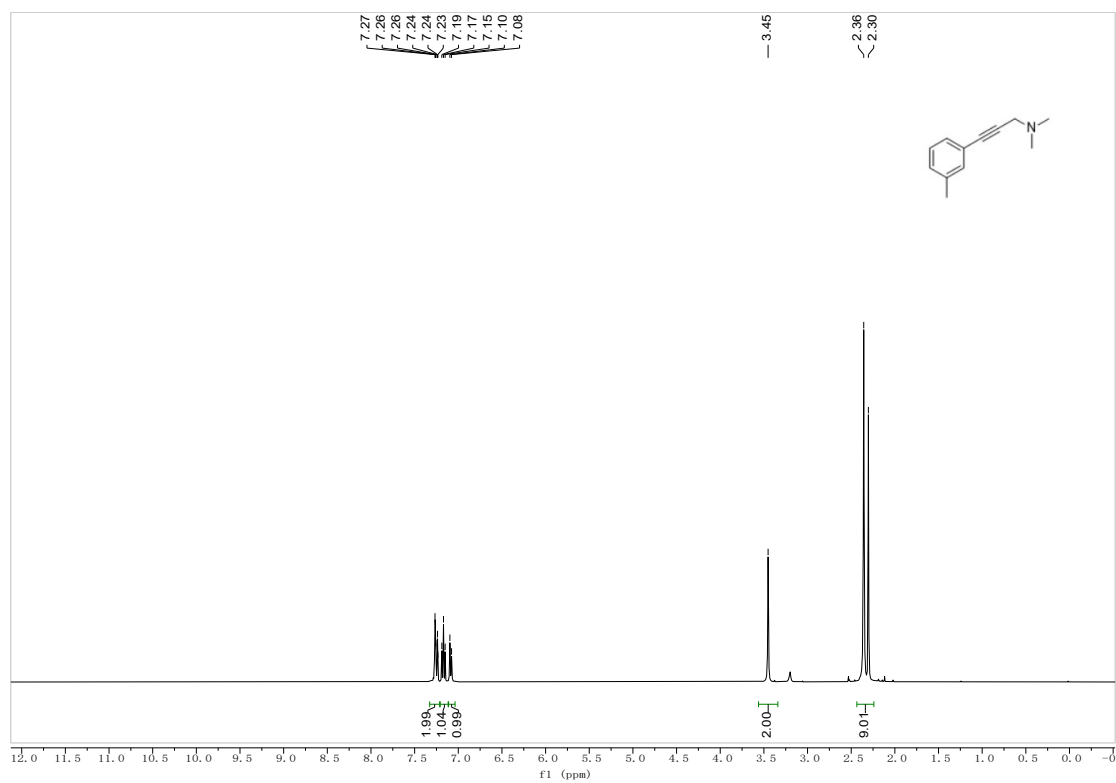

$^1\text{H}$  NMR (400 MHz,  $\text{CDCl}_3$ ) spectrum of compound **1d**

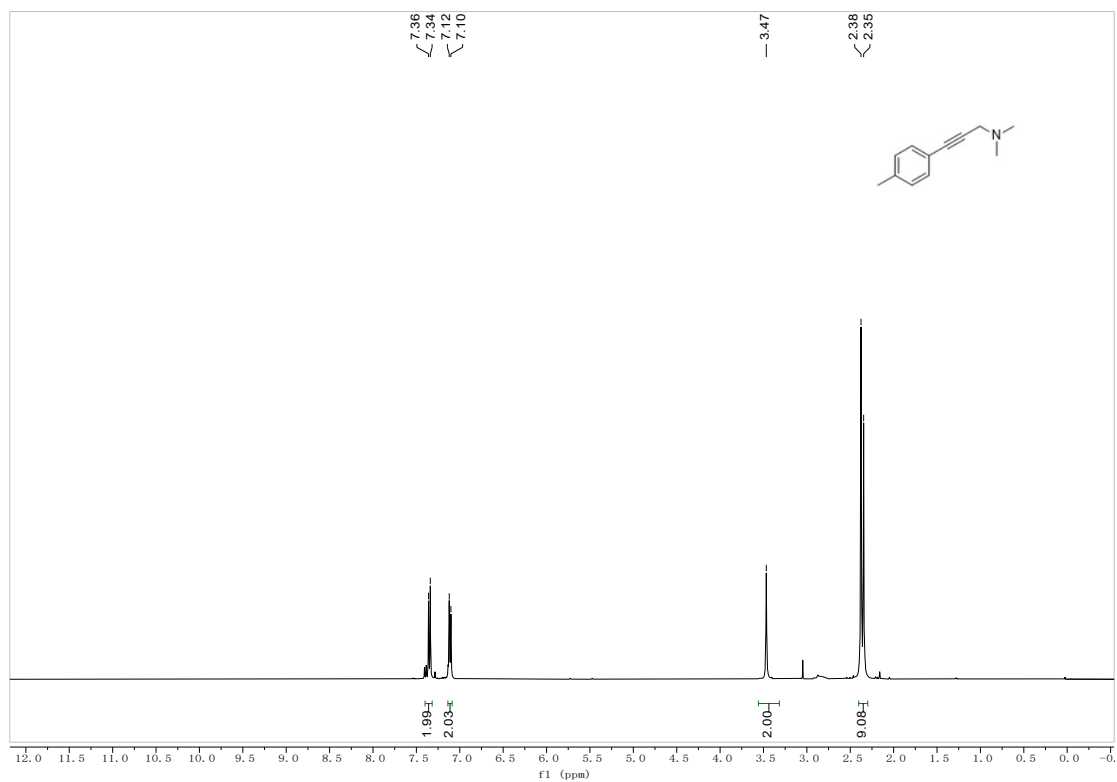

$^1\text{H}$  NMR (400 MHz,  $\text{CDCl}_3$ ) spectrum of compound **1e**

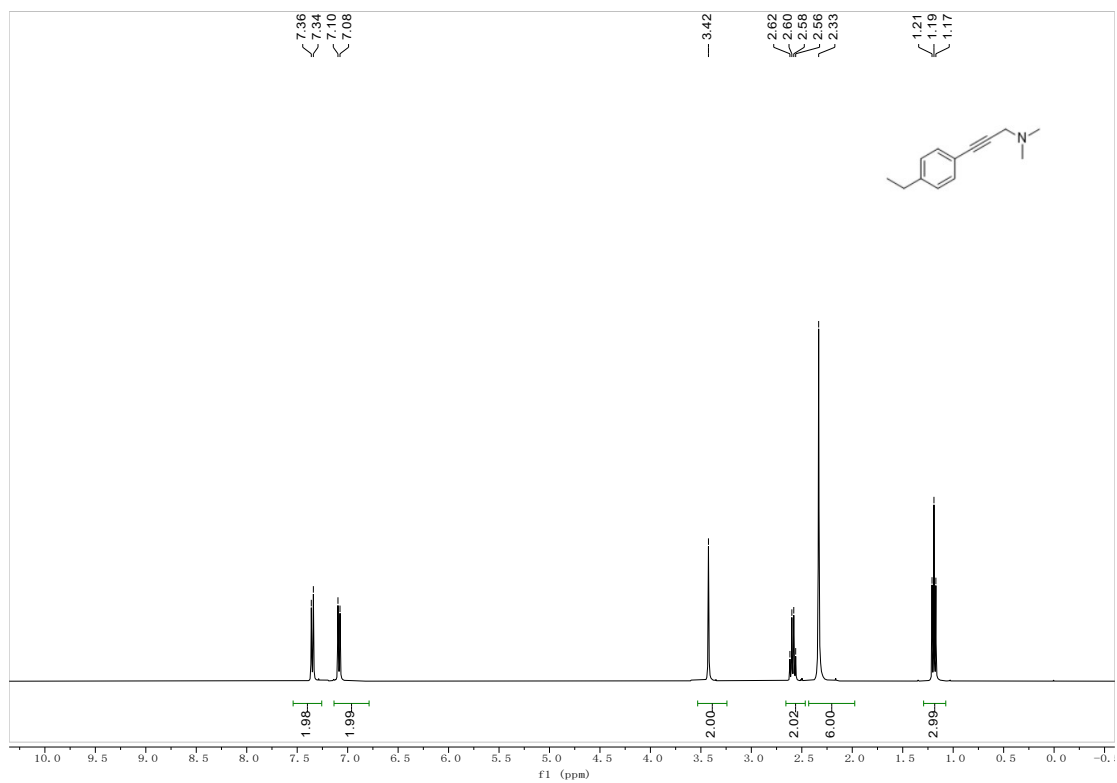

$^{13}\text{C}$  NMR (100 MHz,  $\text{CDCl}_3$ ) spectrum of compound **1e**

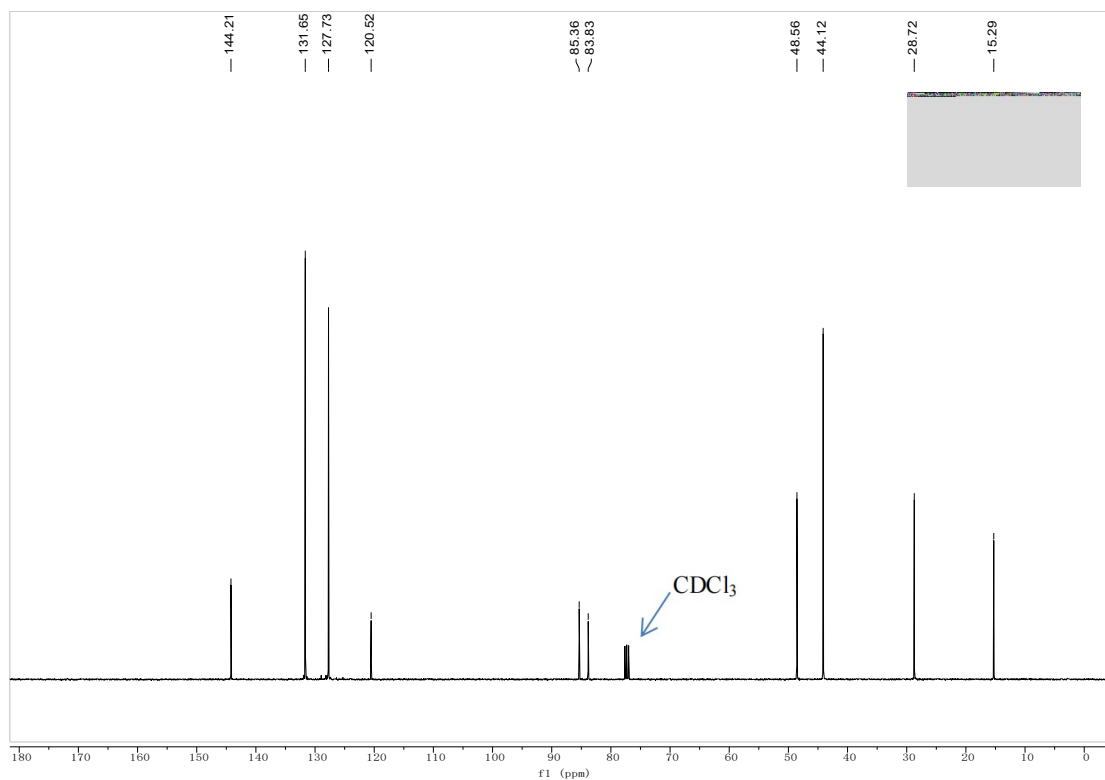

$^{13}\text{C}$  NMR (100 MHz,  $\text{CDCl}_3$ ) spectrum of compound **1f**

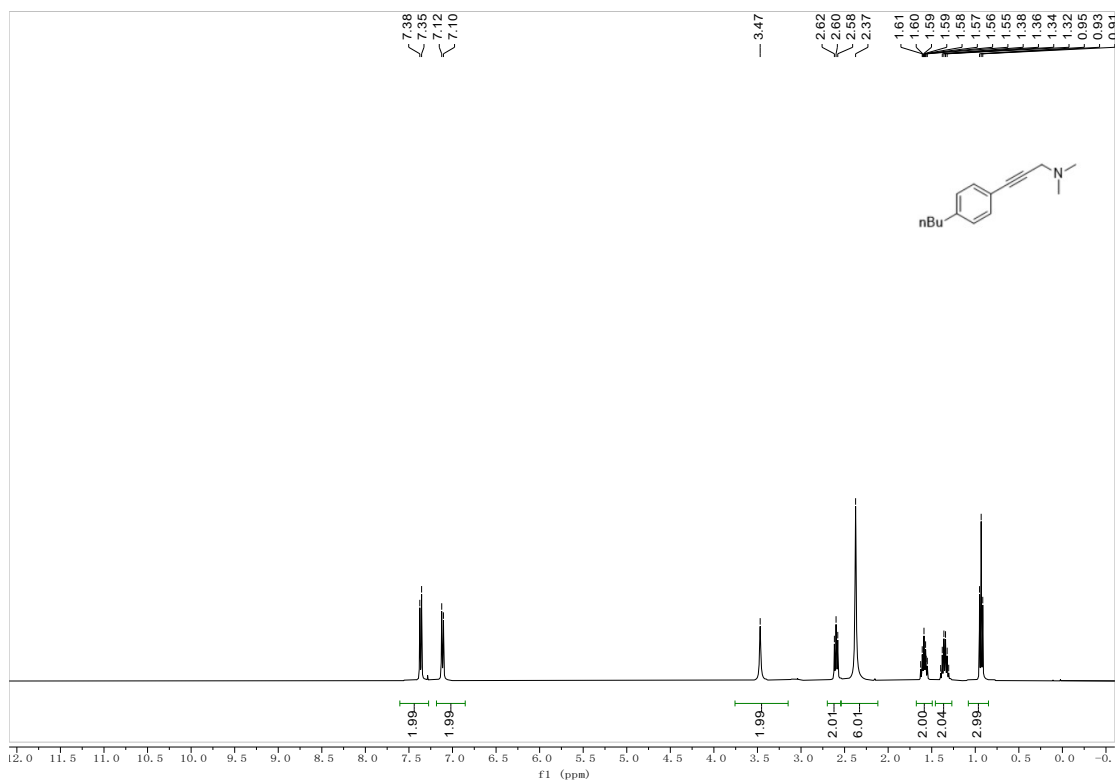

$^1\text{H}$  NMR (400 MHz,  $\text{CDCl}_3$ ) spectrum of compound **1f**

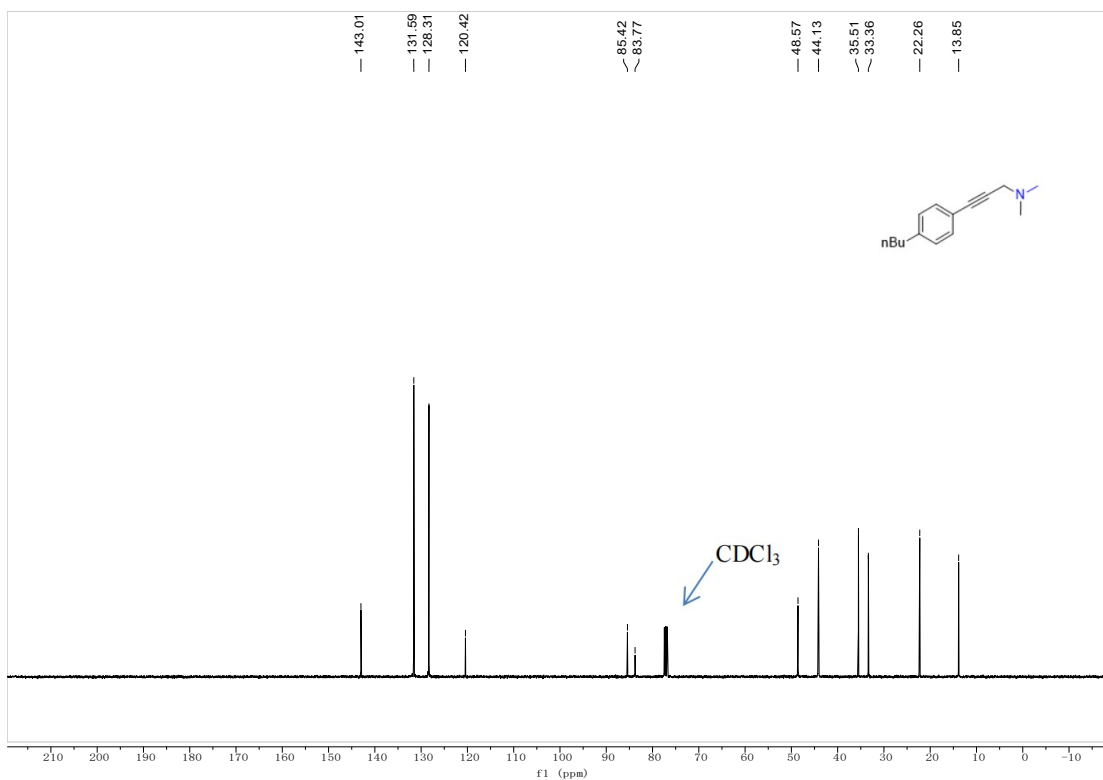

$^1\text{H}$  NMR (400 MHz,  $\text{CDCl}_3$ ) spectrum of compound **1g**

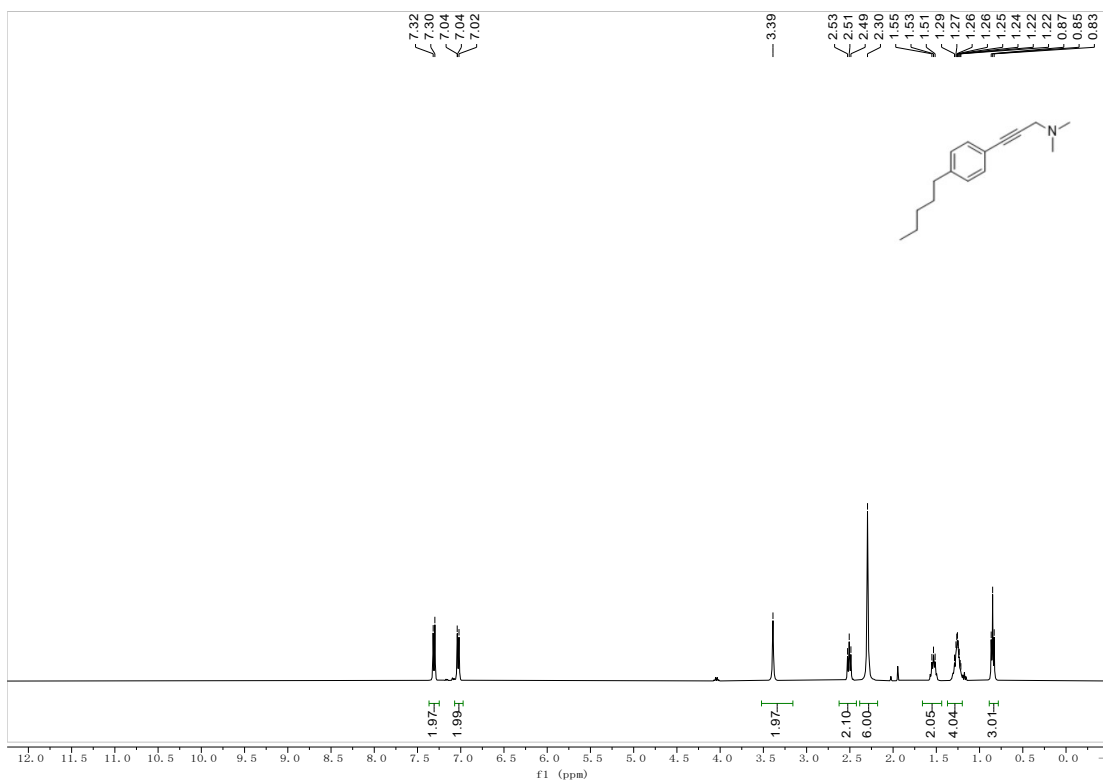

$^{13}\text{C}$  NMR (100 MHz,  $\text{CDCl}_3$ ) spectrum of compound **1g**

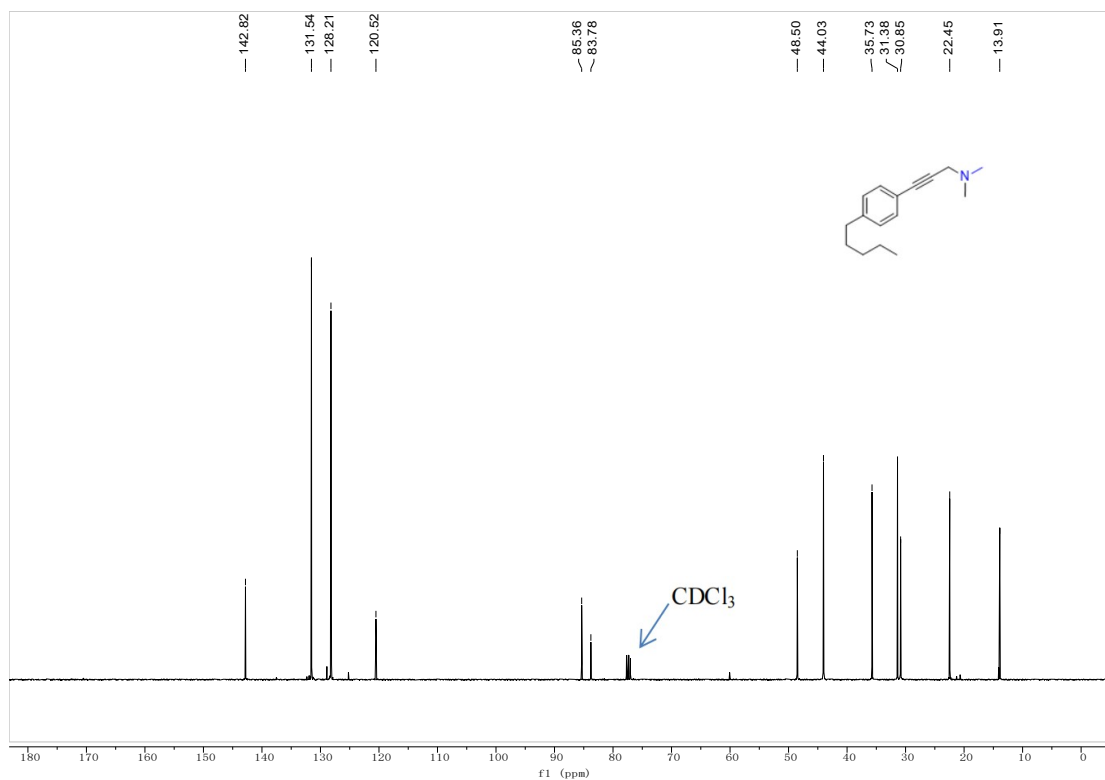

<sup>1</sup>H NMR (400 MHz, CDCl<sub>3</sub>) spectrum of compound **1h**

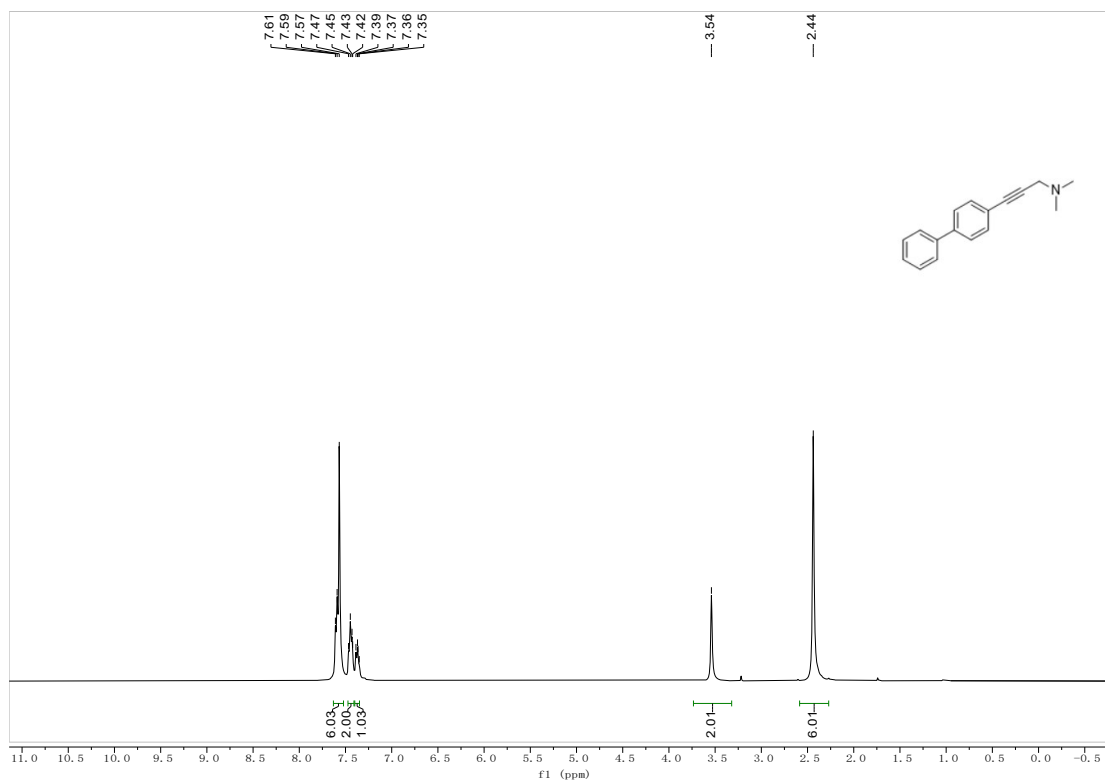

<sup>13</sup>C NMR (100 MHz, CDCl<sub>3</sub>) spectrum of compound **1h**

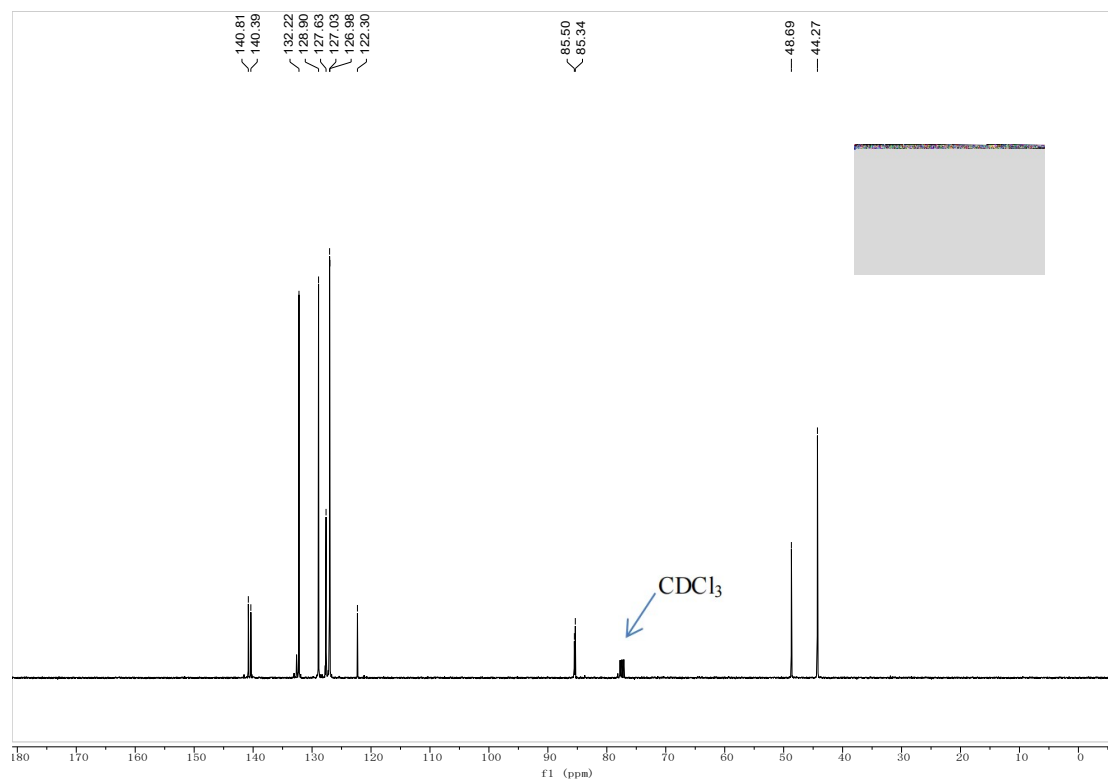

<sup>1</sup>H NMR (400 MHz, CDCl<sub>3</sub>) spectrum of compound **1i**

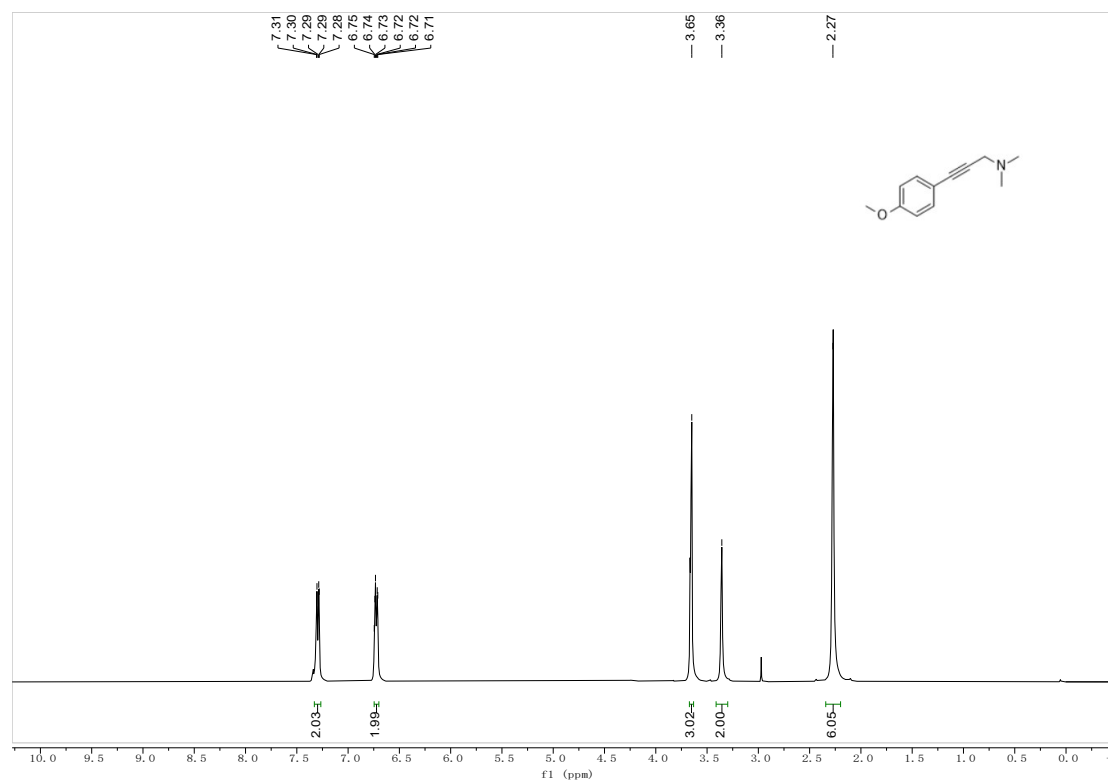

<sup>1</sup>H NMR (400 MHz, CDCl<sub>3</sub>) spectrum of compound **1j**

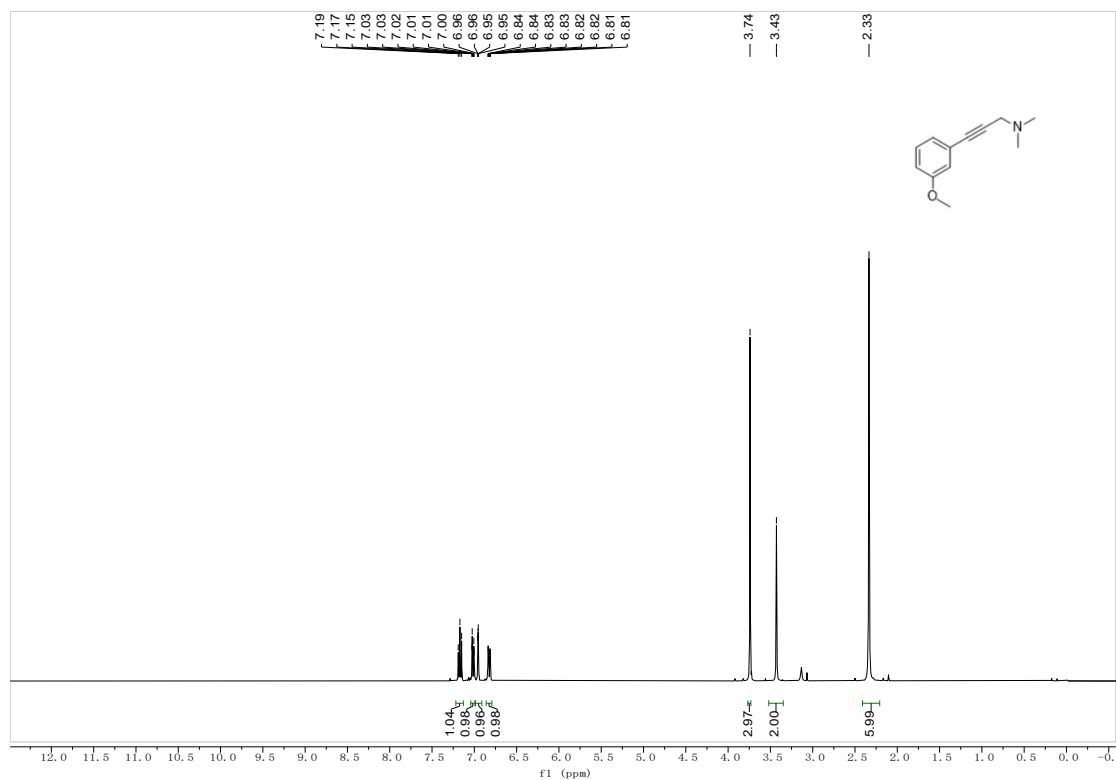

$^1\text{H}$  NMR (400 MHz,  $\text{CDCl}_3$ ) spectrum of compound **1k**

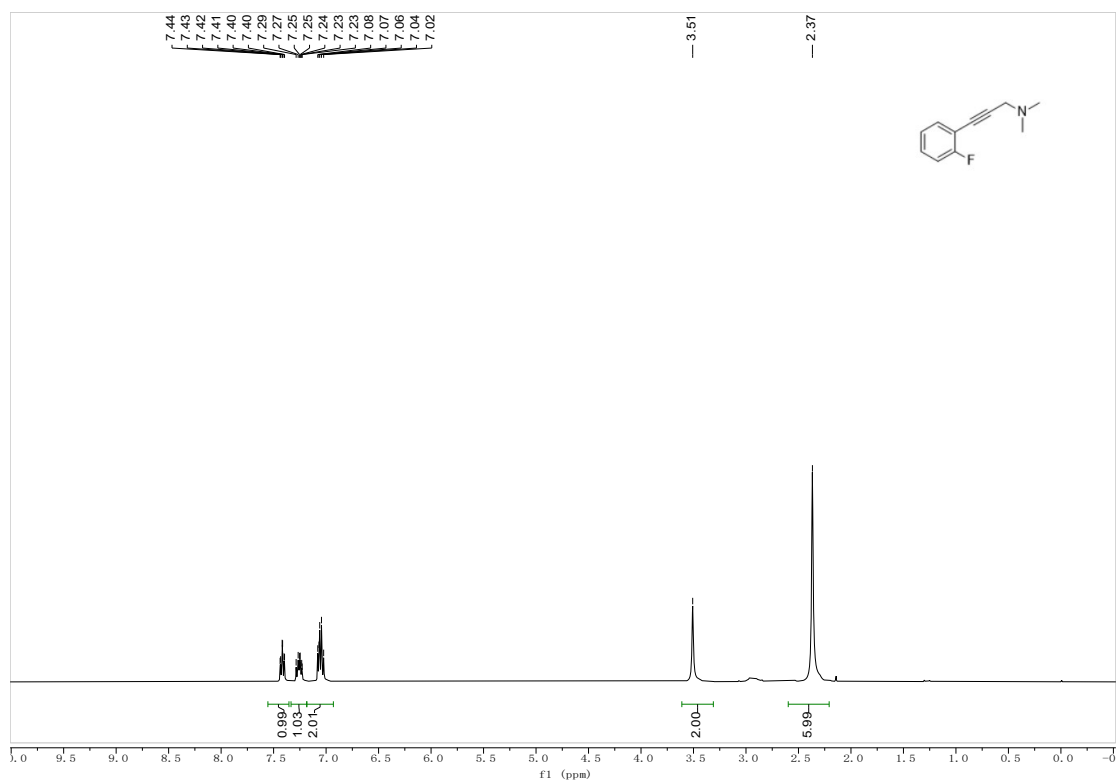

$^1\text{H}$  NMR (400 MHz,  $\text{CDCl}_3$ ) spectrum of compound **1l**

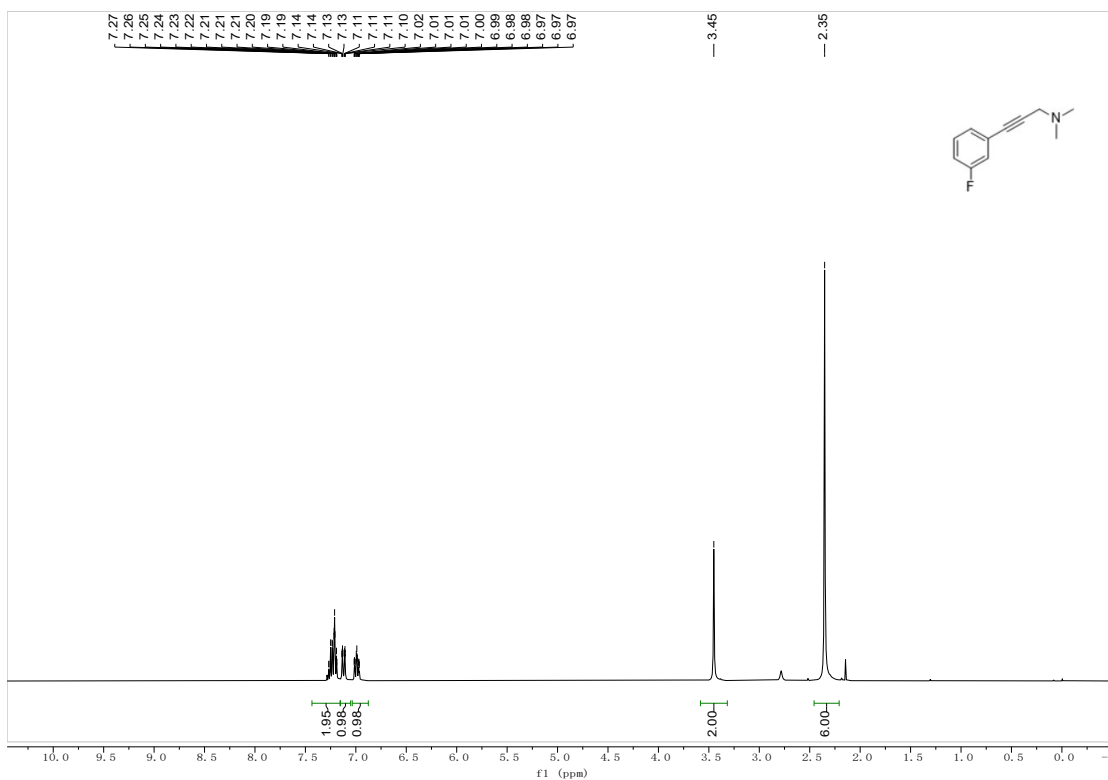

<sup>1</sup>H NMR (400 MHz, CDCl<sub>3</sub>) spectrum of compound **1m**

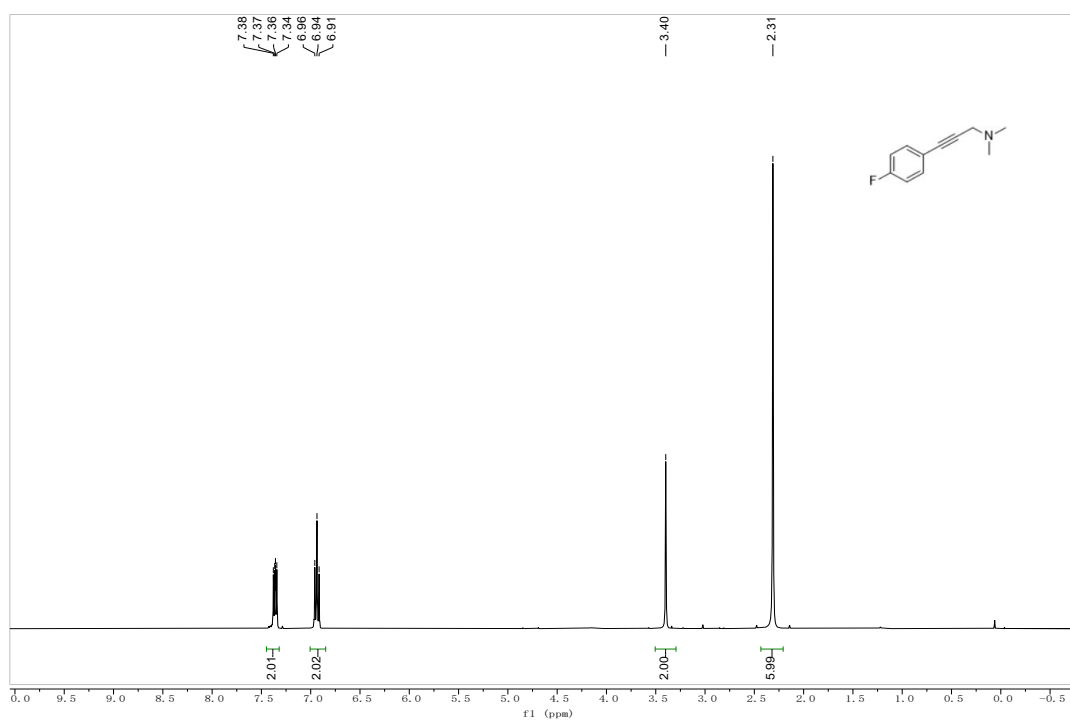

<sup>1</sup>H NMR (400 MHz, CDCl<sub>3</sub>) spectrum of compound **1n**



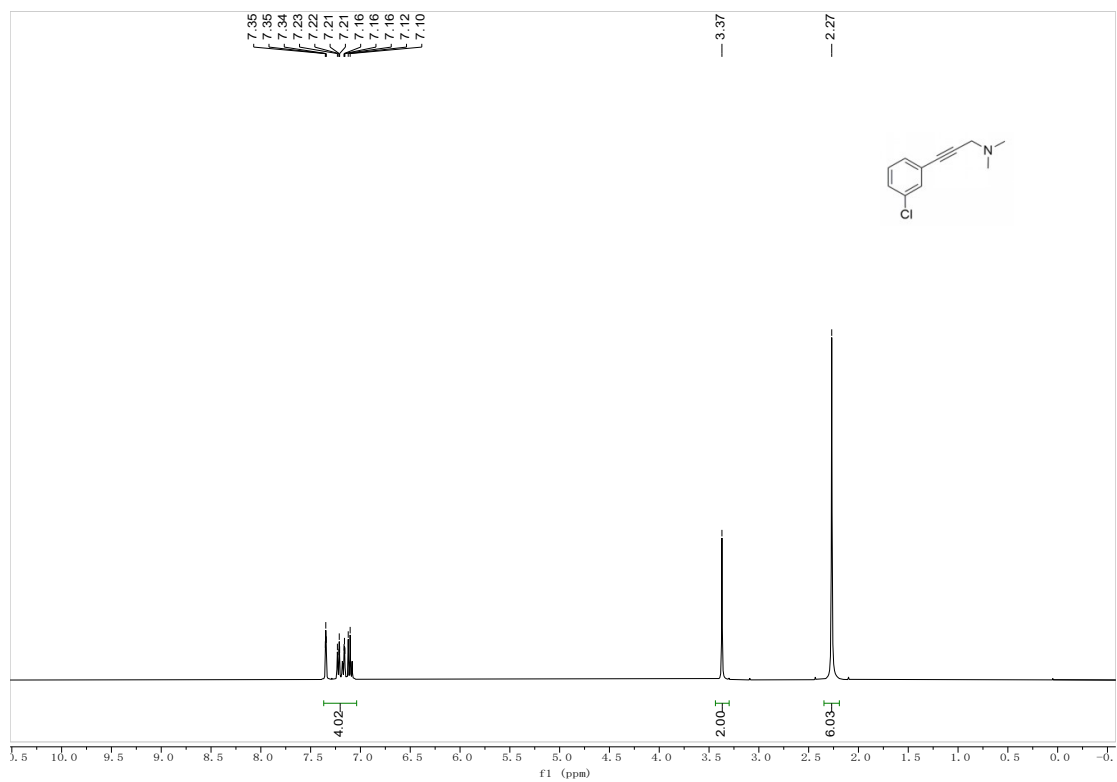

$^{13}\text{C}$  NMR (100 MHz,  $\text{CDCl}_3$ ) spectrum of compound **1n**

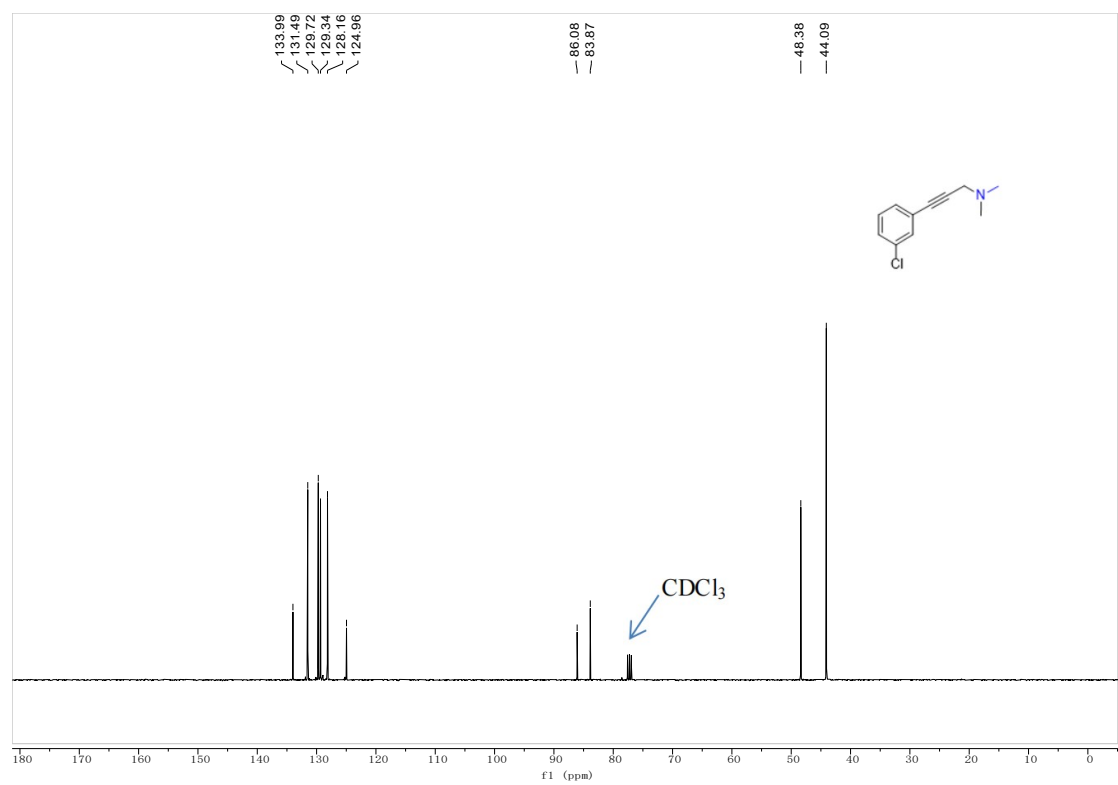

$^1\text{H}$  NMR (400 MHz,  $\text{CDCl}_3$ ) spectrum of compound **1o**

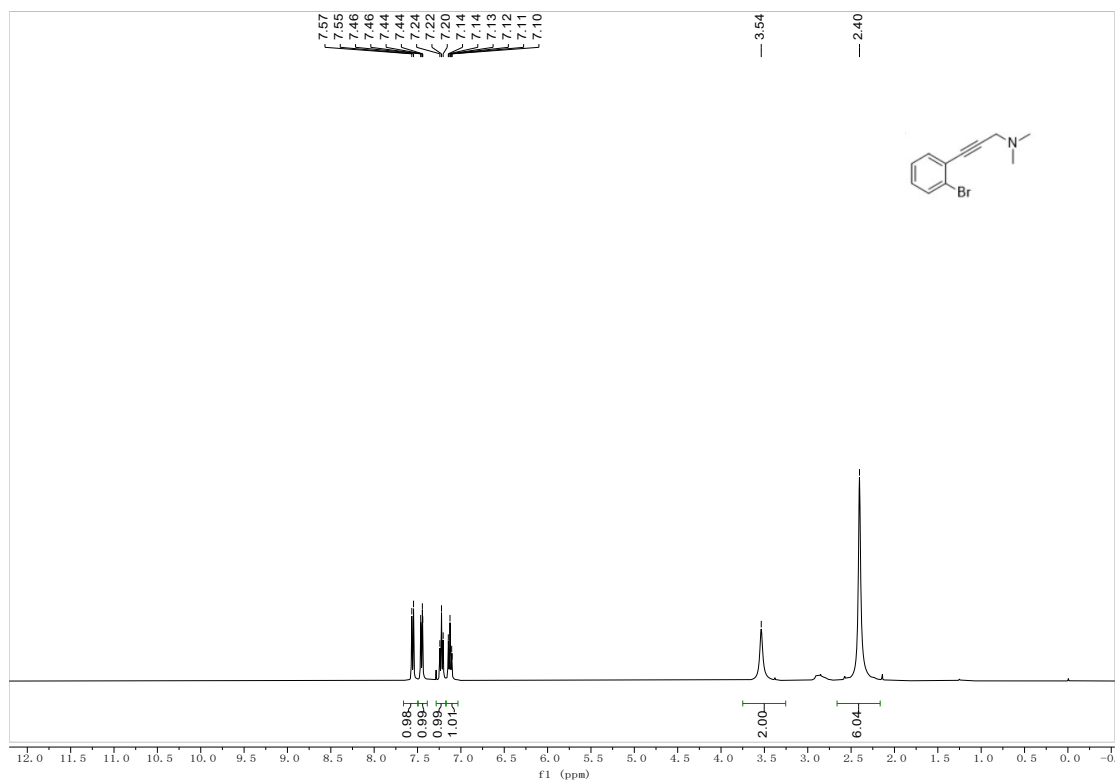

$^{13}\text{C}$  NMR (100 MHz,  $\text{CDCl}_3$ ) spectrum of compound **1o**

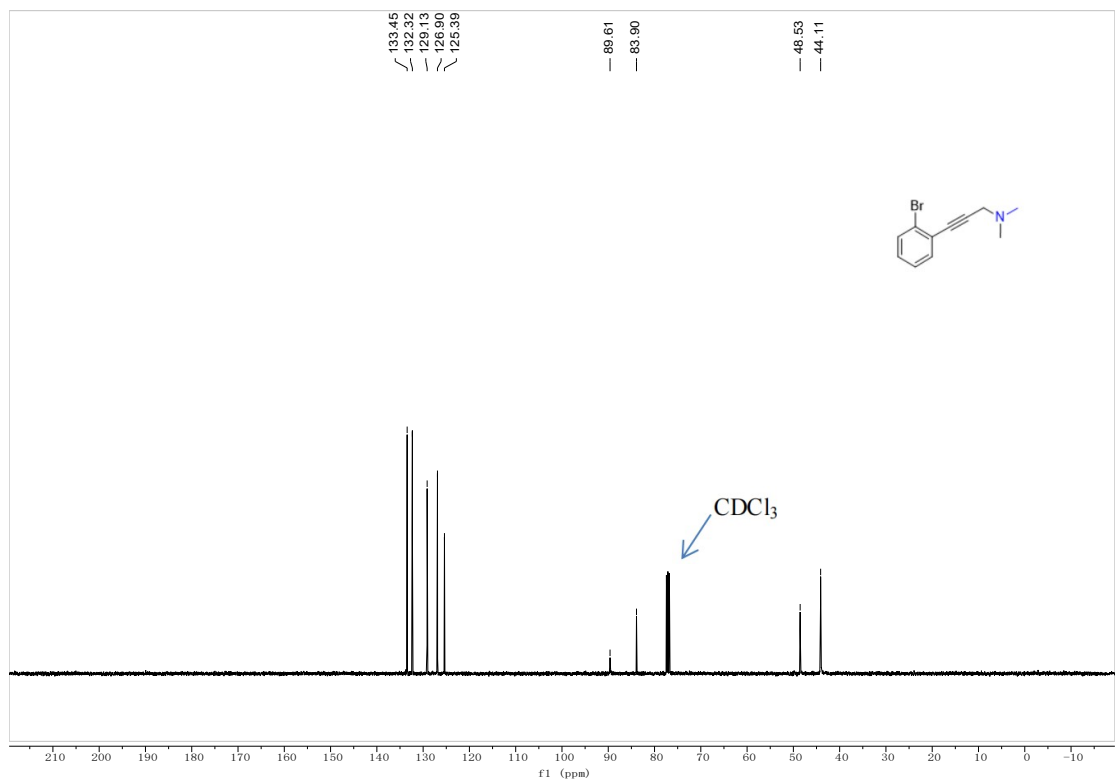

$^1\text{H}$  NMR (400 MHz,  $\text{CDCl}_3$ ) spectrum of compound **1p**

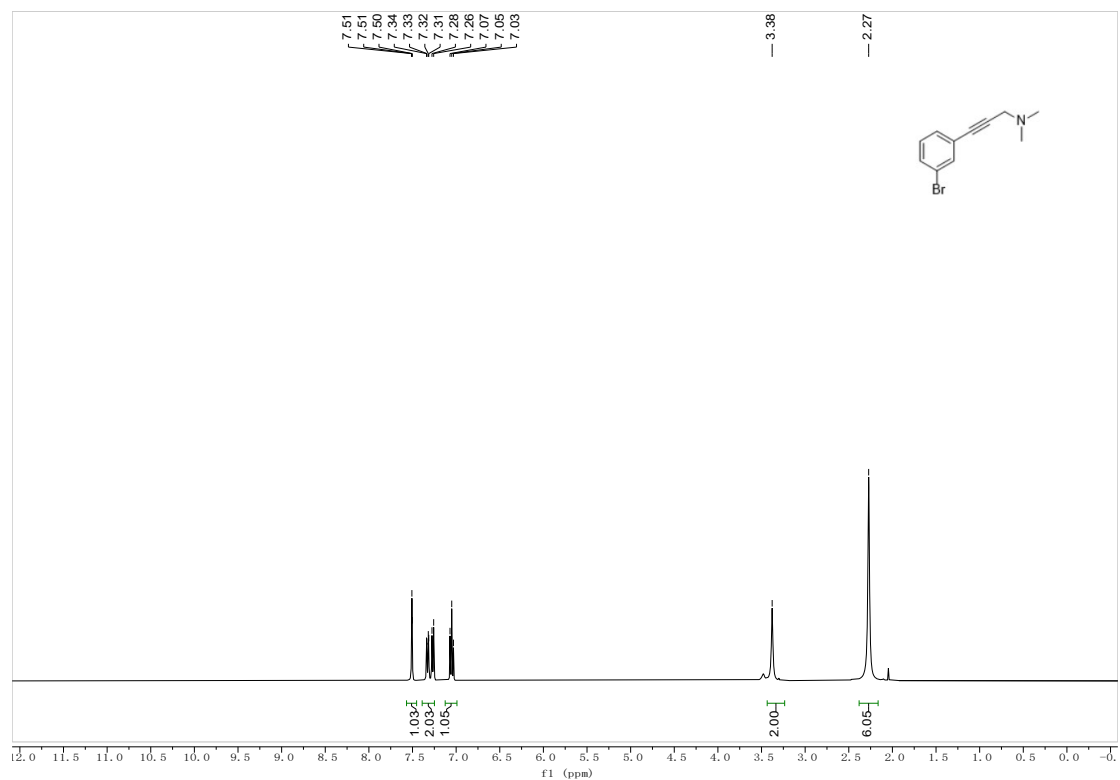

<sup>13</sup>C NMR (100 MHz, CDCl<sub>3</sub>) spectrum of compound **1p**

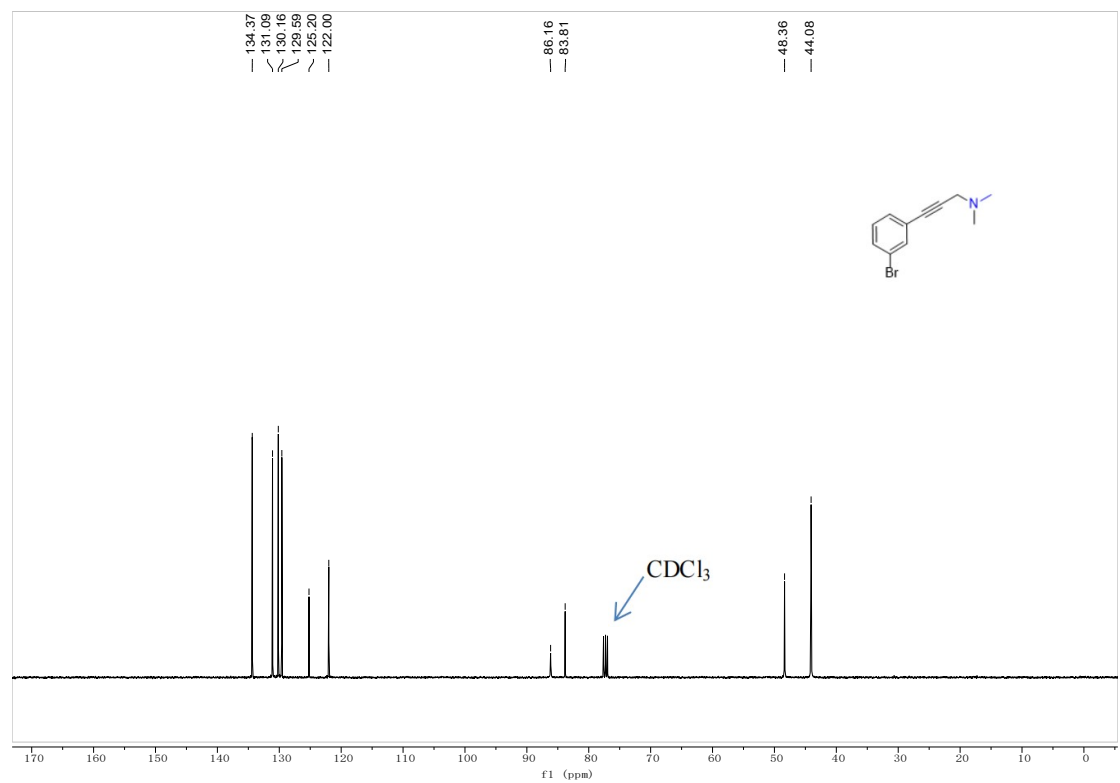

<sup>13</sup>C NMR (100 MHz, CDCl<sub>3</sub>) spectrum of compound **1q**

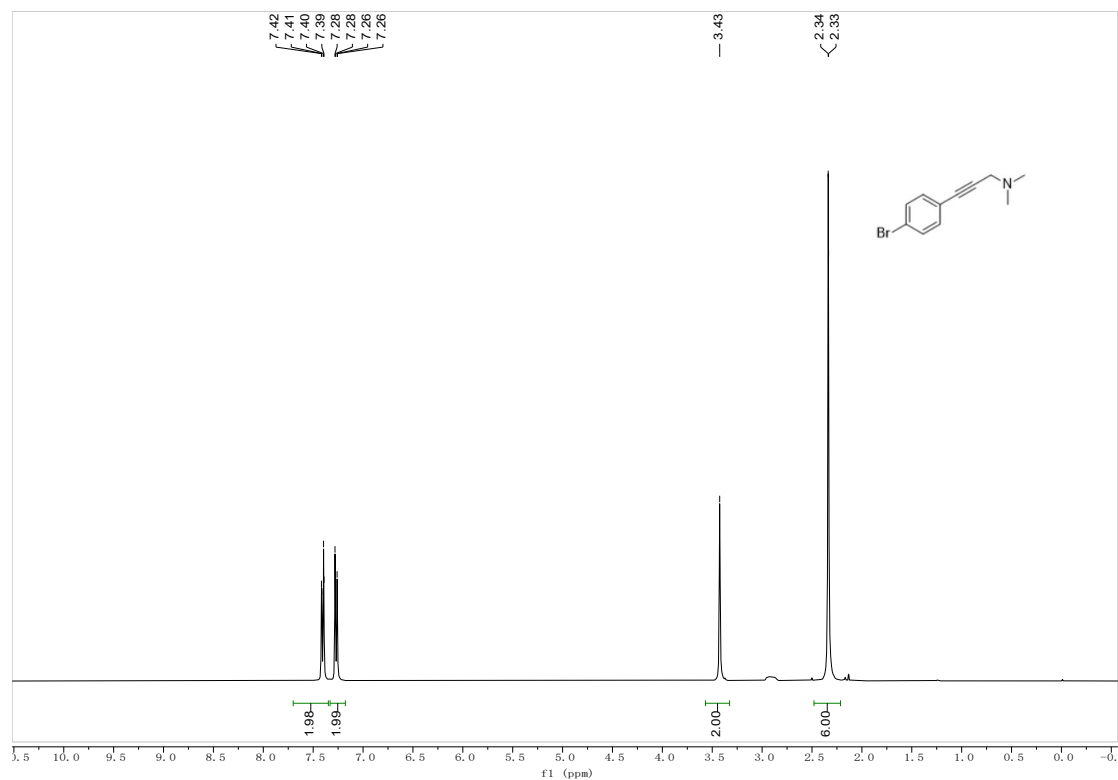

<sup>1</sup>H NMR (400 MHz, CDCl<sub>3</sub>) spectrum of compound **1r**

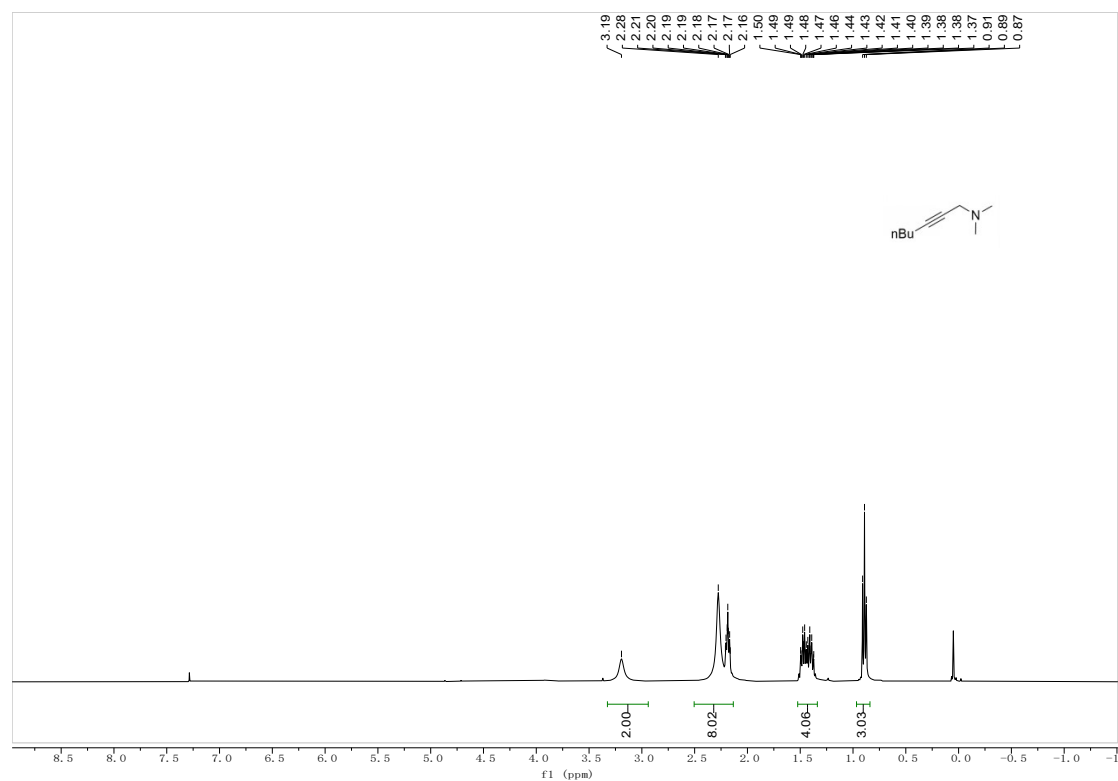

<sup>1</sup>H NMR (400 MHz, CDCl<sub>3</sub>) spectrum of compound **1s**

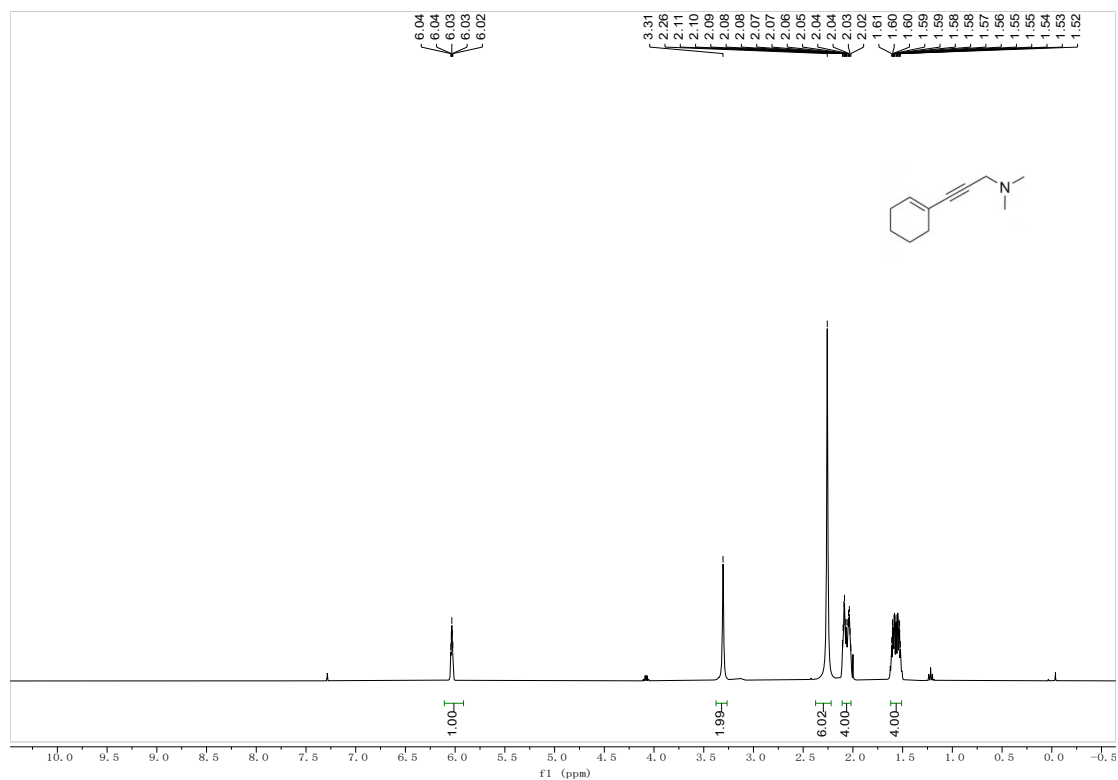

$^{13}\text{C}$  NMR (100 MHz,  $\text{CDCl}_3$ ) spectrum of compound **1s**

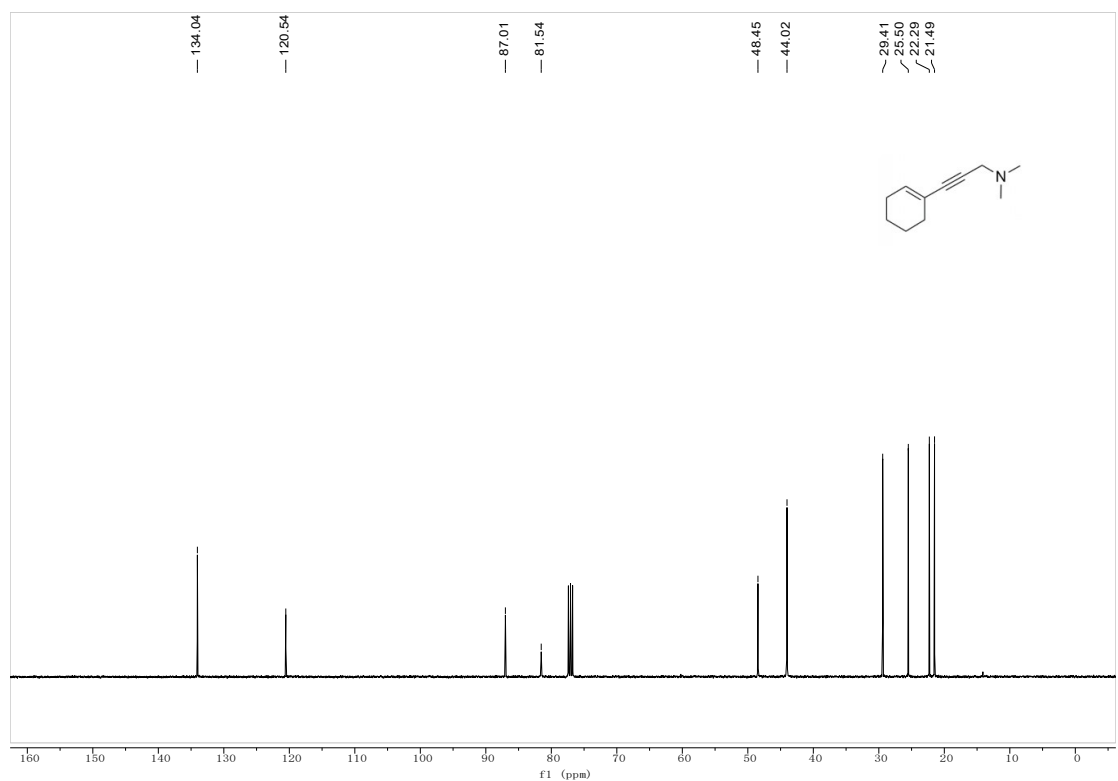

$^1\text{H}$  NMR (400 MHz,  $\text{CDCl}_3$ ) spectrum of compound **3a**

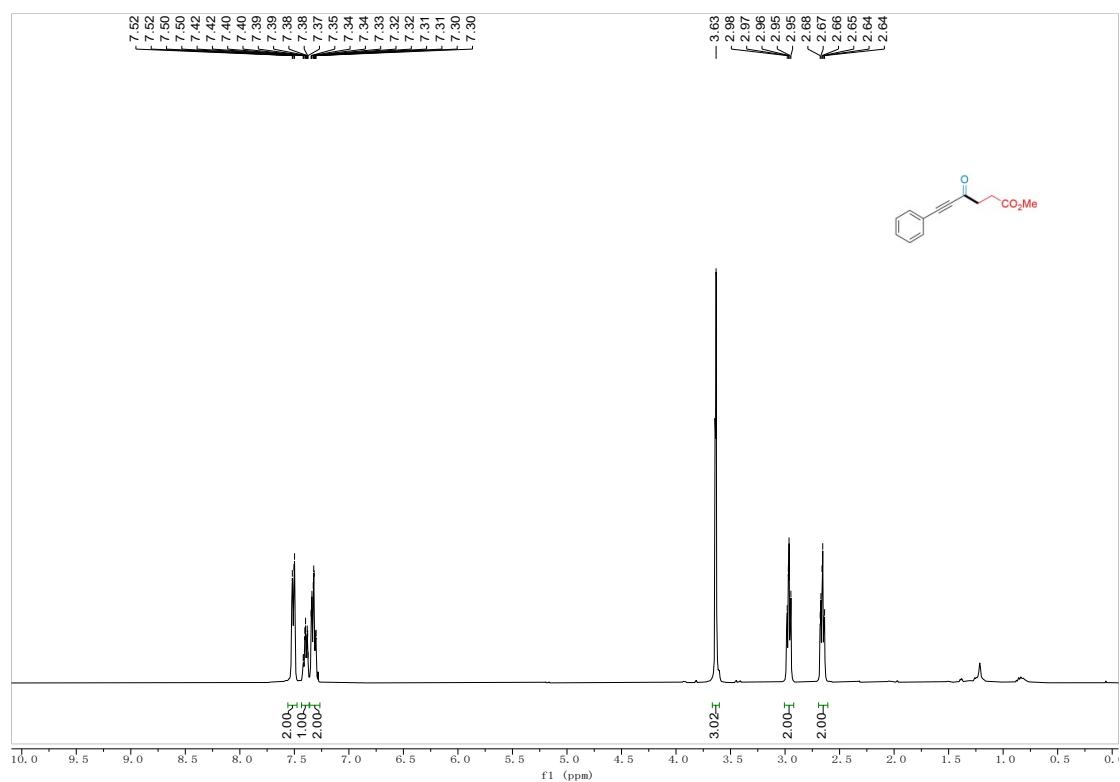

<sup>13</sup>C NMR (100 MHz, CDCl<sub>3</sub>) spectrum of compound 3a

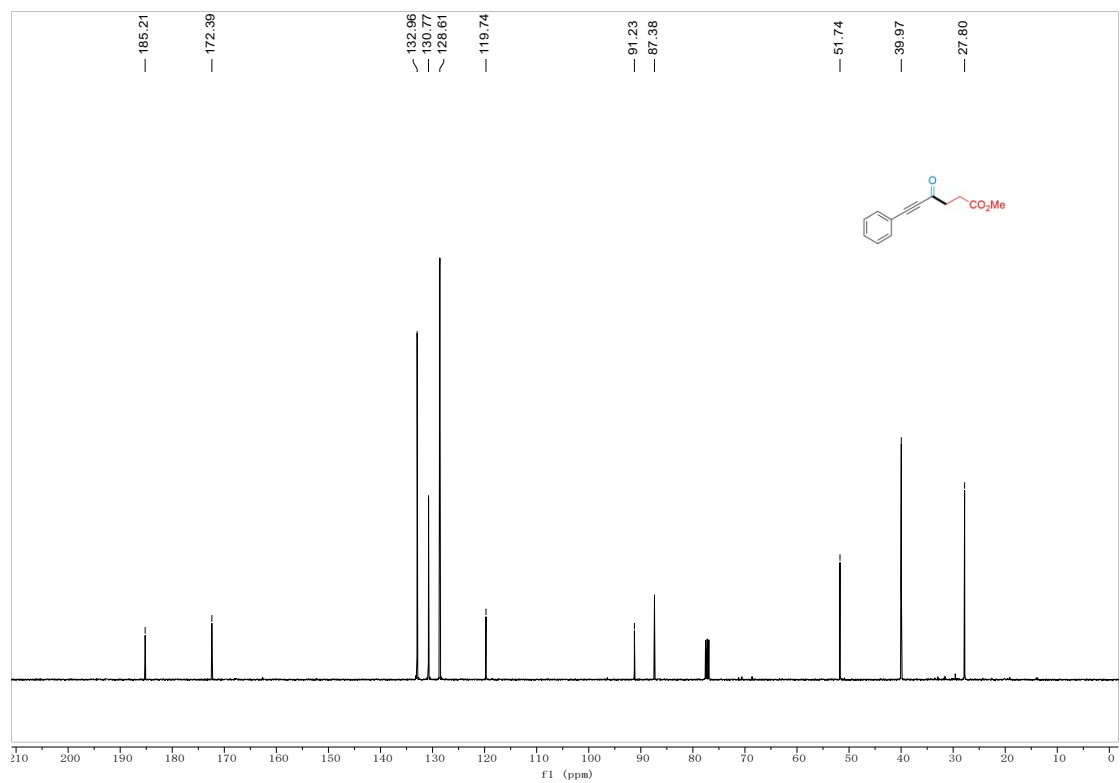

<sup>1</sup>H NMR (400 MHz, CDCl<sub>3</sub>) spectrum of compound 3b

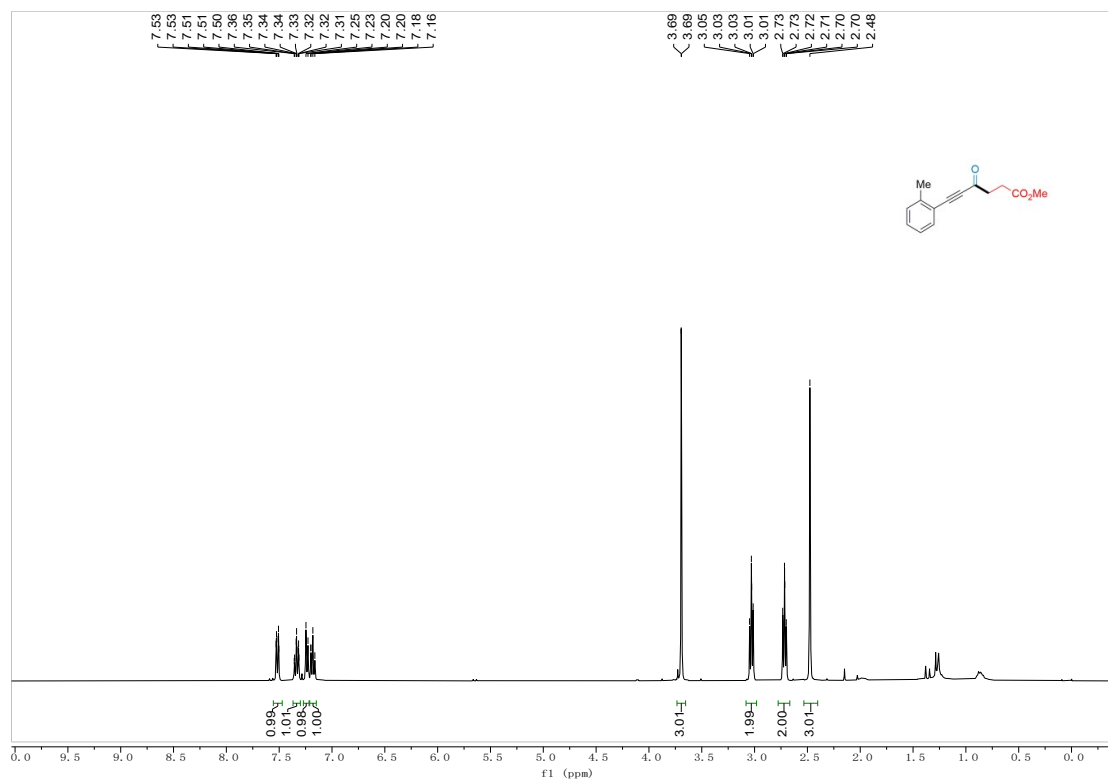

<sup>13</sup>C NMR (100 MHz, CDCl<sub>3</sub>) spectrum of compound **3b**

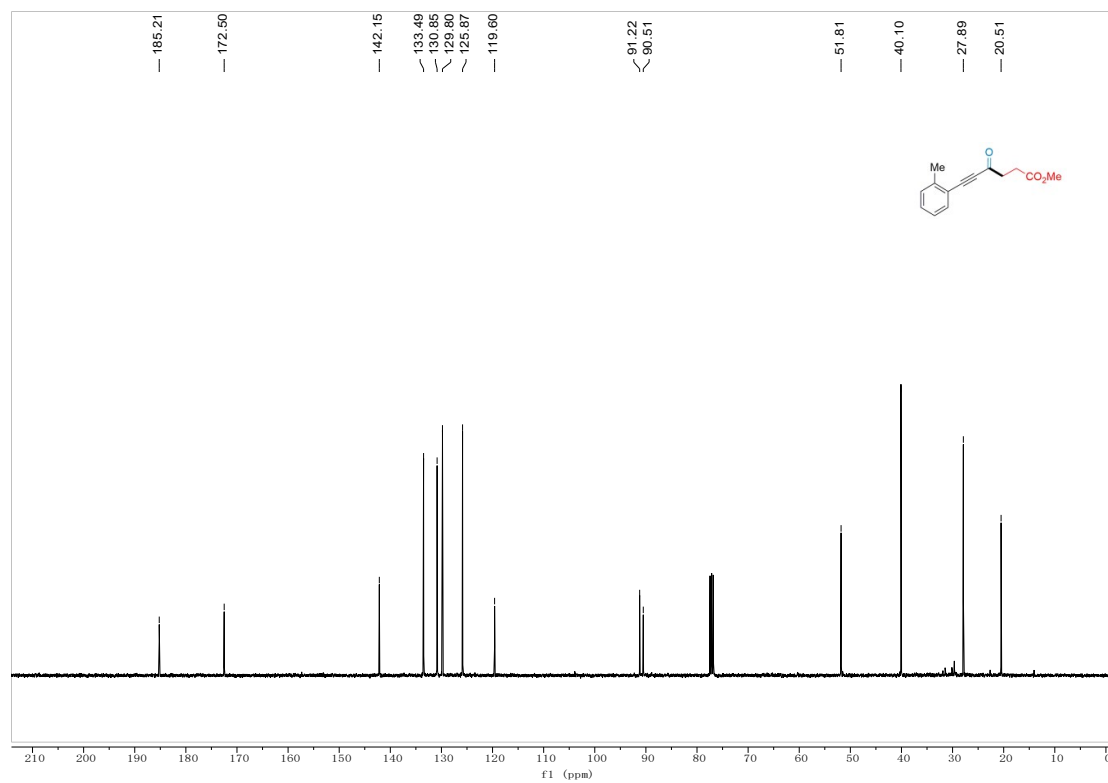

<sup>1</sup>H NMR (400 MHz, CDCl<sub>3</sub>) spectrum of compound **3c**

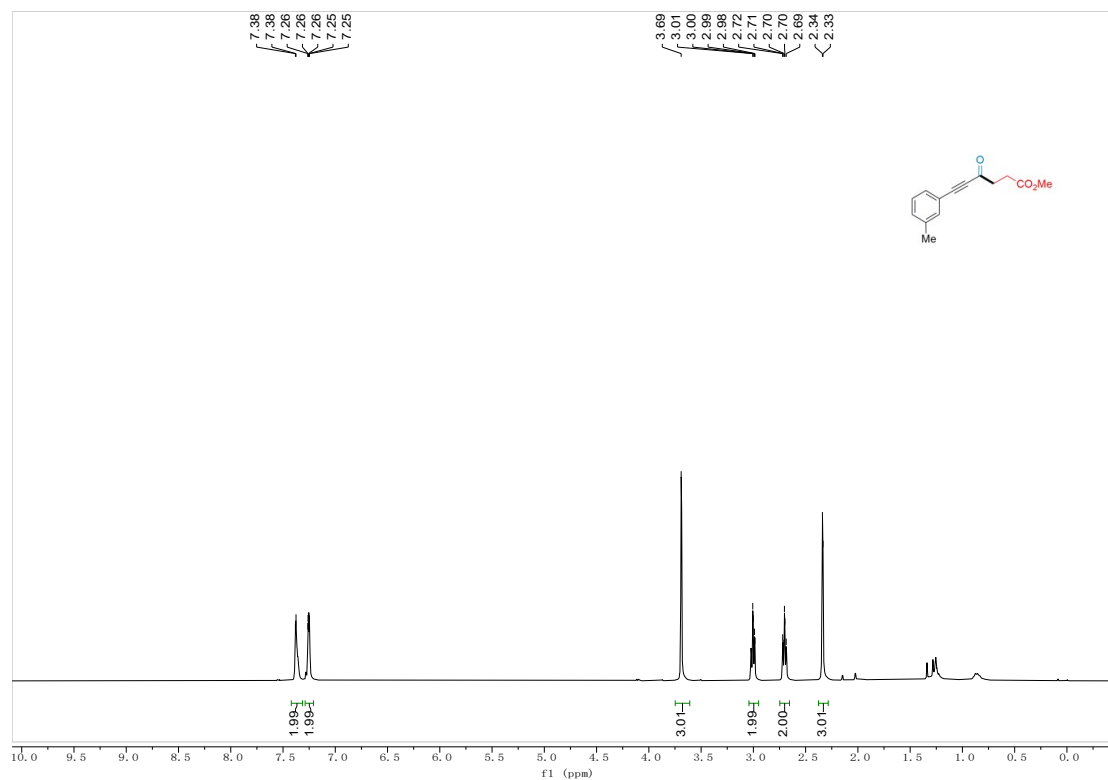

<sup>13</sup>C NMR (100 MHz, CDCl<sub>3</sub>) spectrum of compound 3c

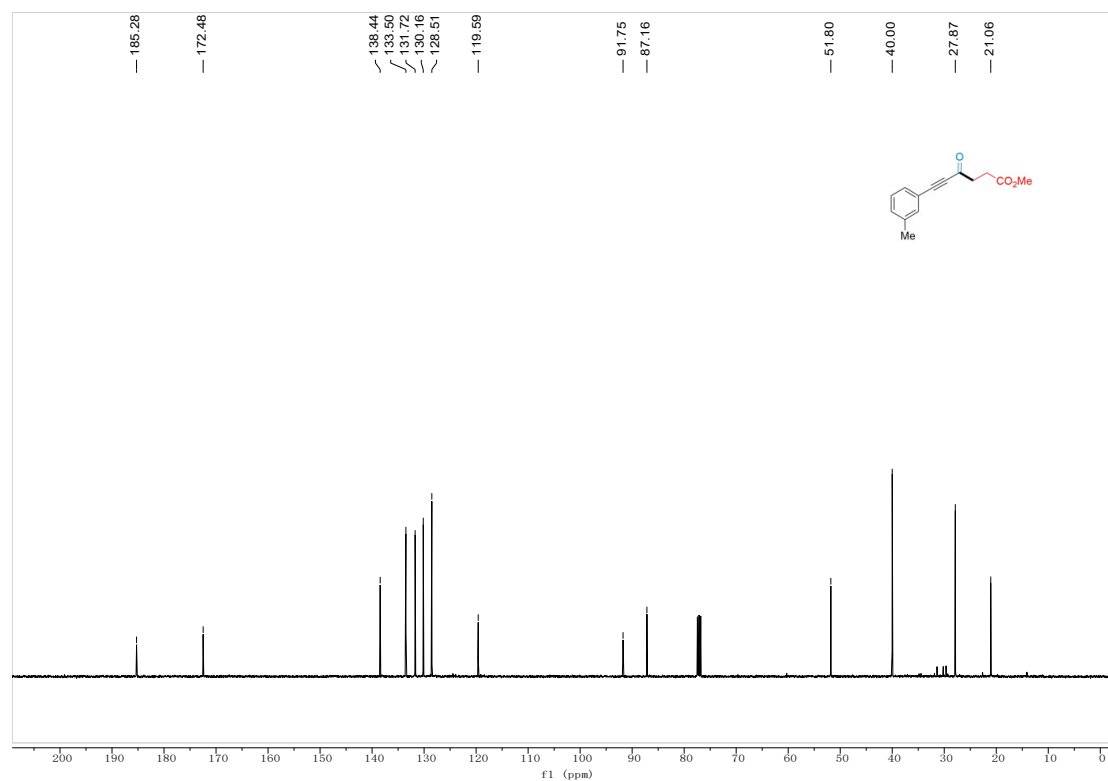

<sup>1</sup>H NMR (400 MHz, CDCl<sub>3</sub>) spectrum of compound 3d



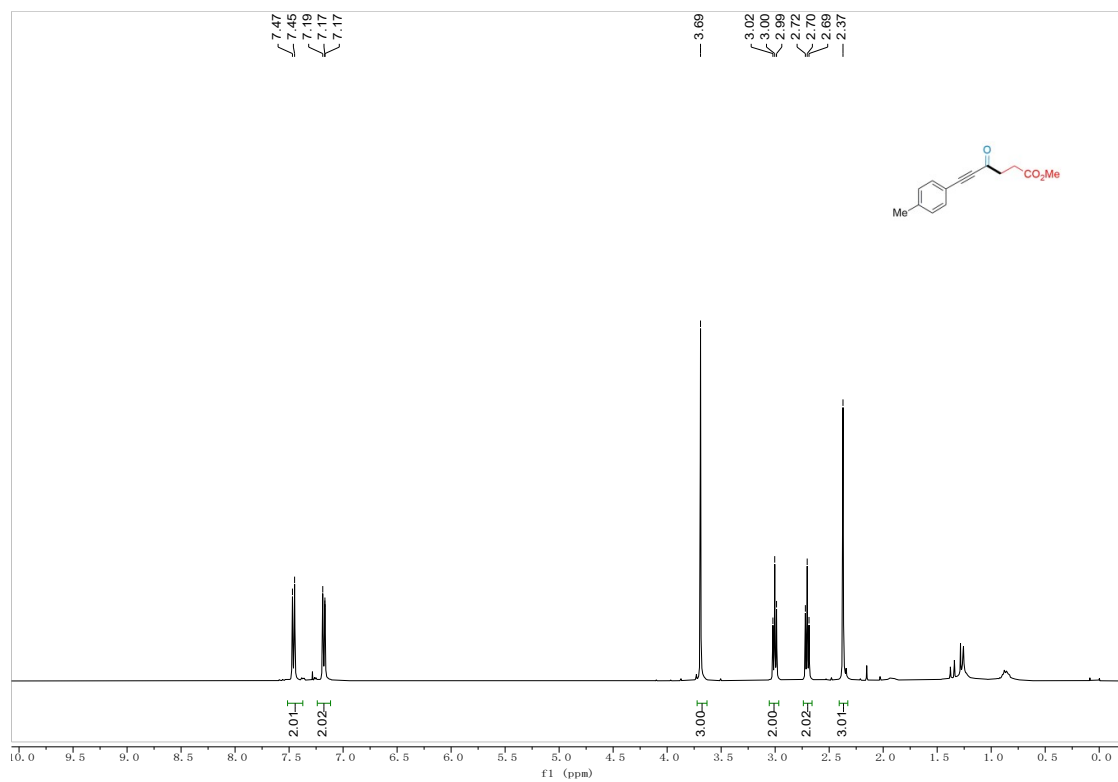

$^{13}\text{C}$  NMR (100 MHz,  $\text{CDCl}_3$ ) spectrum of compound 3d

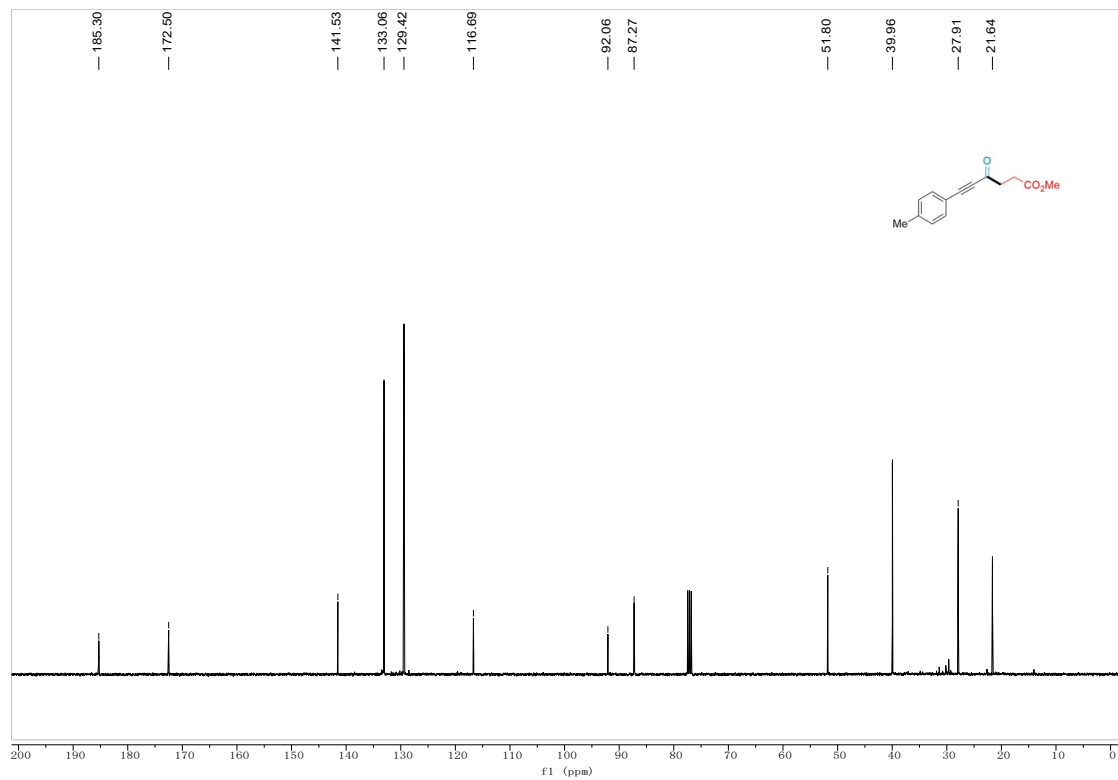

$^1\text{H}$  NMR (400 MHz,  $\text{CDCl}_3$ ) spectrum of compound 3e

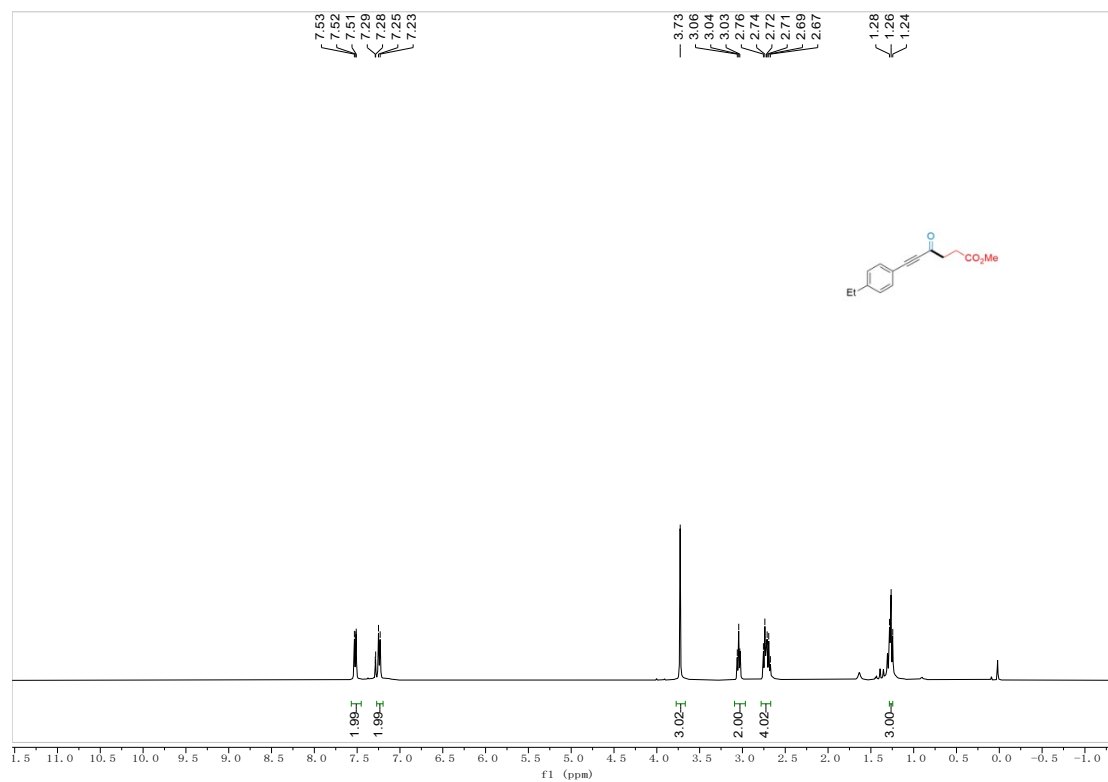

$^{13}\text{C}$  NMR (100 MHz,  $\text{CDCl}_3$ ) spectrum of compound **3e**

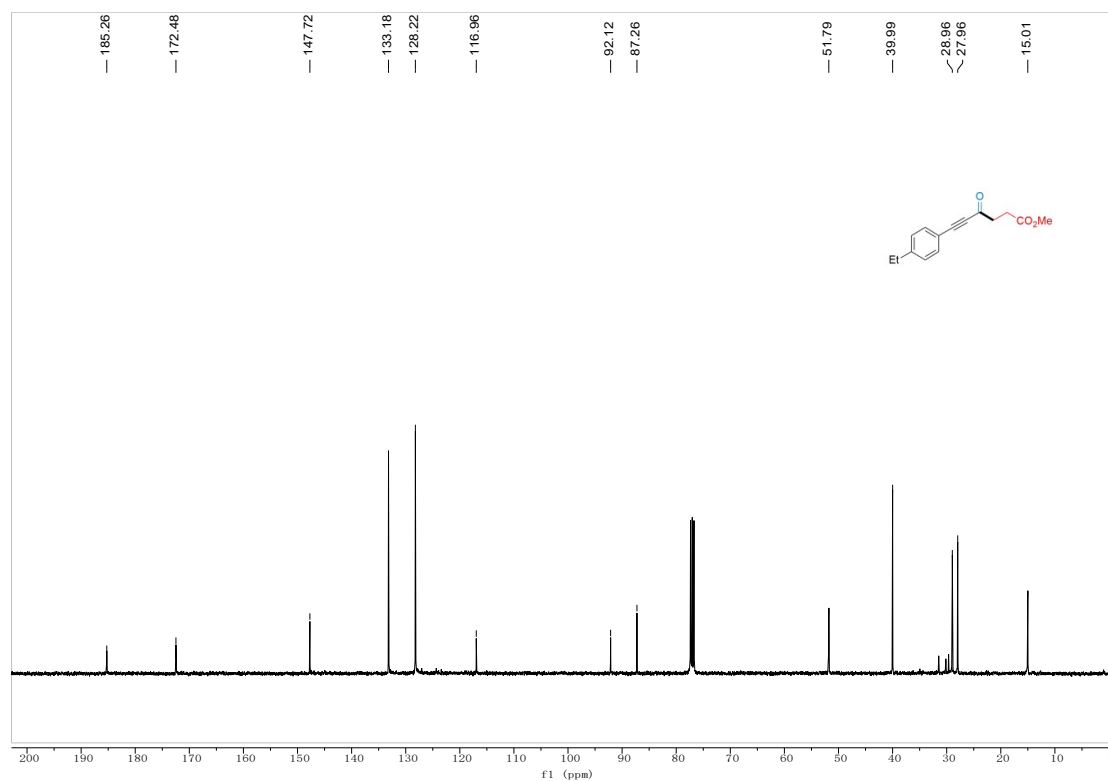

$^1\text{H}$  NMR (400 MHz,  $\text{CDCl}_3$ ) spectrum of compound **3f**

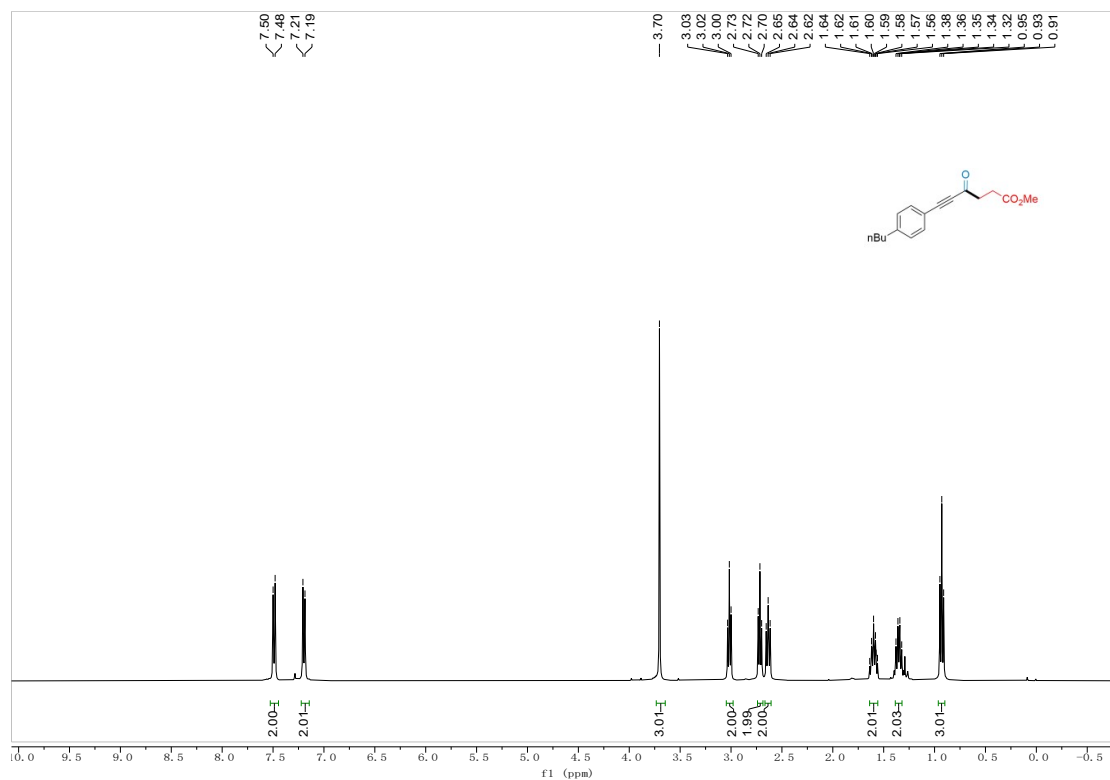

<sup>13</sup>C NMR (100 MHz, CDCl<sub>3</sub>) spectrum of compound **3f**

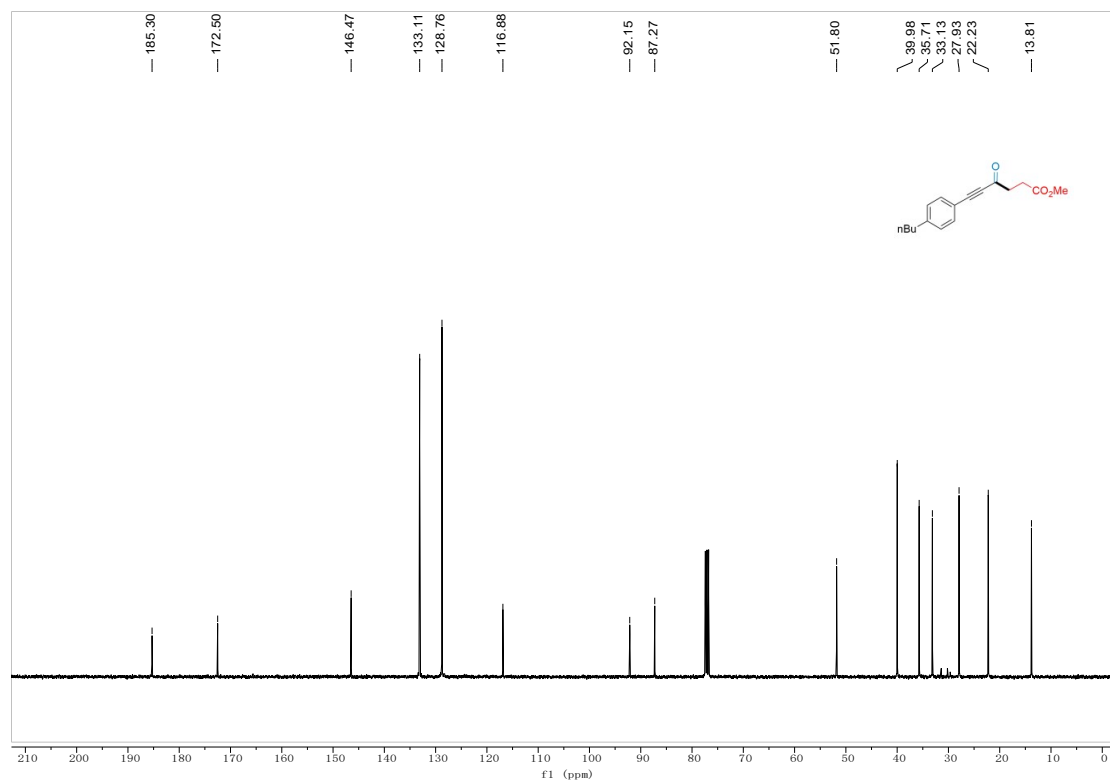

<sup>1</sup>H NMR (400 MHz, CDCl<sub>3</sub>) spectrum of compound **3g**

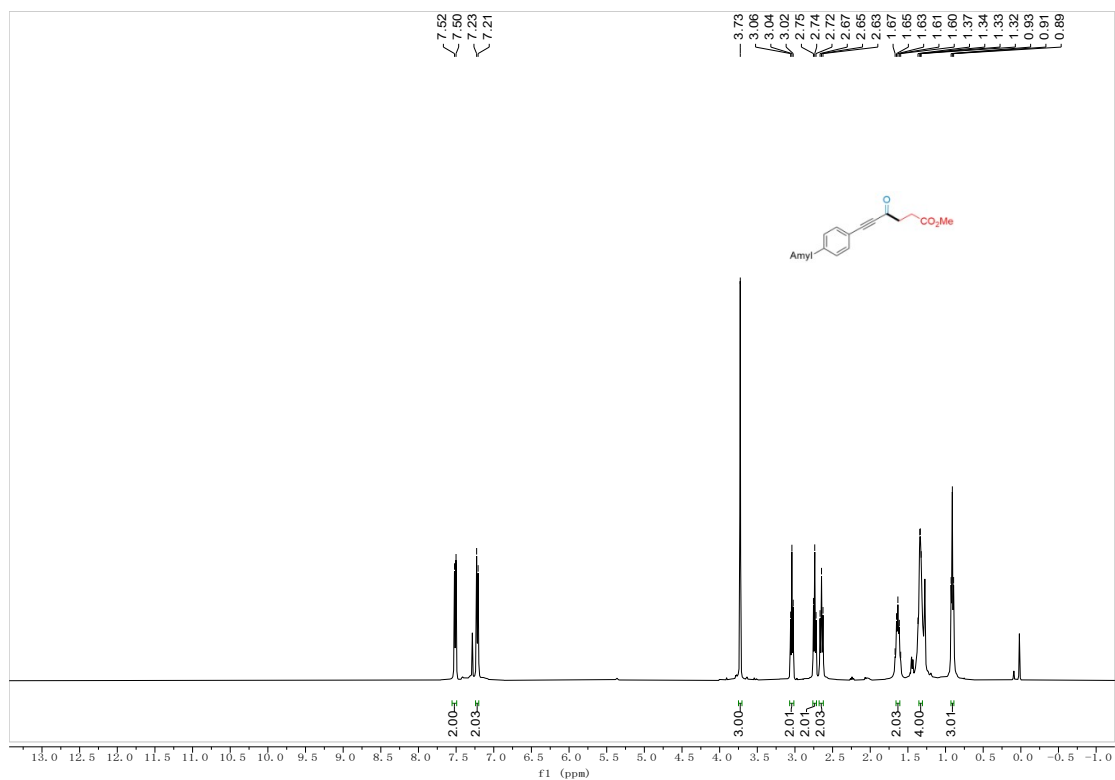

$^{13}\text{C}$  NMR (100 MHz,  $\text{CDCl}_3$ ) spectrum of compound **3g**

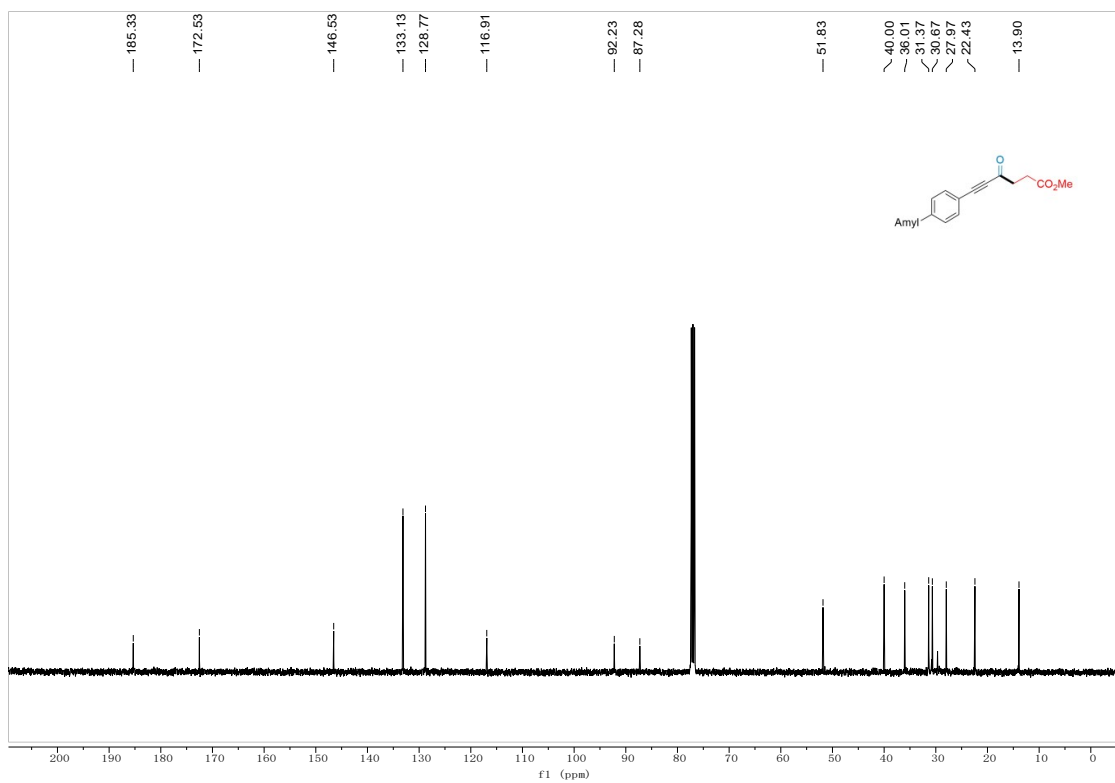

$^1\text{H}$  NMR (400 MHz,  $\text{CDCl}_3$ ) spectrum of compound **3h**

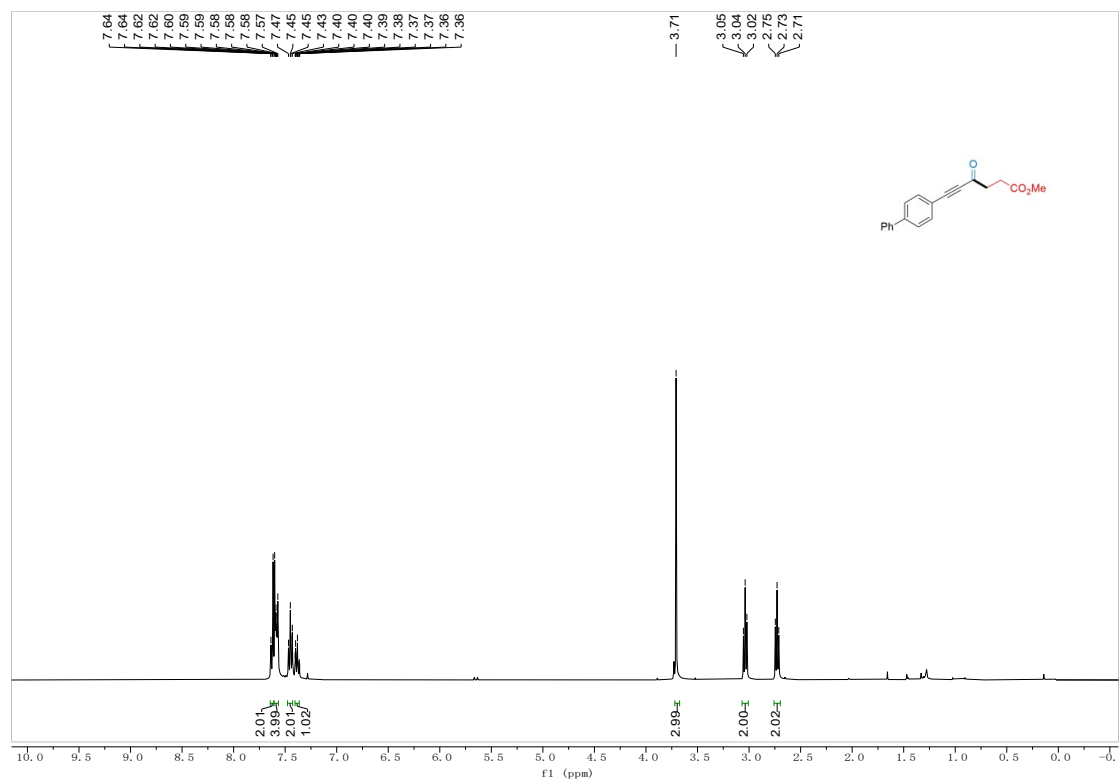

**<sup>13</sup>C NMR (100 MHz, CDCl<sub>3</sub>) spectrum of compound 3h**

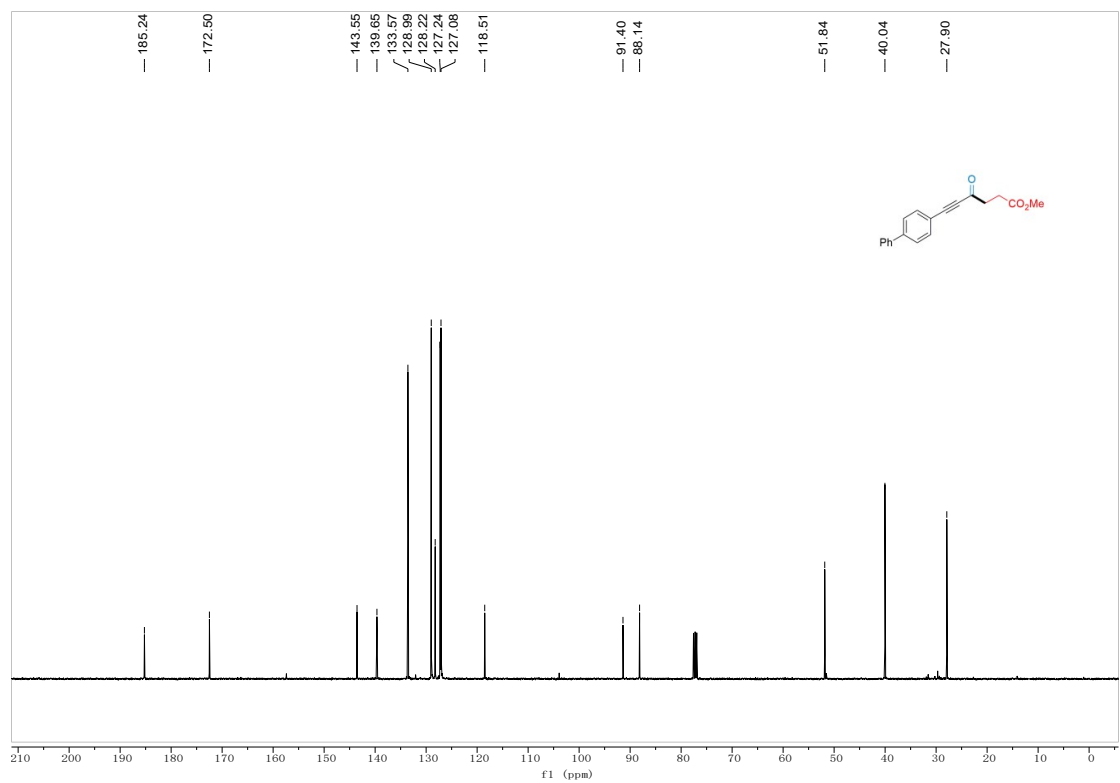

**<sup>1</sup>H NMR (400 MHz, CDCl<sub>3</sub>) spectrum of compound 3i**

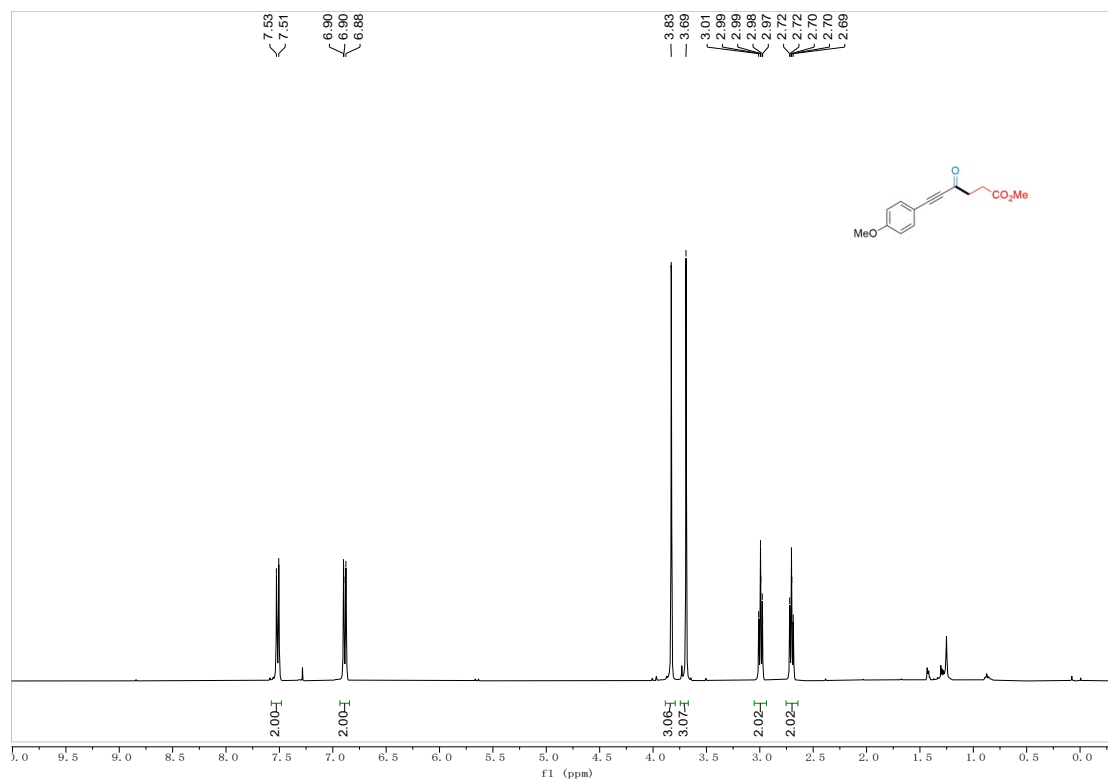

**<sup>13</sup>C NMR (100 MHz, CDCl<sub>3</sub>) spectrum of compound **3i****

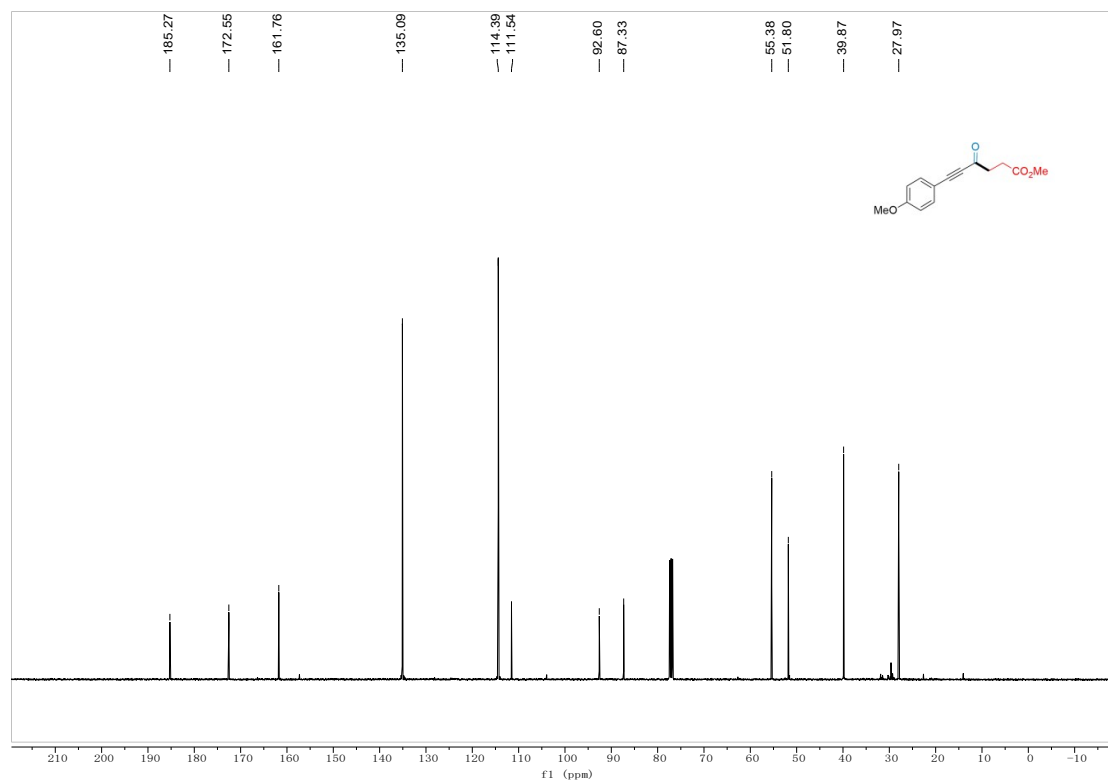

**<sup>1</sup>H NMR (400 MHz, CDCl<sub>3</sub>) spectrum of compound **3j****

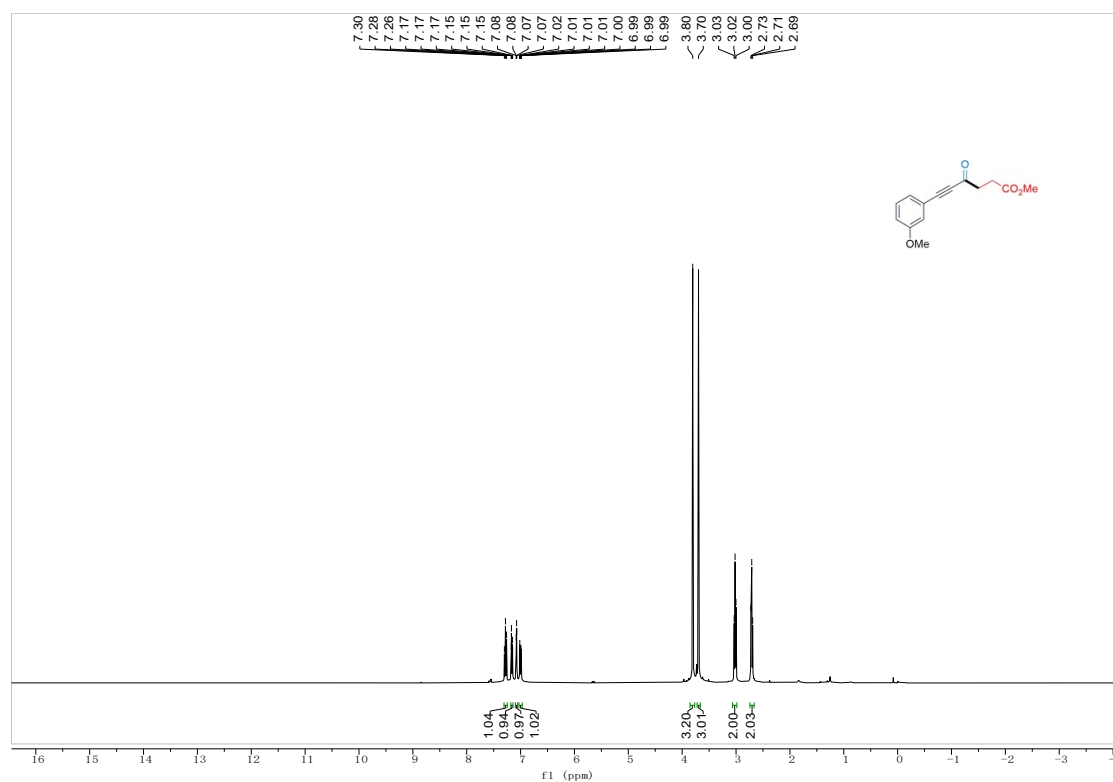

$^{13}\text{C}$  NMR (100 MHz,  $\text{CDCl}_3$ ) spectrum of compound **3j**

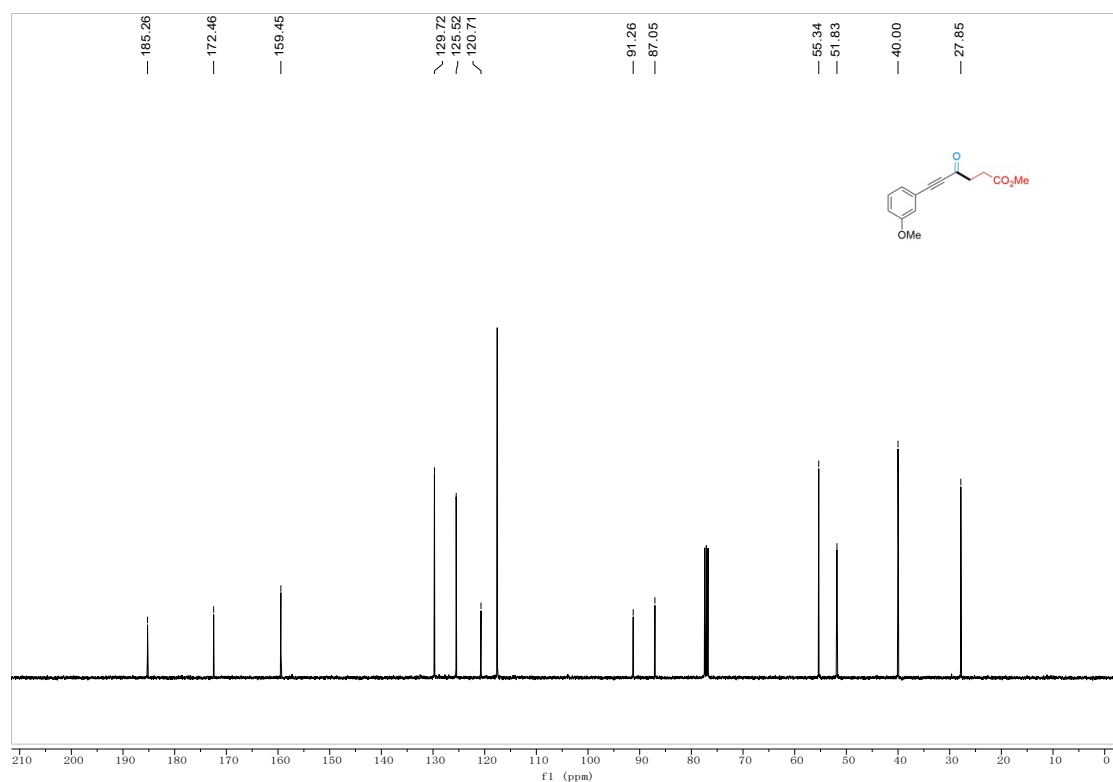

$^1\text{H}$  NMR (400 MHz,  $\text{CDCl}_3$ ) spectrum of compound **3k**

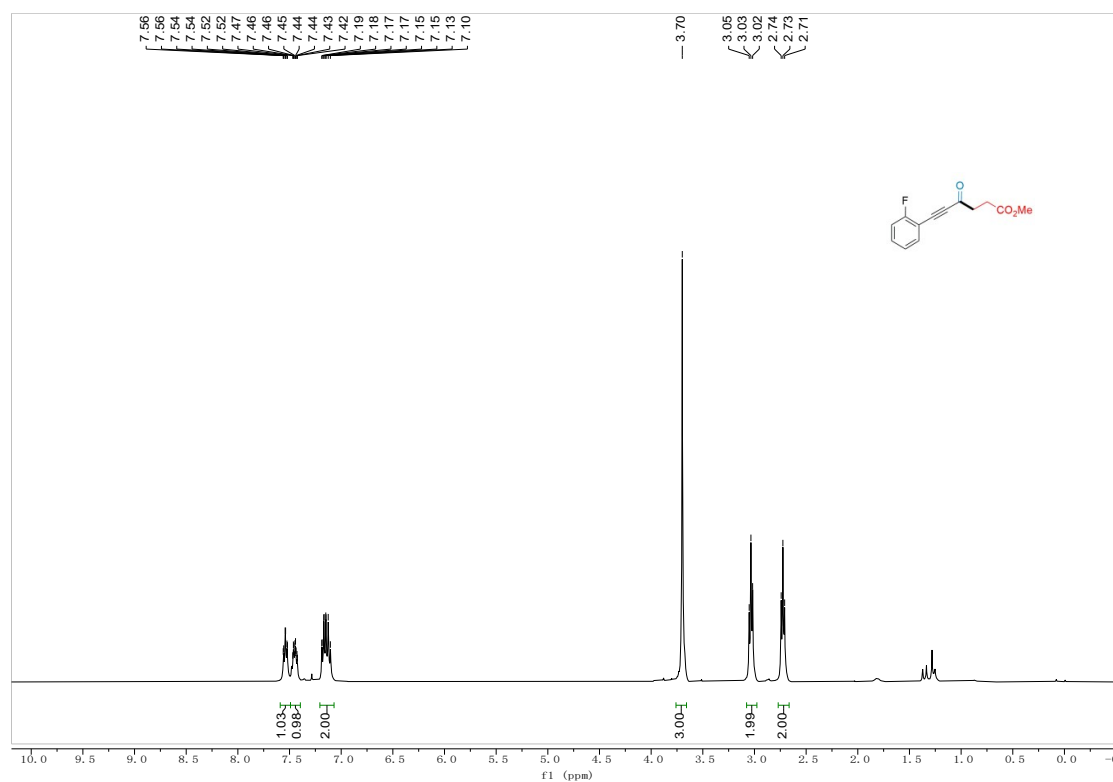

<sup>13</sup>C NMR (100 MHz, CDCl<sub>3</sub>) spectrum of compound **3k**

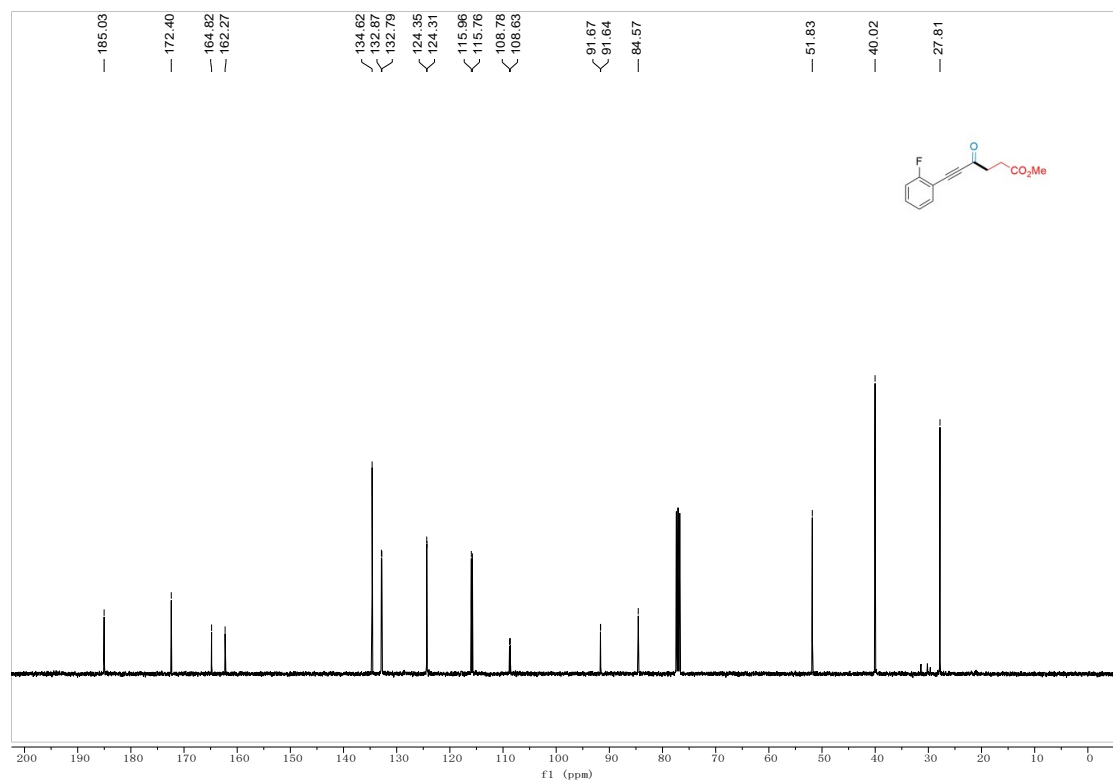

<sup>19</sup>F NMR (376 MHz, CDCl<sub>3</sub>) spectrum of compound **3k**



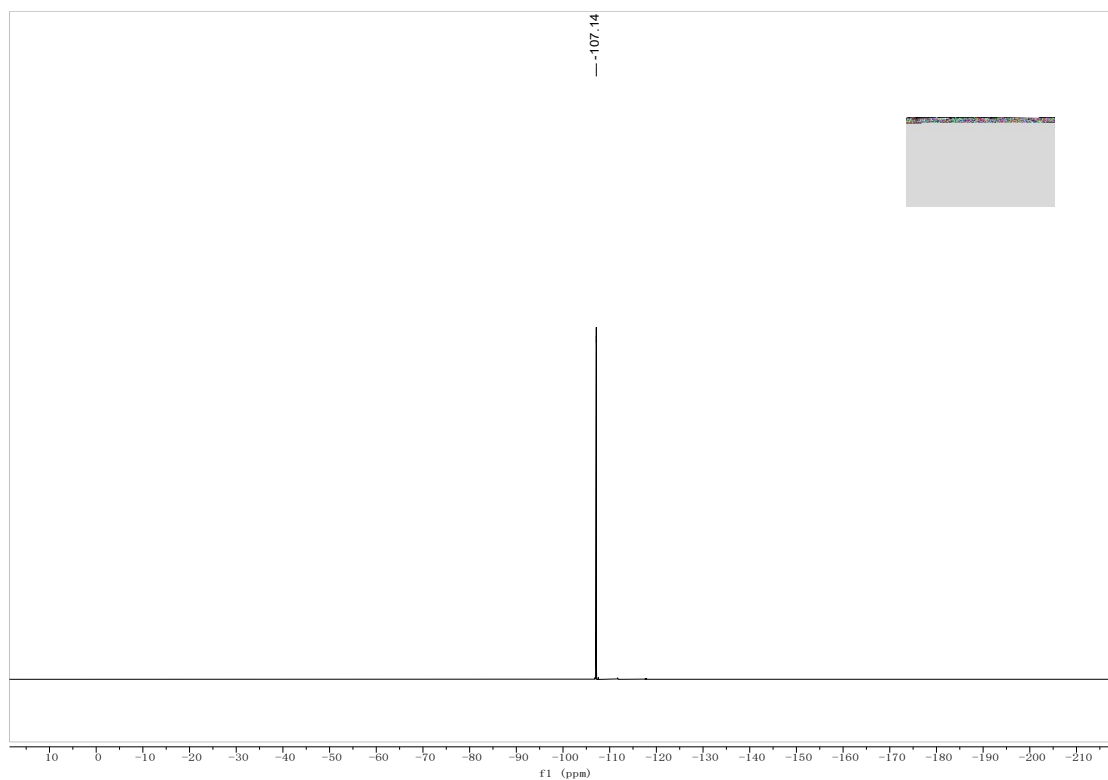

<sup>1</sup>H NMR (400 MHz, CDCl<sub>3</sub>) spectrum of compound **31**

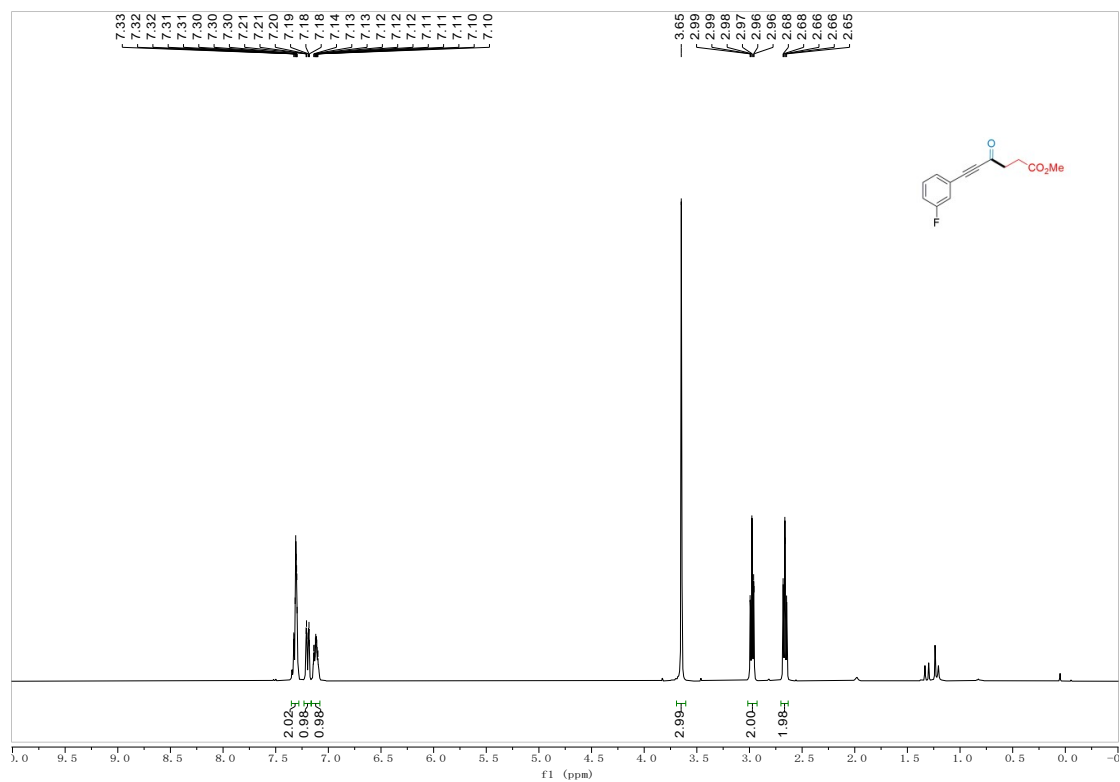

<sup>13</sup>C NMR (100 MHz, CDCl<sub>3</sub>) spectrum of compound **31**

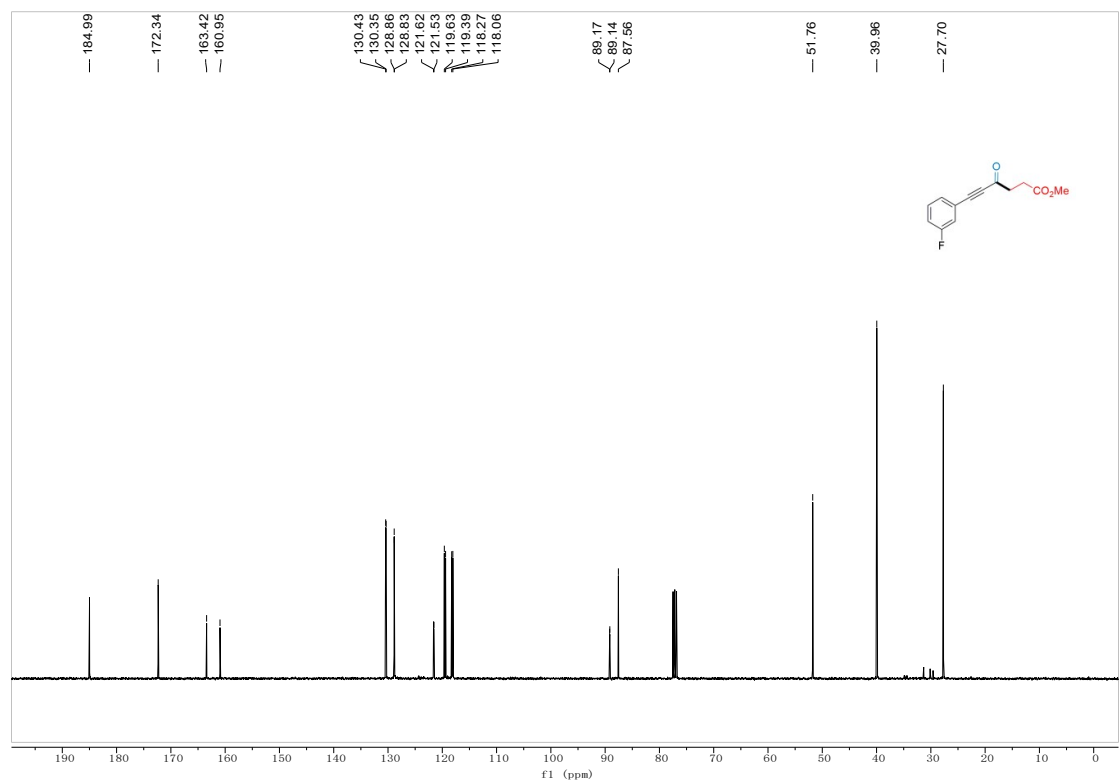

$^{19}\text{F}$  NMR (376 MHz,  $\text{CDCl}_3$ ) spectrum of compound **31**

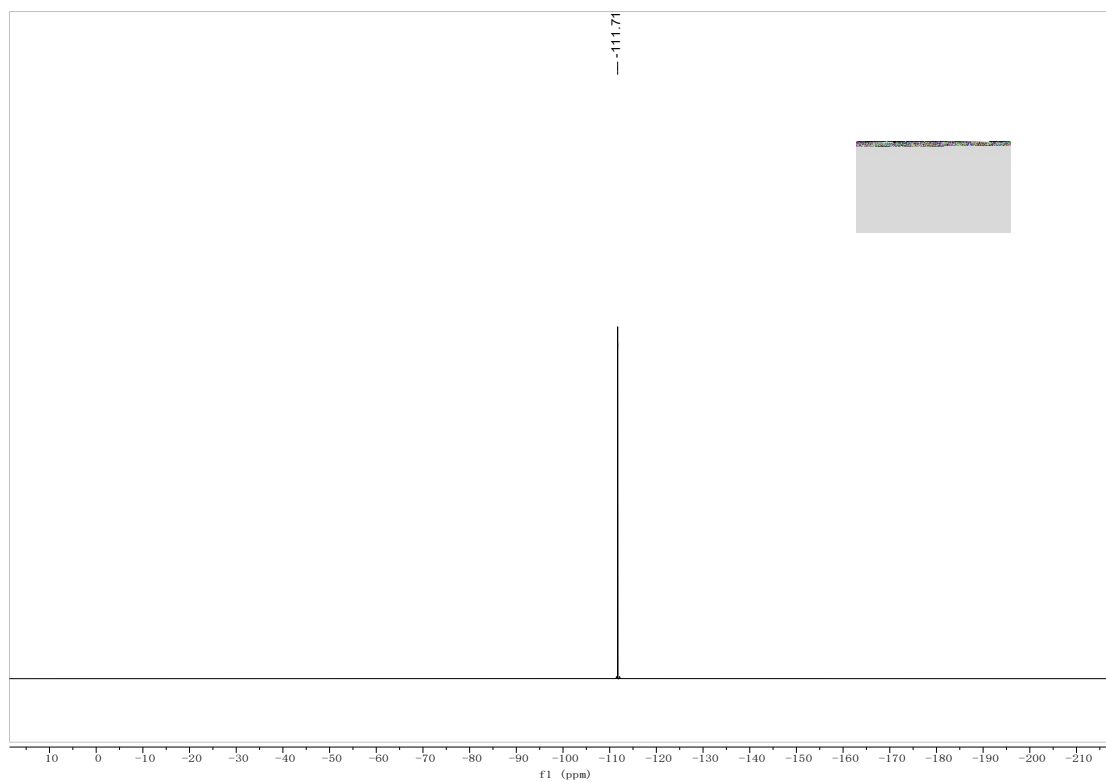

<sup>1</sup>H NMR (400 MHz, CDCl<sub>3</sub>) spectrum of compound **3m**

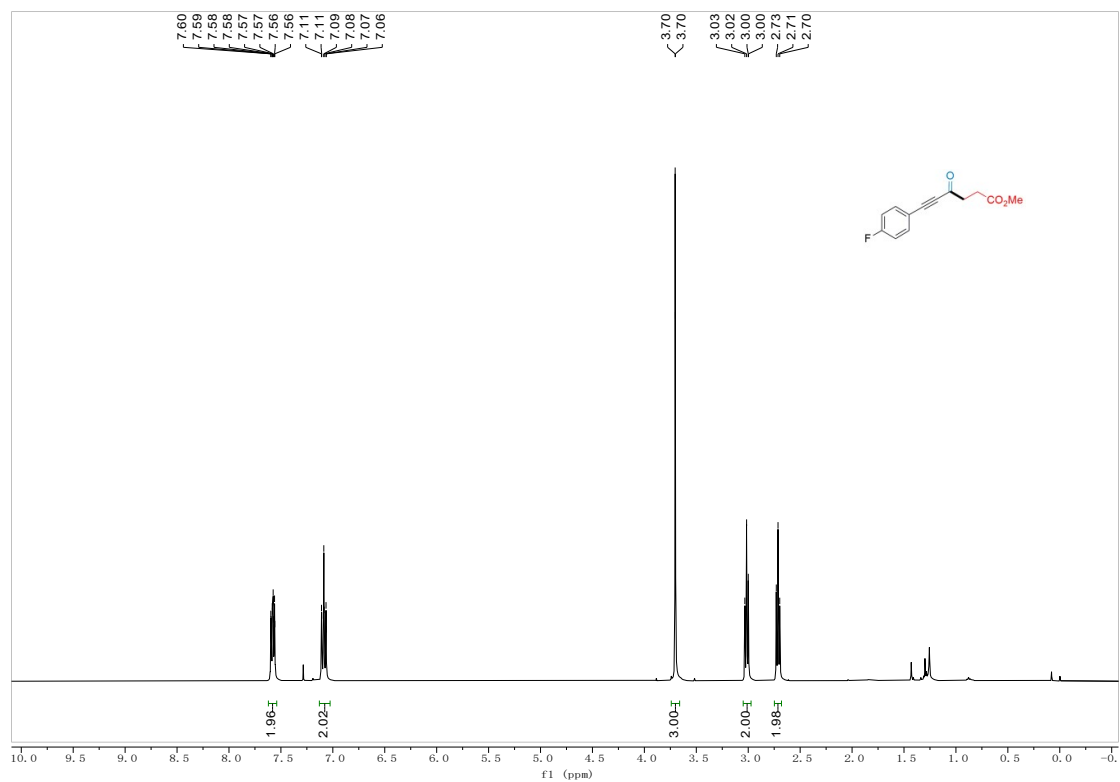

<sup>13</sup>C NMR (100 MHz, CDCl<sub>3</sub>) spectrum of compound **3m**

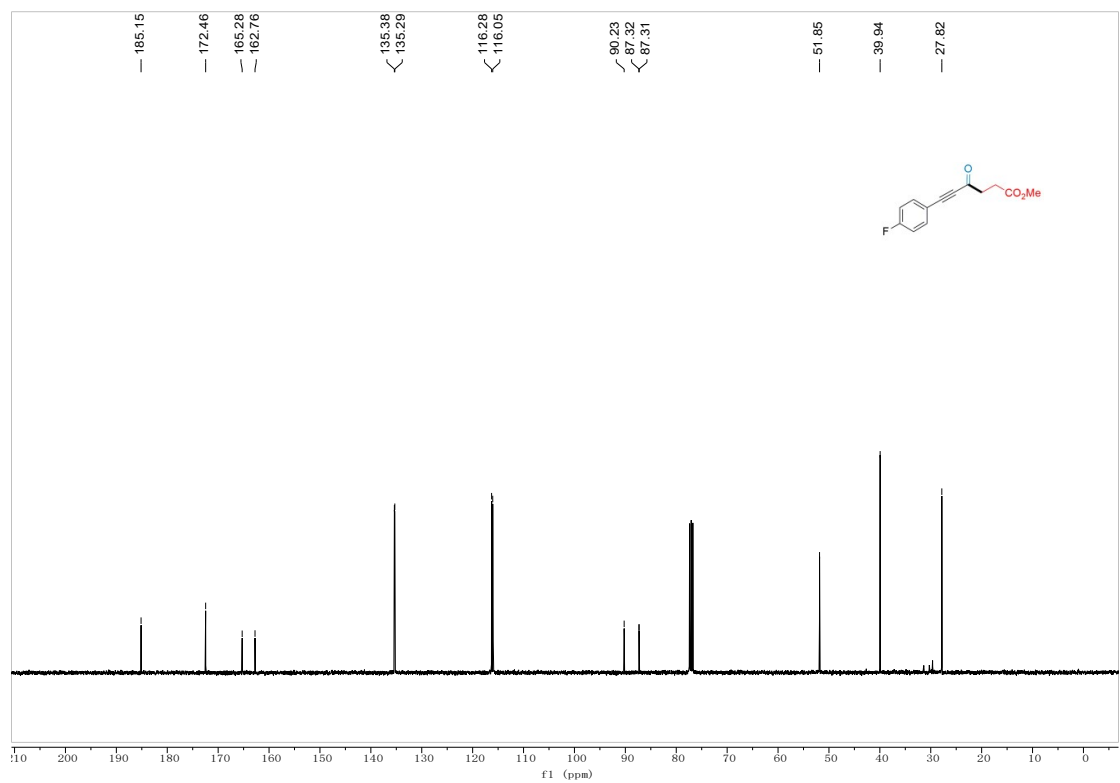

$^{19}\text{F}$  NMR (376 MHz,  $\text{CDCl}_3$ ) spectrum of compound **3m**

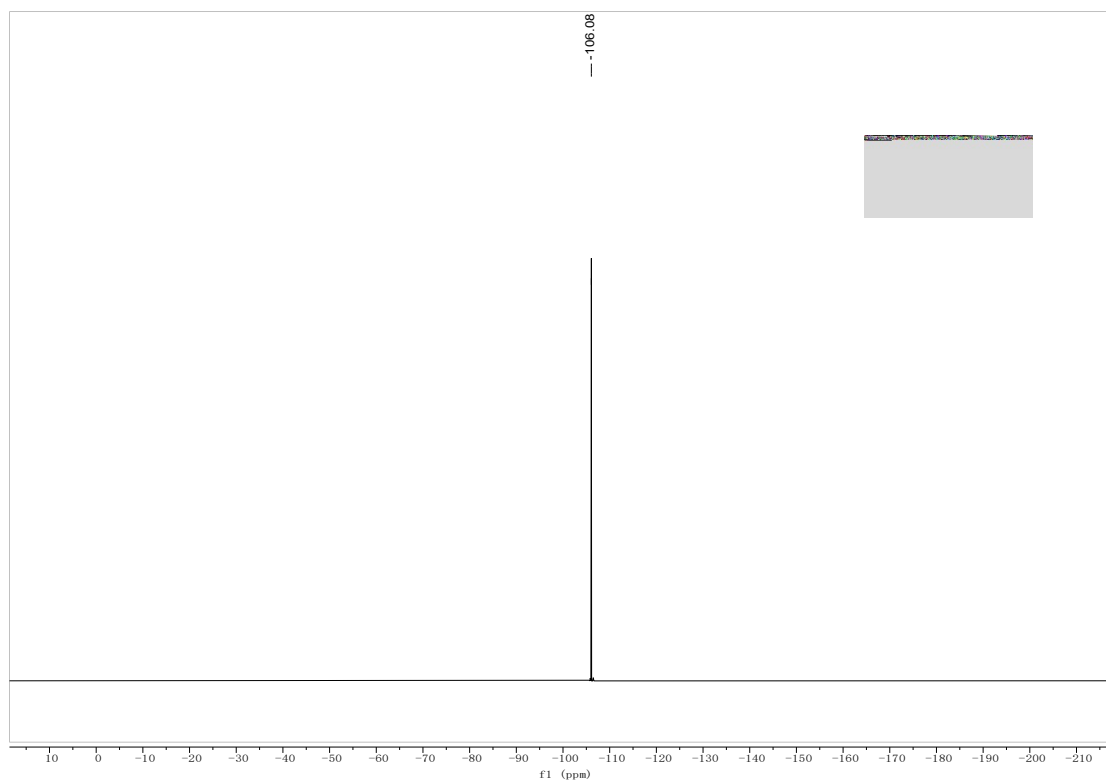

<sup>1</sup>H NMR (400 MHz, CDCl<sub>3</sub>) spectrum of compound **3n**

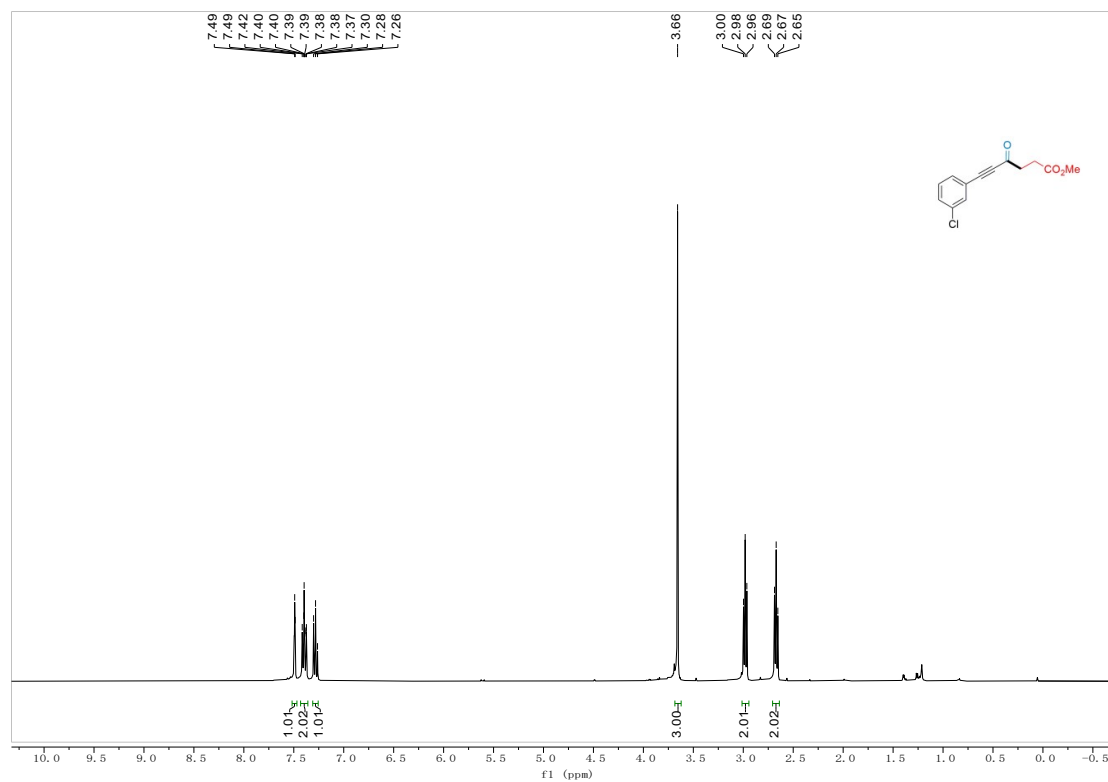

<sup>13</sup>C NMR (100 MHz, CDCl<sub>3</sub>) spectrum of compound **3n**

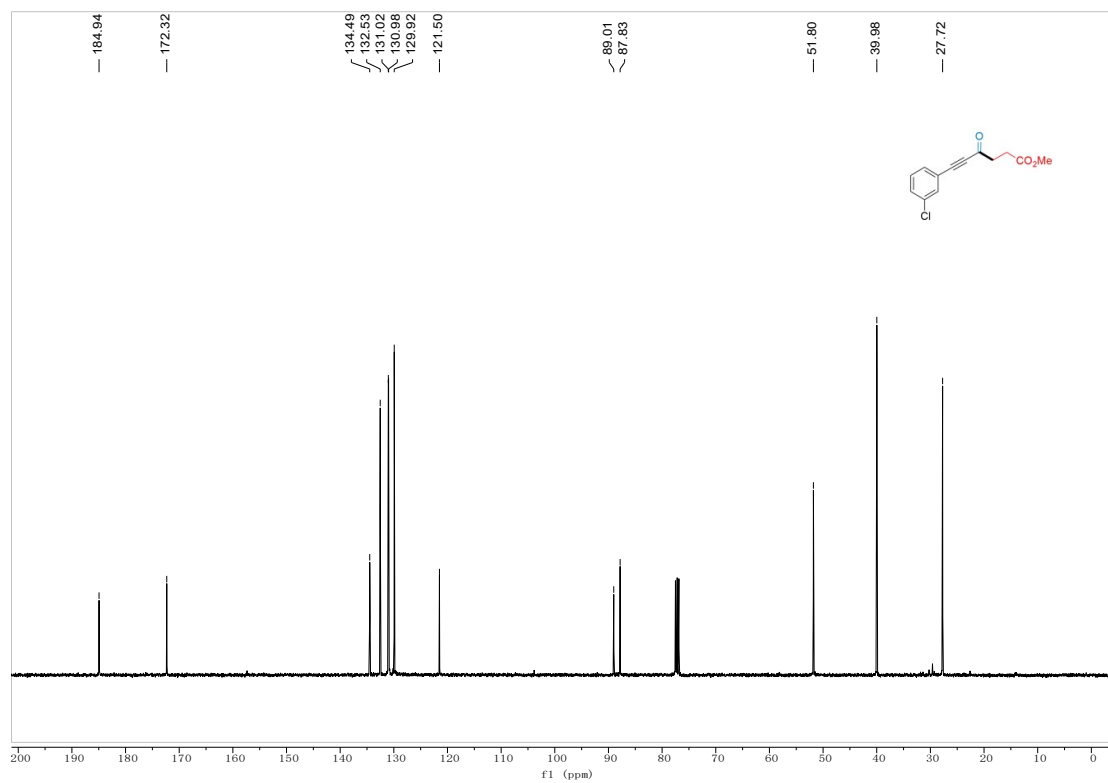

$^1\text{H}$  NMR (400 MHz,  $\text{CDCl}_3$ ) spectrum of compound **3o**

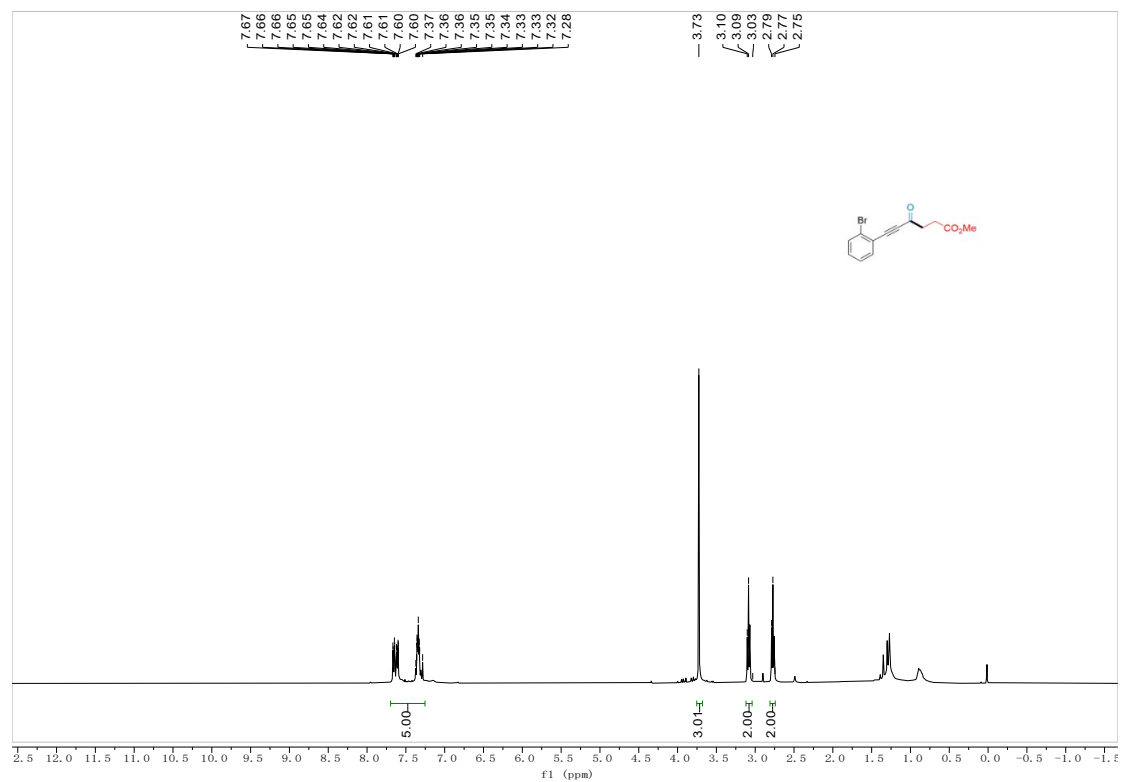

$^{13}\text{C}$  NMR (100 MHz,  $\text{CDCl}_3$ ) spectrum of compound **3o**

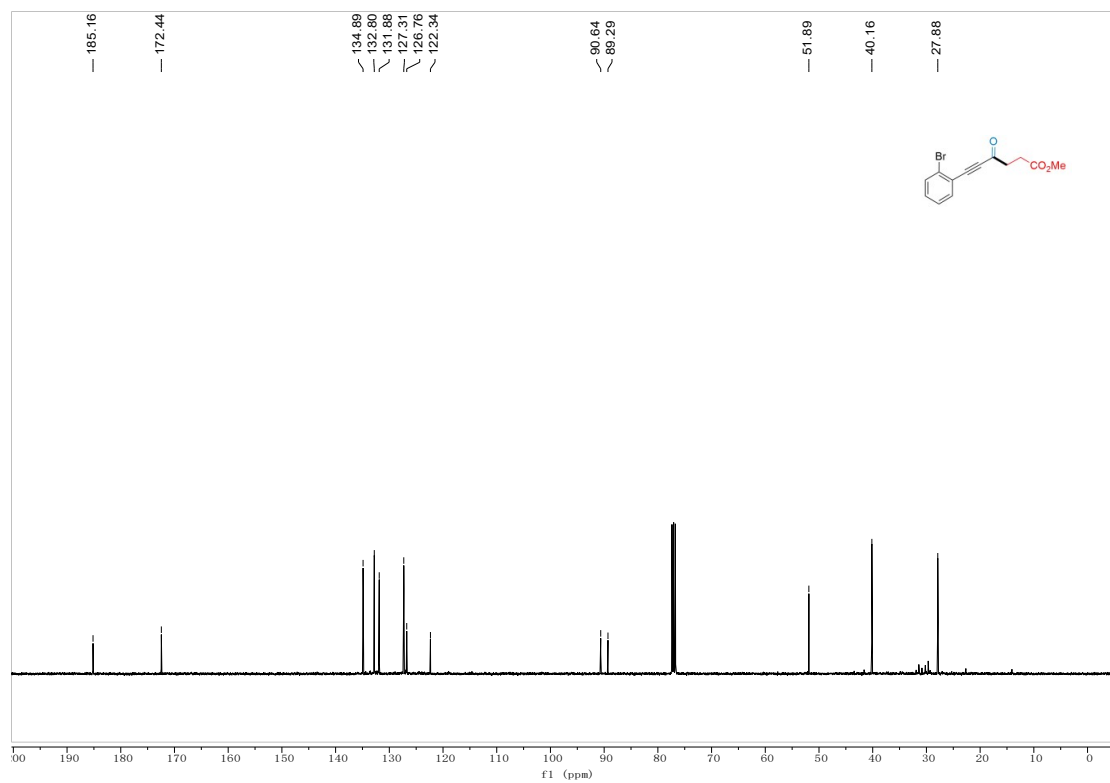

$^1\text{H}$  NMR (400 MHz,  $\text{CDCl}_3$ ) spectrum of compound **3p**

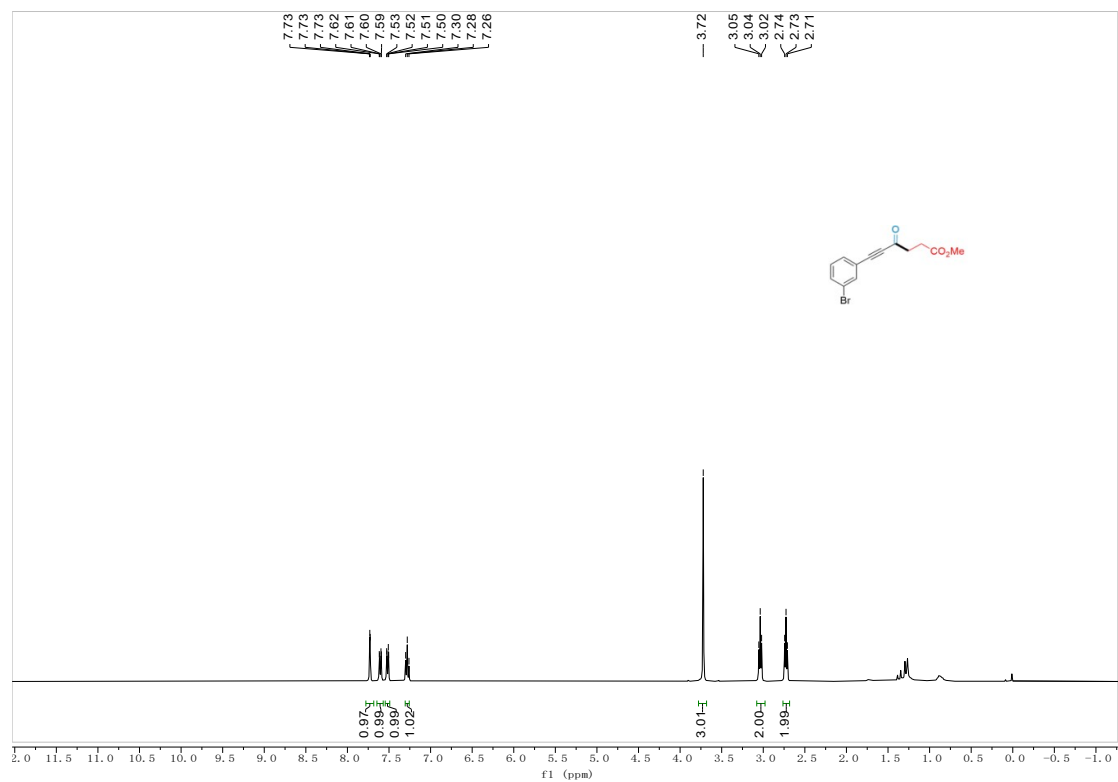

$^{13}\text{C}$  NMR (100 MHz,  $\text{CDCl}_3$ ) spectrum of compound **3p**

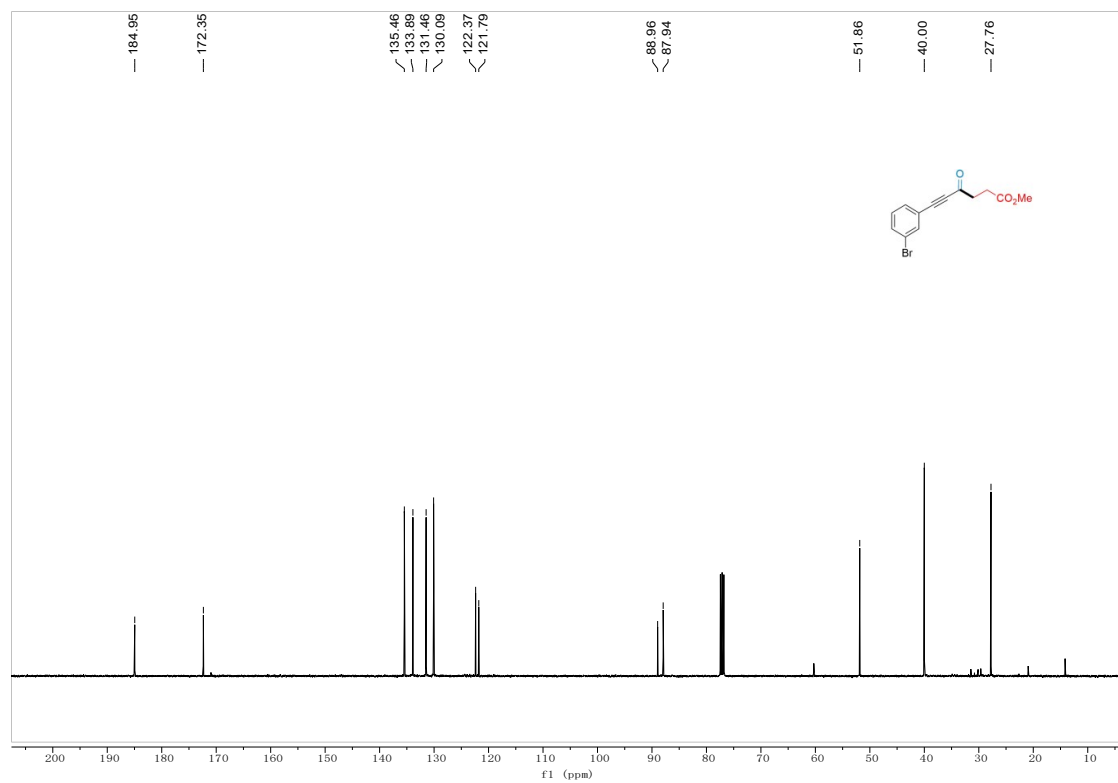



<sup>1</sup>H NMR (400 MHz, CDCl<sub>3</sub>) spectrum of compound **3q**

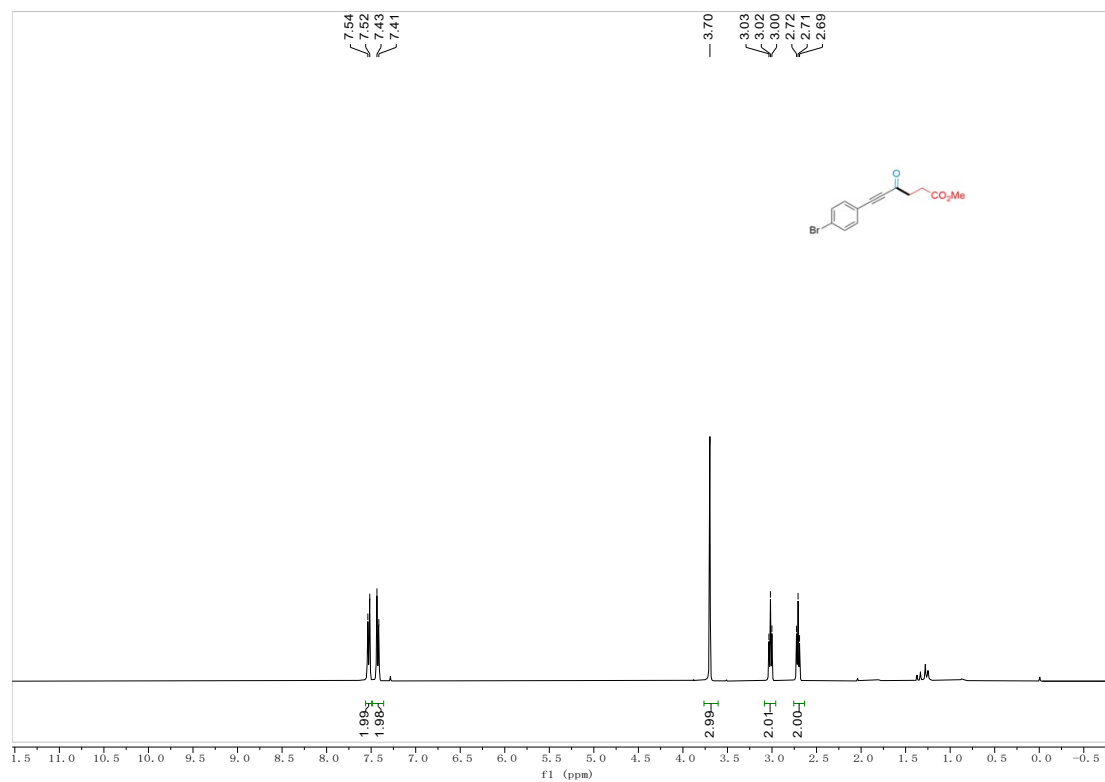

<sup>13</sup>C NMR (100 MHz, CDCl<sub>3</sub>) spectrum of compound **3q**

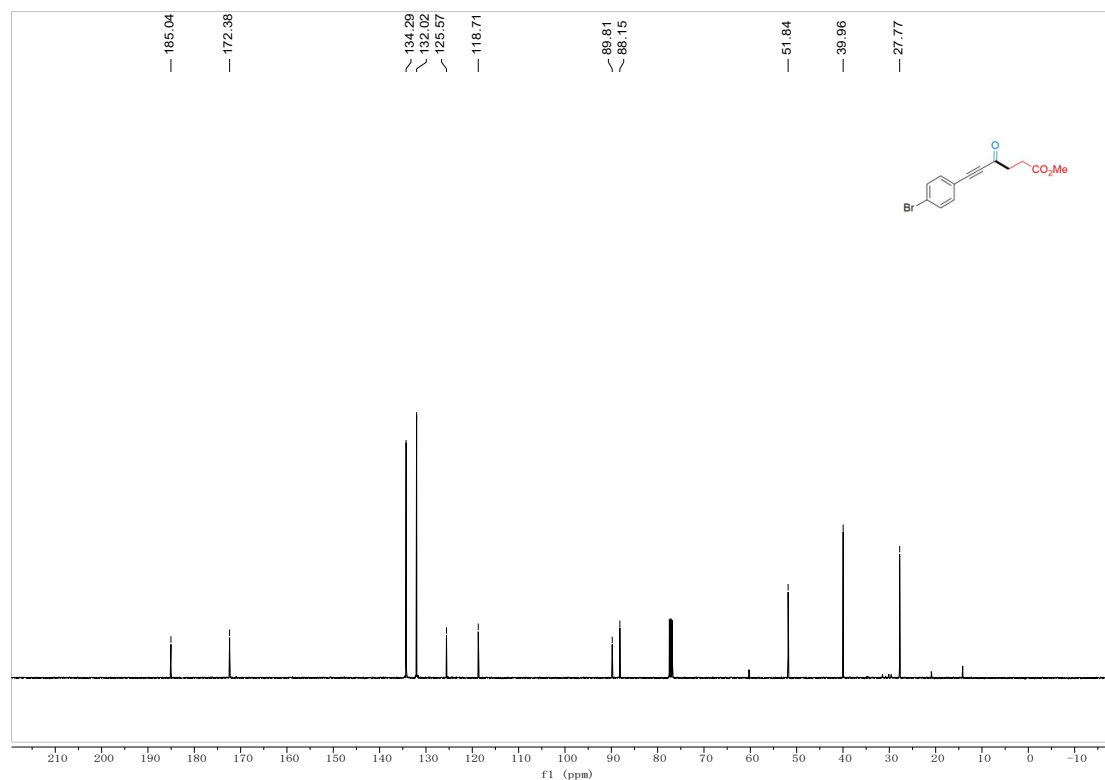

$^1\text{H}$  NMR (400 MHz,  $\text{CDCl}_3$ ) spectrum of compound **3s**

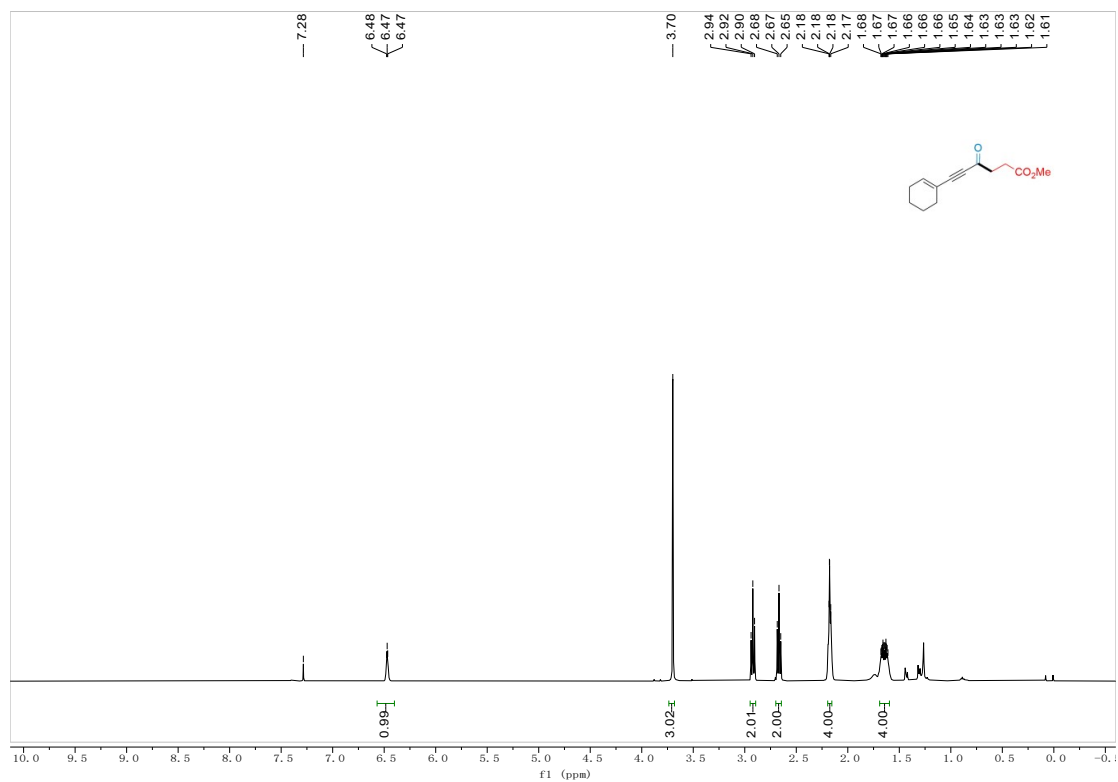

$^{13}\text{C}$  NMR (100 MHz,  $\text{CDCl}_3$ ) spectrum of compound **3s**

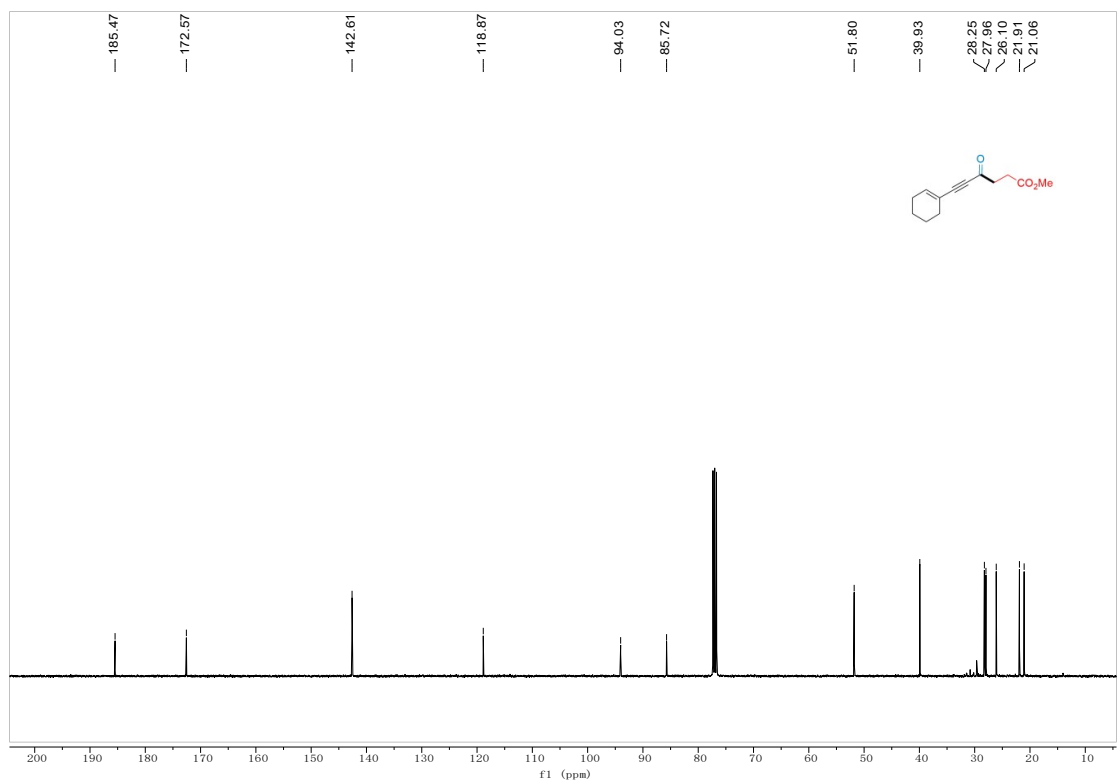

<sup>1</sup>H NMR (400 MHz, CDCl<sub>3</sub>) spectrum of compound **3t**

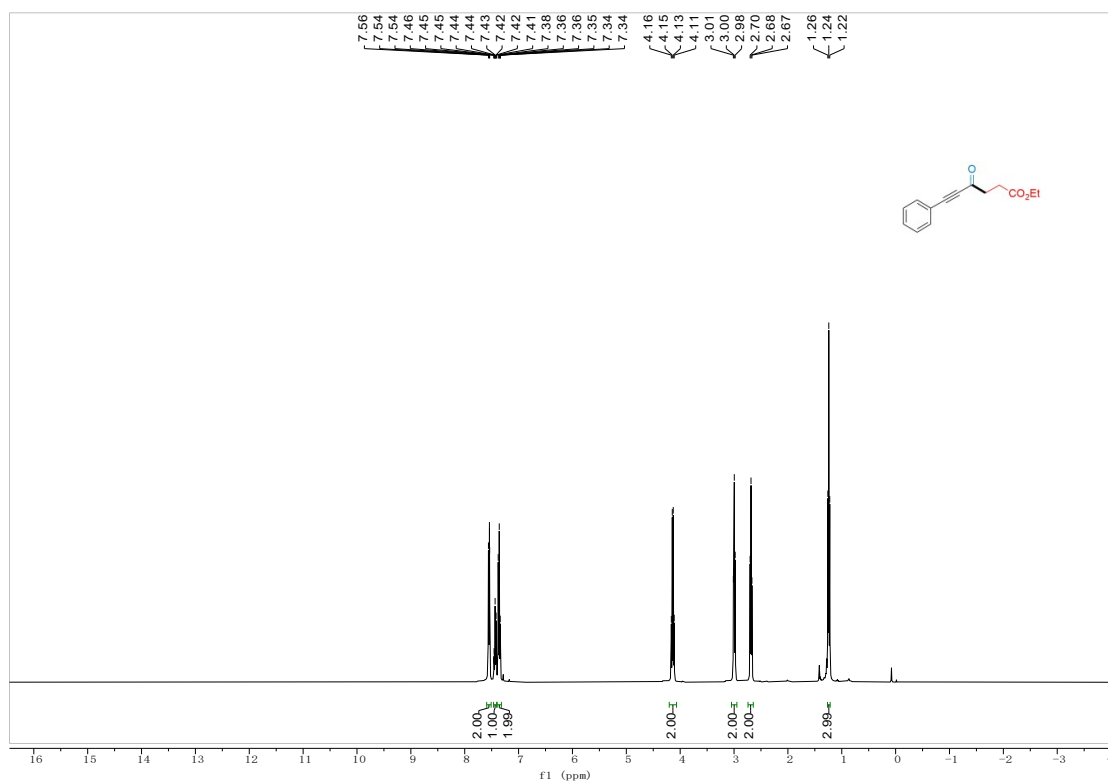

<sup>13</sup>C NMR (100 MHz, CDCl<sub>3</sub>) spectrum of compound **3t**

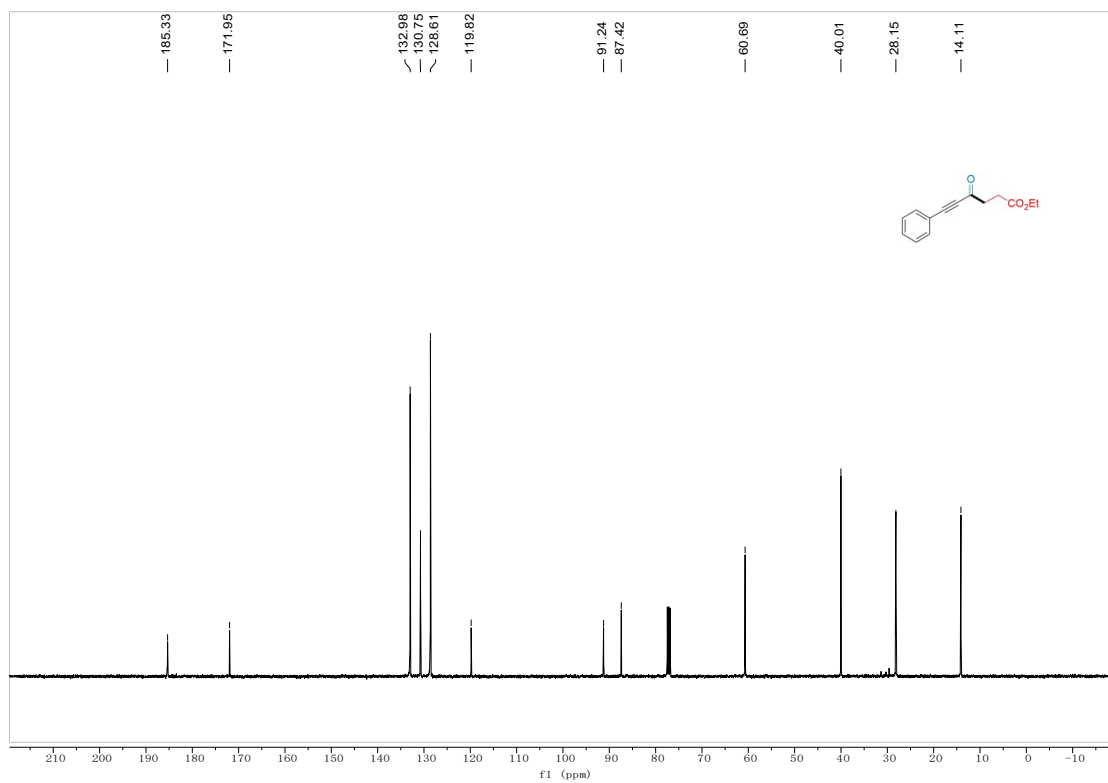

<sup>1</sup>H NMR (400 MHz, CDCl<sub>3</sub>) spectrum of compound **3u**

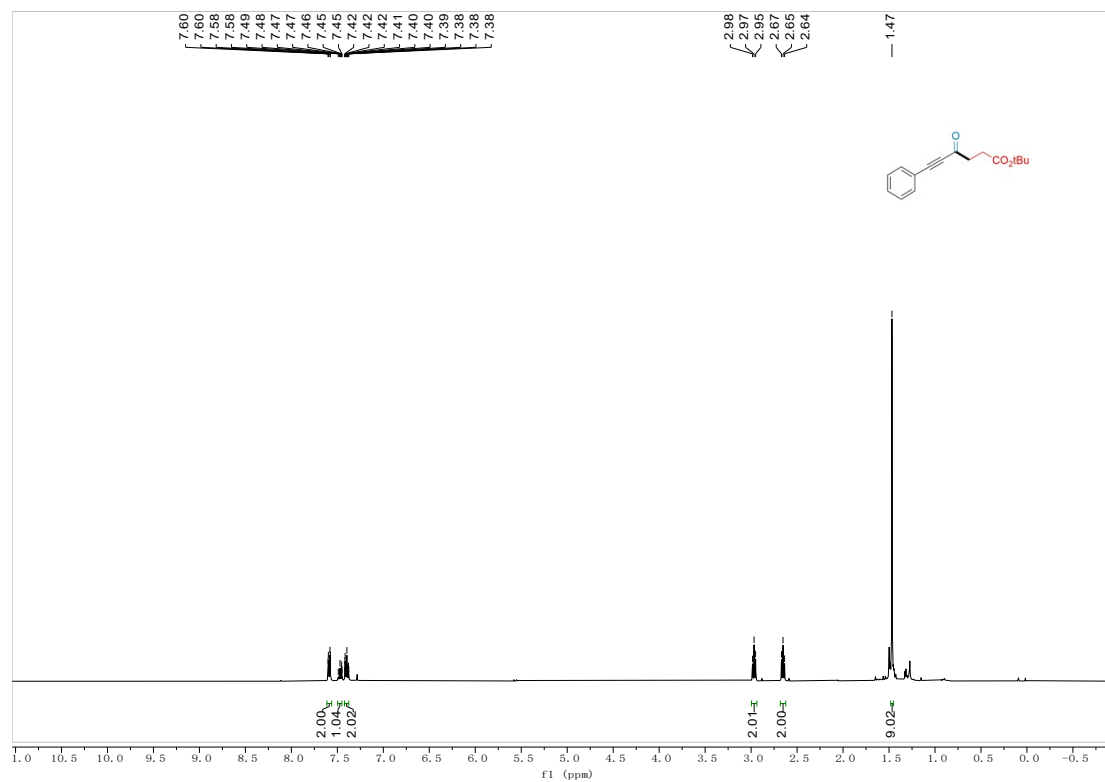

<sup>13</sup>C NMR (100 MHz, CDCl<sub>3</sub>) spectrum of compound **3u**

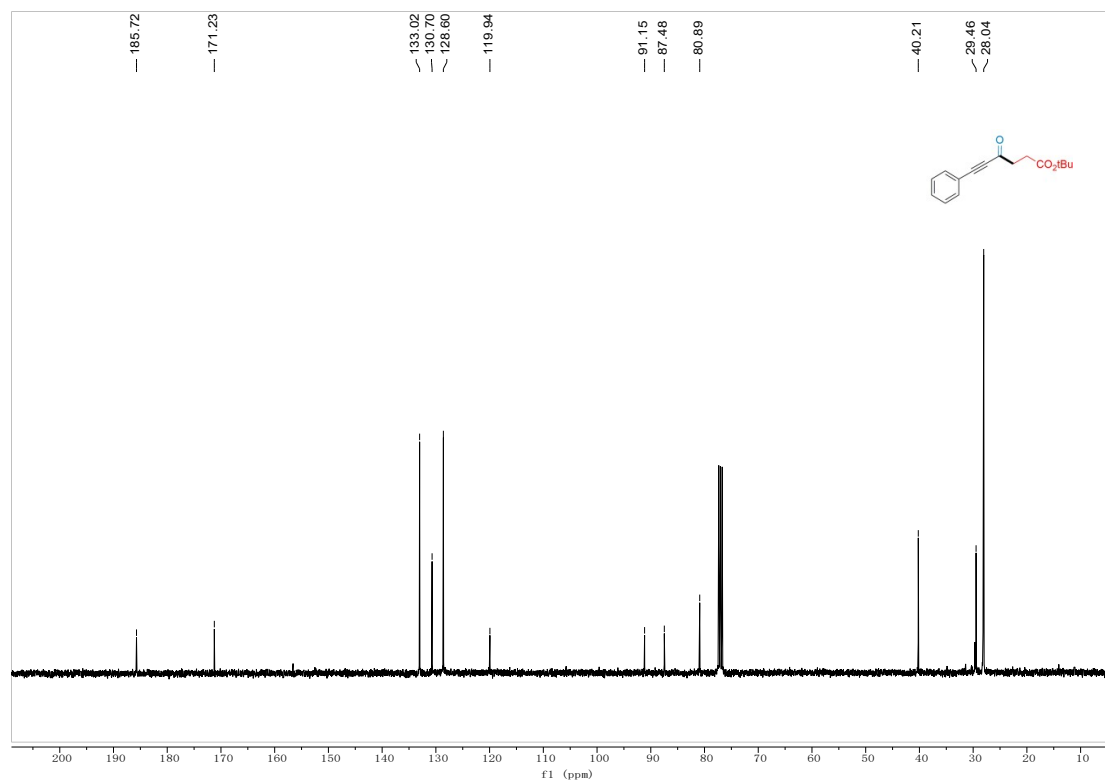

<sup>1</sup>H NMR (400 MHz, CDCl<sub>3</sub>) spectrum of compound 4

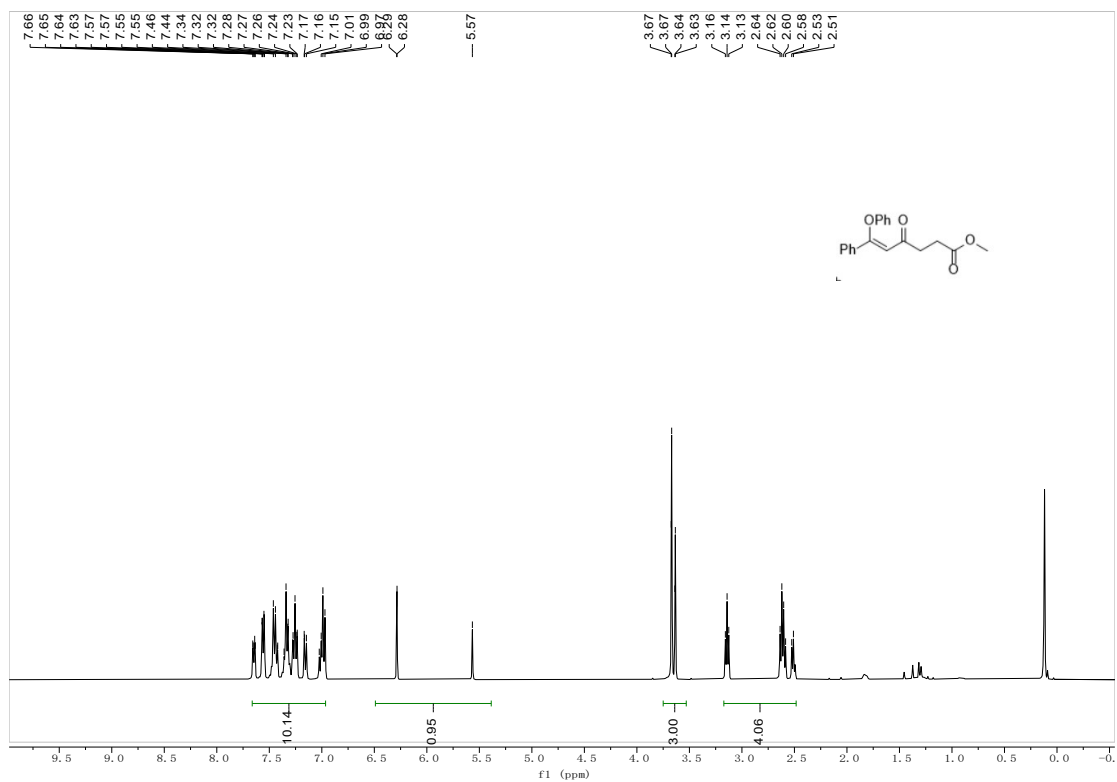

<sup>13</sup>C NMR (100 MHz, CDCl<sub>3</sub>) spectrum of compound 4

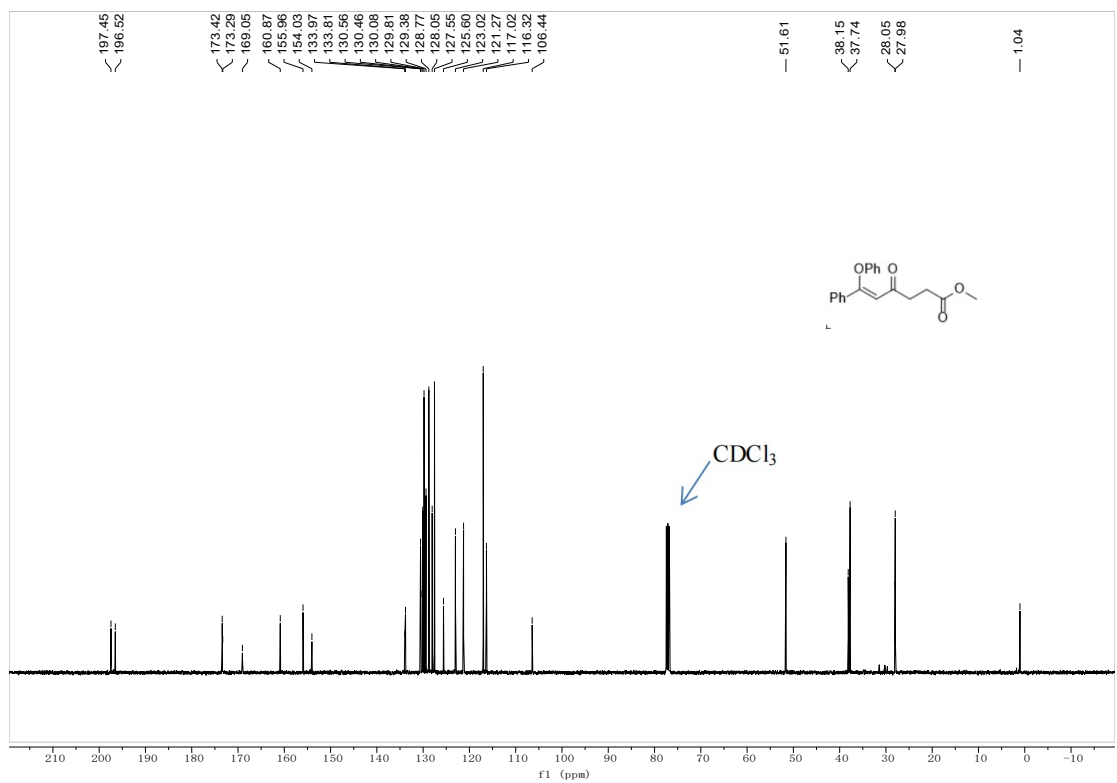

<sup>1</sup>H NMR (400 MHz, CDCl<sub>3</sub>) spectrum of compound **5**

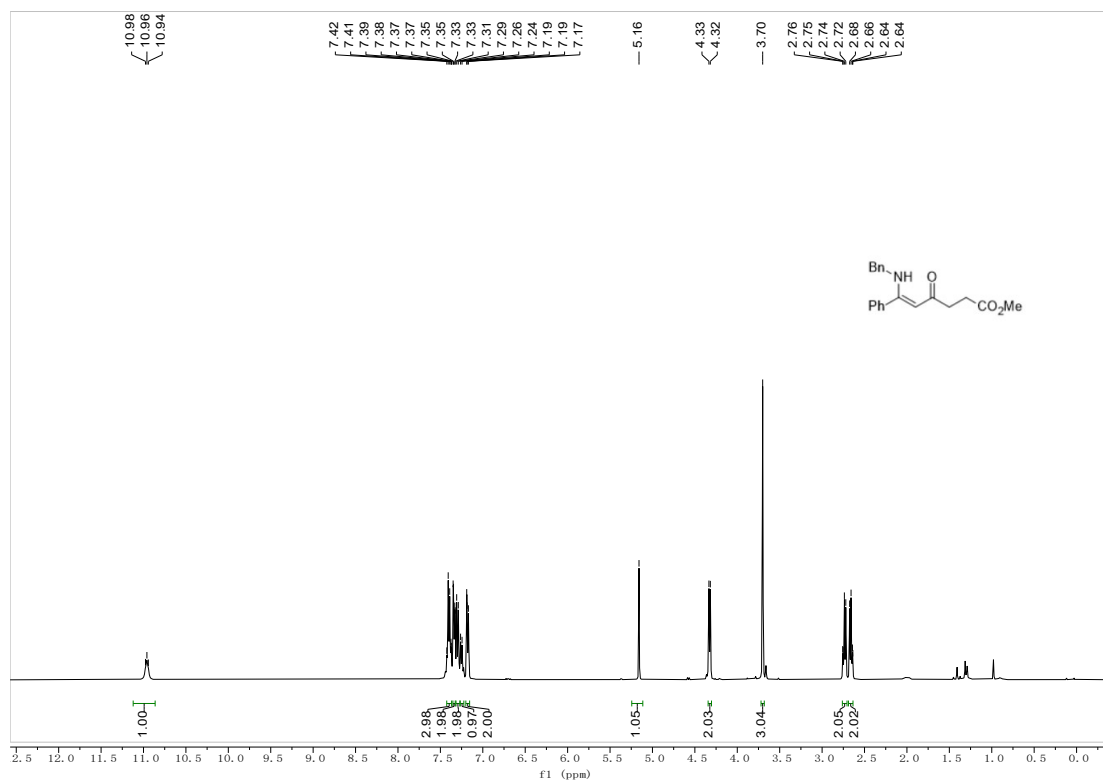

<sup>13</sup>C NMR (100 MHz, CDCl<sub>3</sub>) spectrum of compound **5**

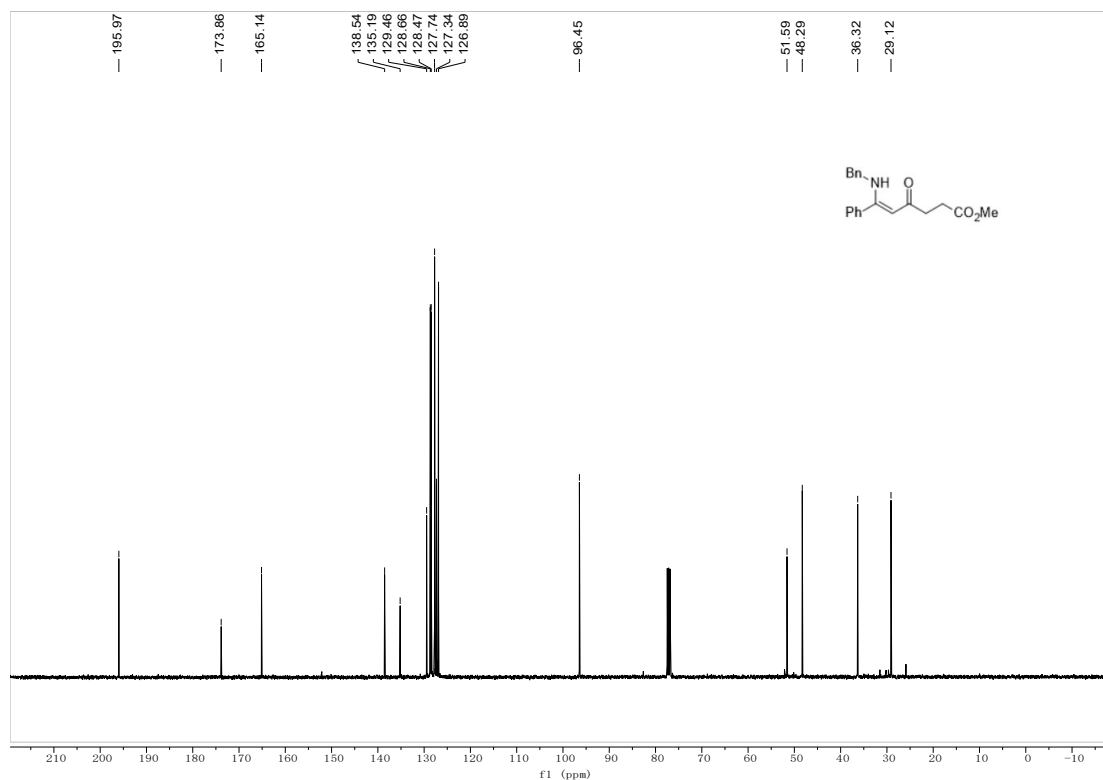

<sup>1</sup>H NMR (400 MHz, CDCl<sub>3</sub>) spectrum of compound **6**

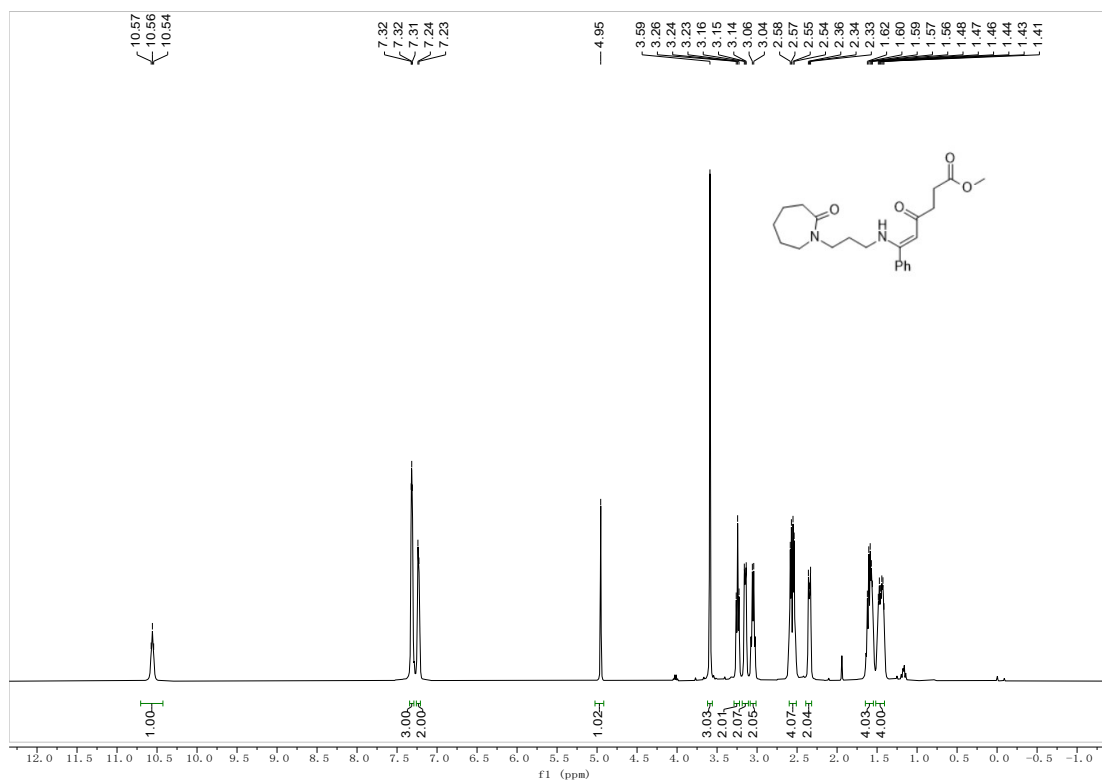

<sup>13</sup>C NMR (100 MHz, CDCl<sub>3</sub>) spectrum of compound **6**

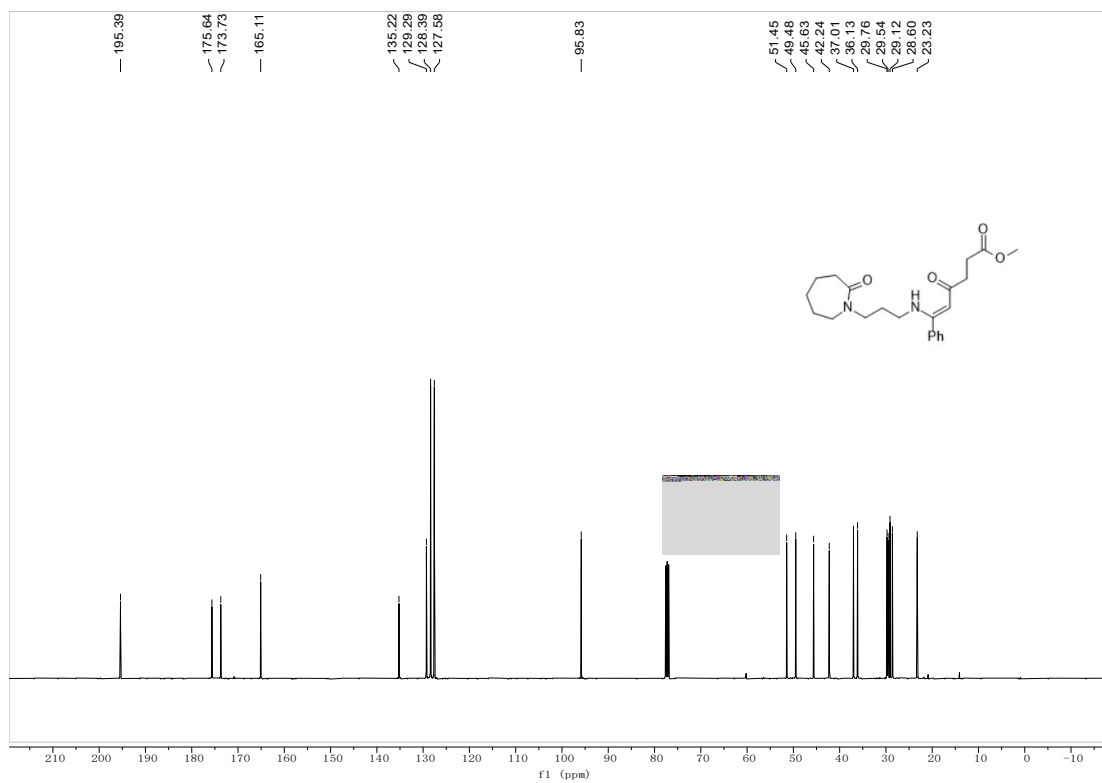

<sup>1</sup>H NMR (400 MHz, CDCl<sub>3</sub>) spectrum of compound 7

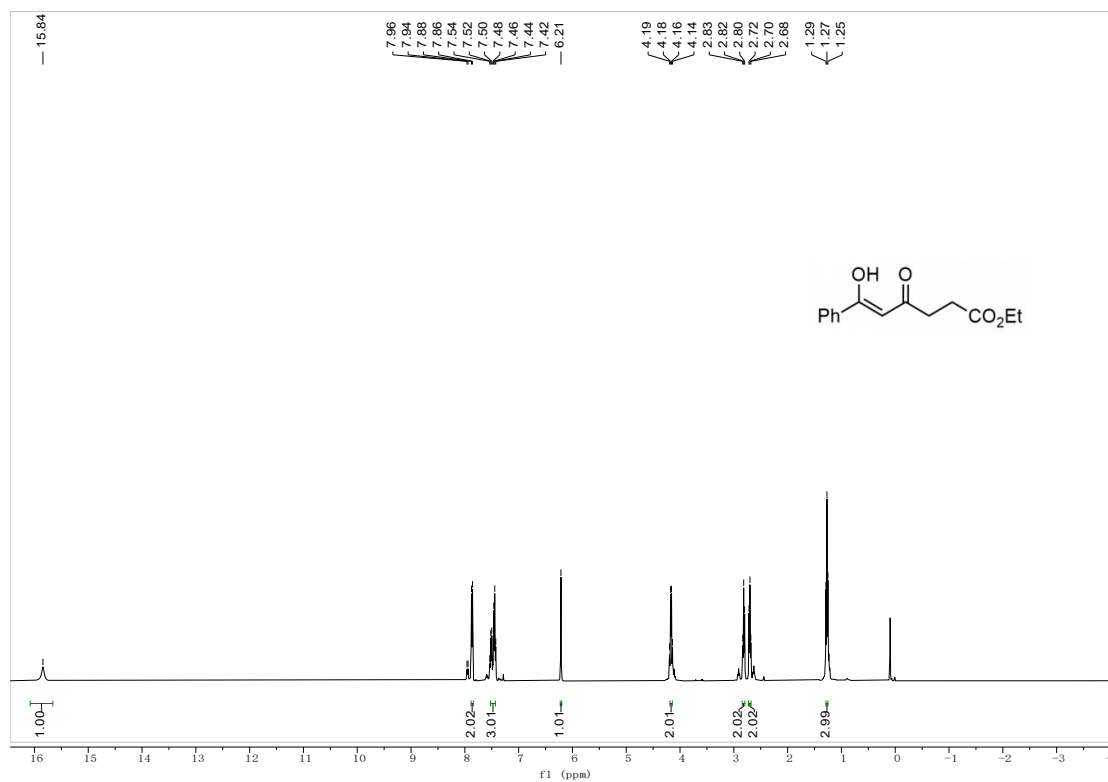

<sup>13</sup>C NMR (100 MHz, CDCl<sub>3</sub>) spectrum of compound 7

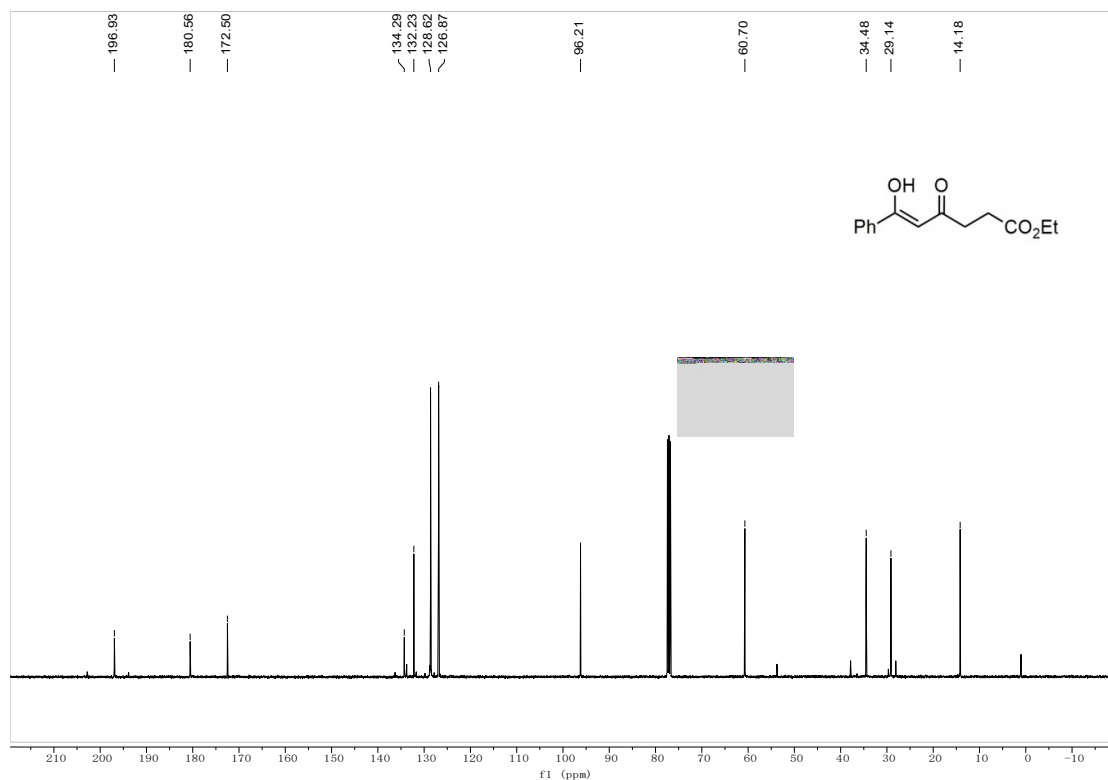



<sup>1</sup>H NMR (400 MHz, CDCl<sub>3</sub>) spectrum of compound **8**

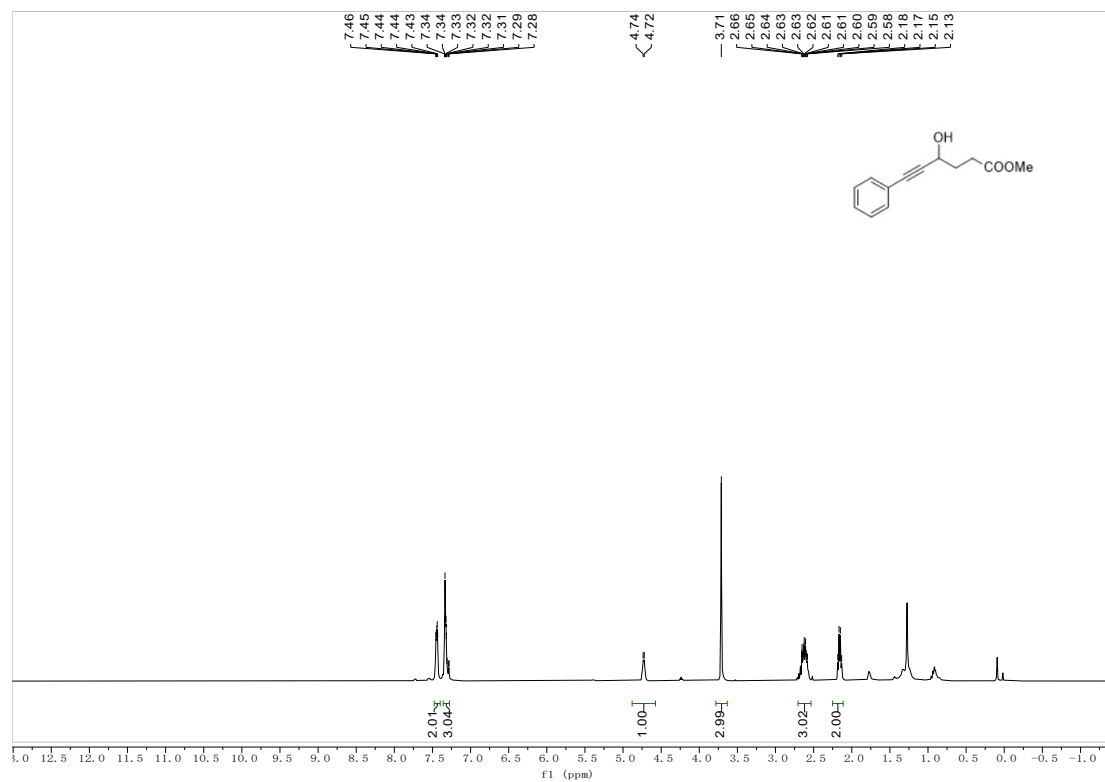

<sup>13</sup>C NMR (100 MHz, CDCl<sub>3</sub>) spectrum of compound **8**

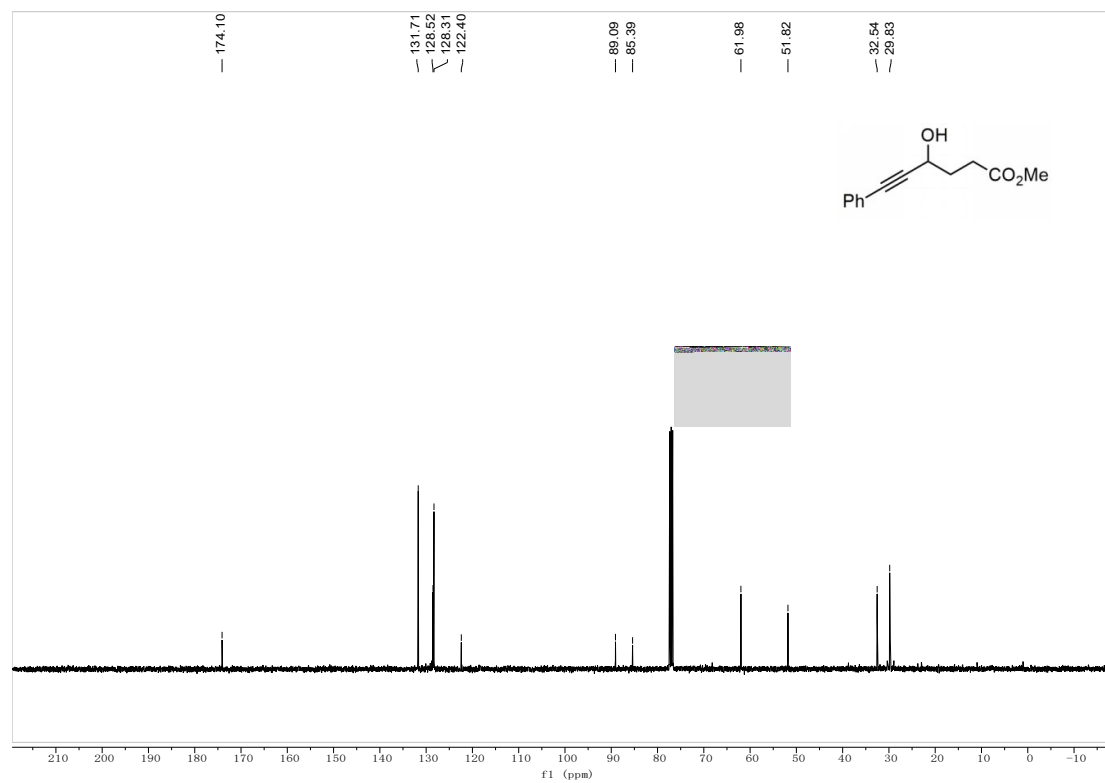

<sup>1</sup>H NMR (400 MHz, CDCl<sub>3</sub>) spectrum of compound **9**

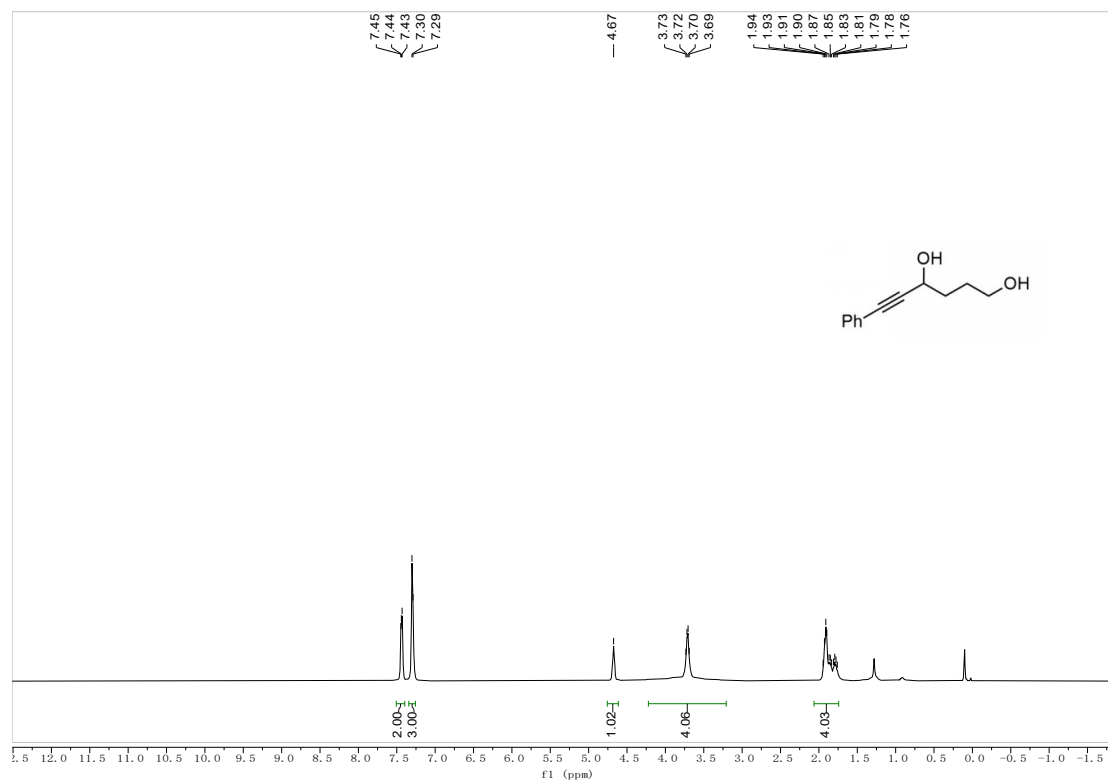

<sup>13</sup>C NMR (100 MHz, CDCl<sub>3</sub>) spectrum of compound **9**

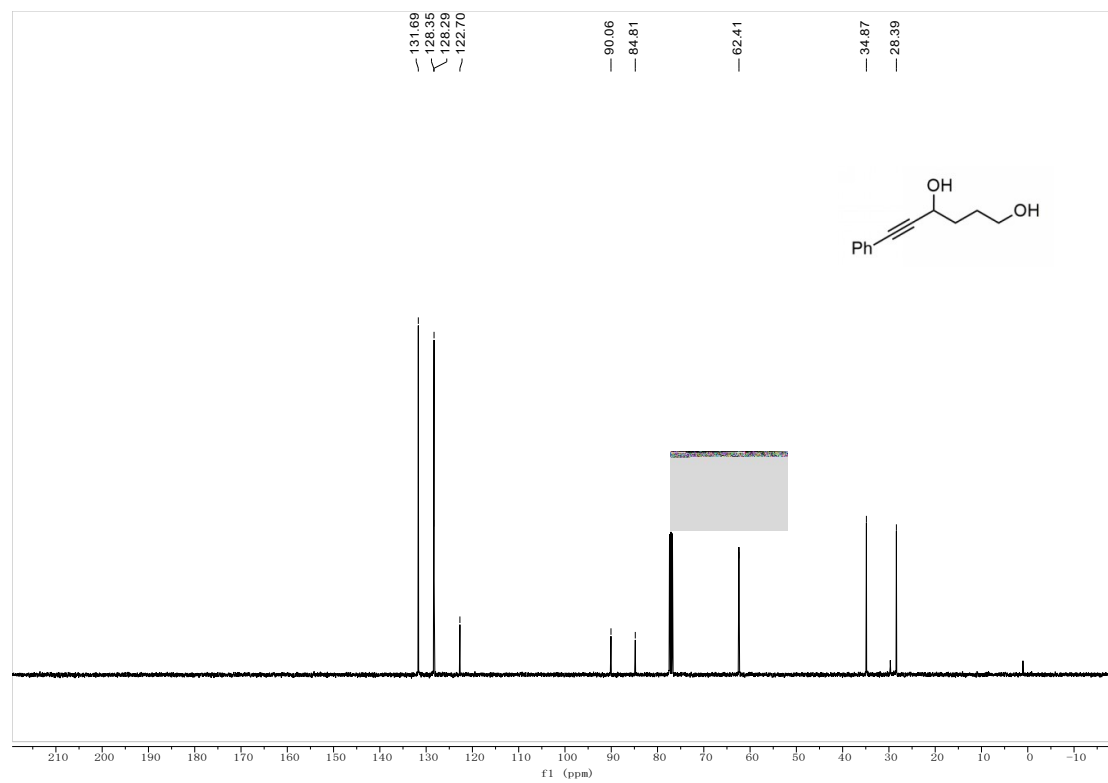

$^1\text{H}$  NMR (400 MHz,  $\text{CDCl}_3$ ) spectrum of compound **10**

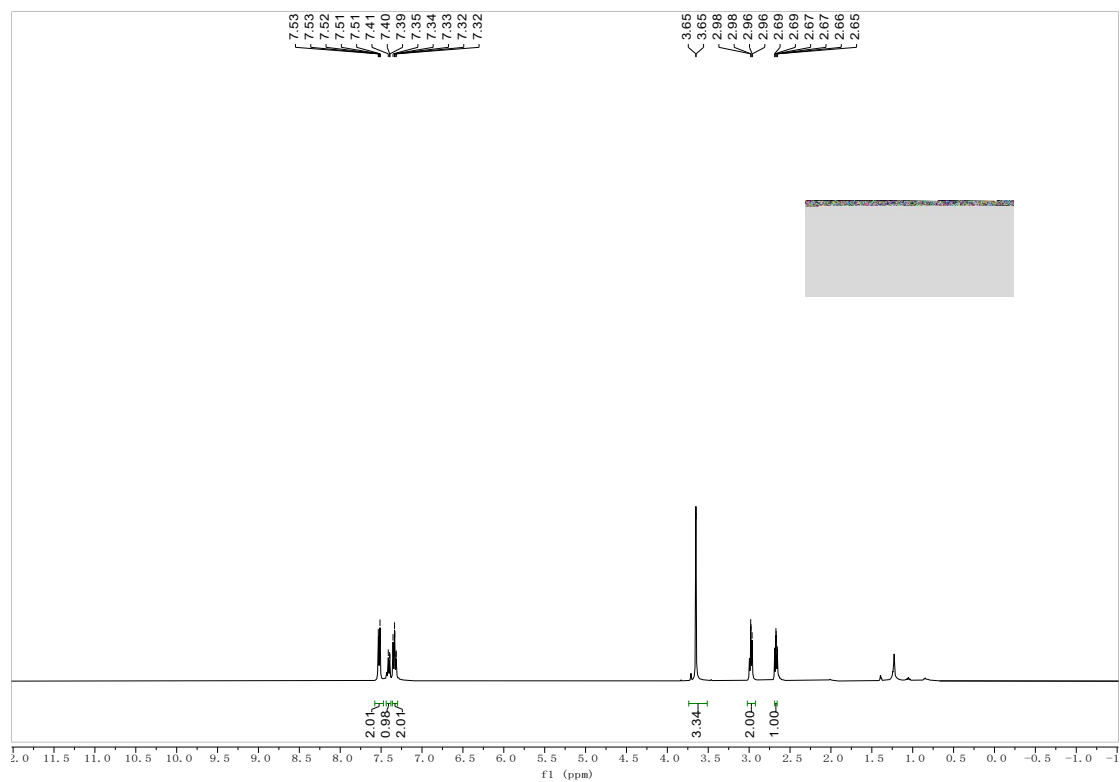

$^1\text{H}$  NMR (400 MHz,  $\text{CDCl}_3$ ) spectrum of compound **11**

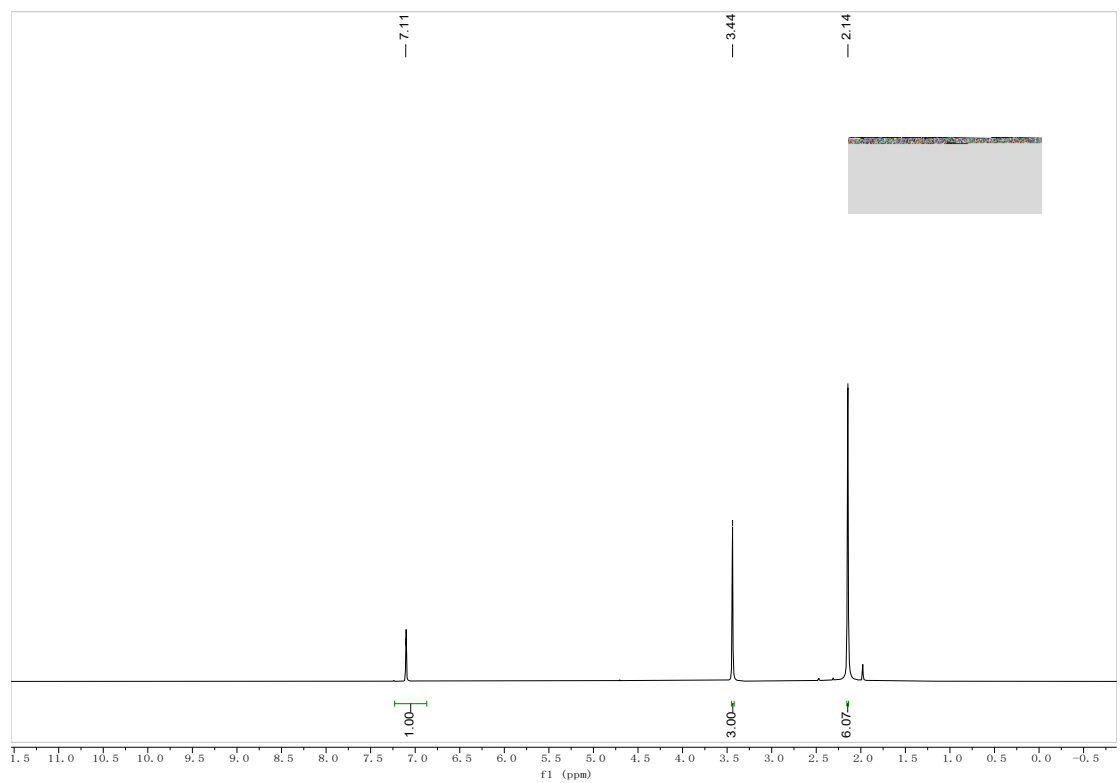

<sup>1</sup>H NMR (400 MHz, CDCl<sub>3</sub>) spectrum of compound **12**

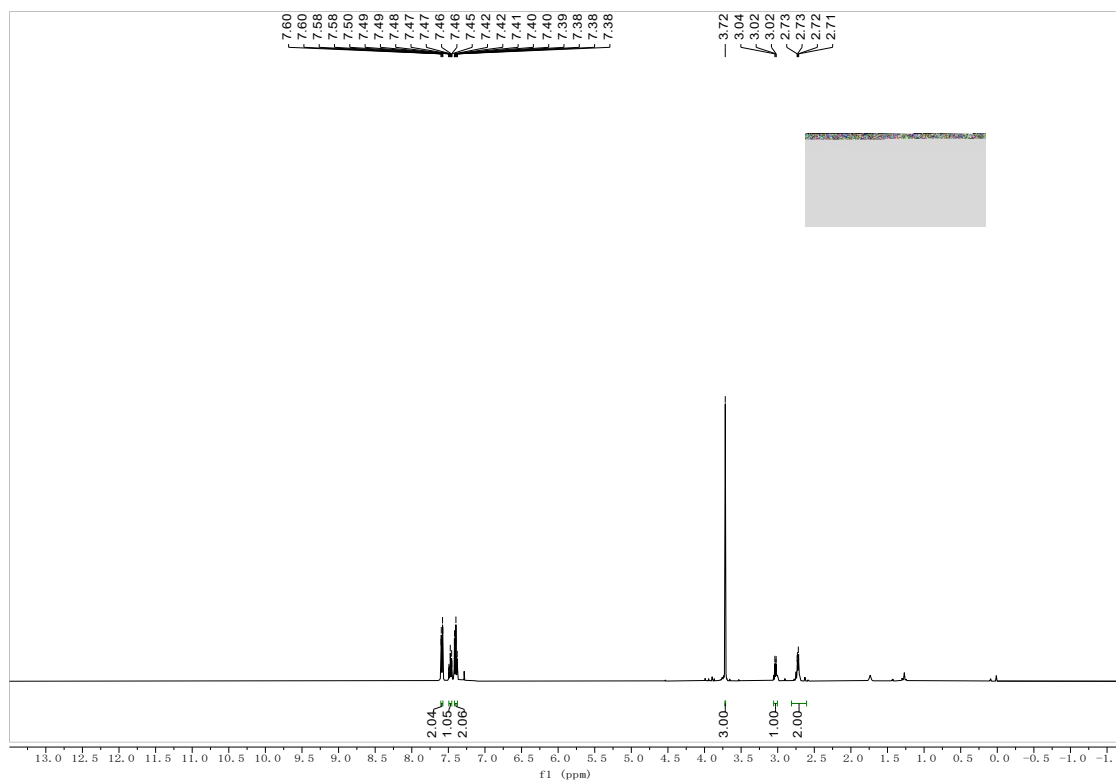

<sup>1</sup>H NMR (400 MHz, CDCl<sub>3</sub>) spectrum of compound **13**

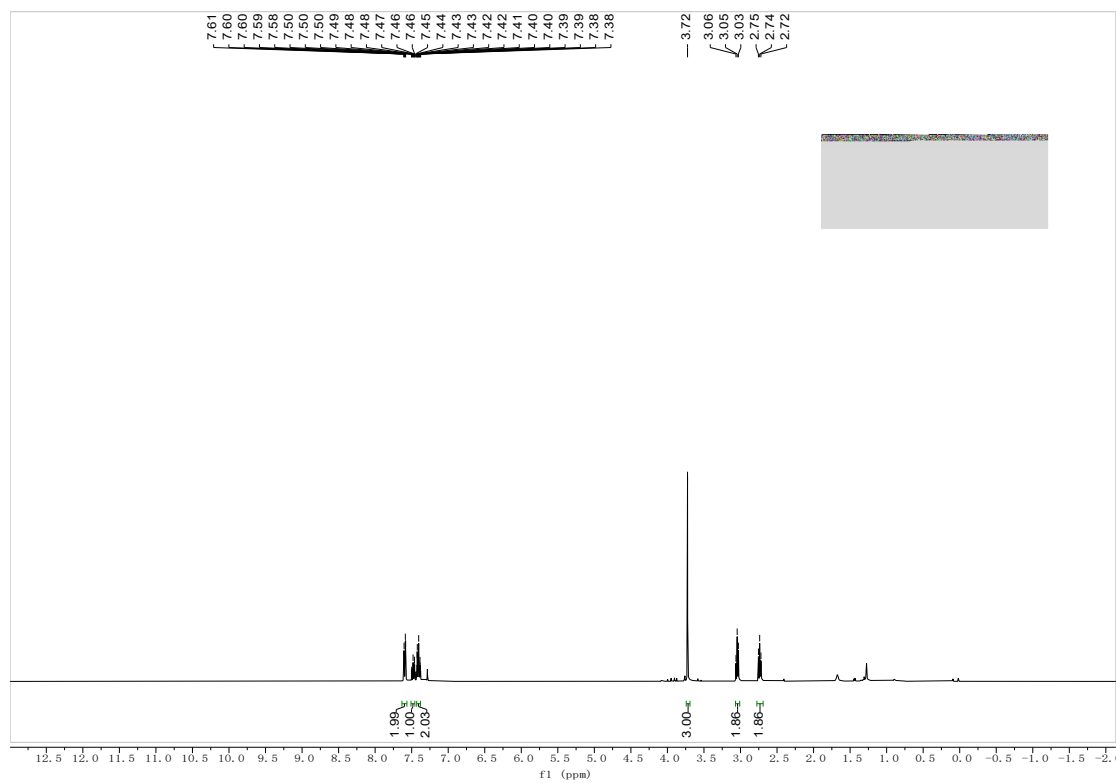

$^1\text{H}$  NMR (400 MHz,  $\text{CDCl}_3$ ) spectrum of compound **14**

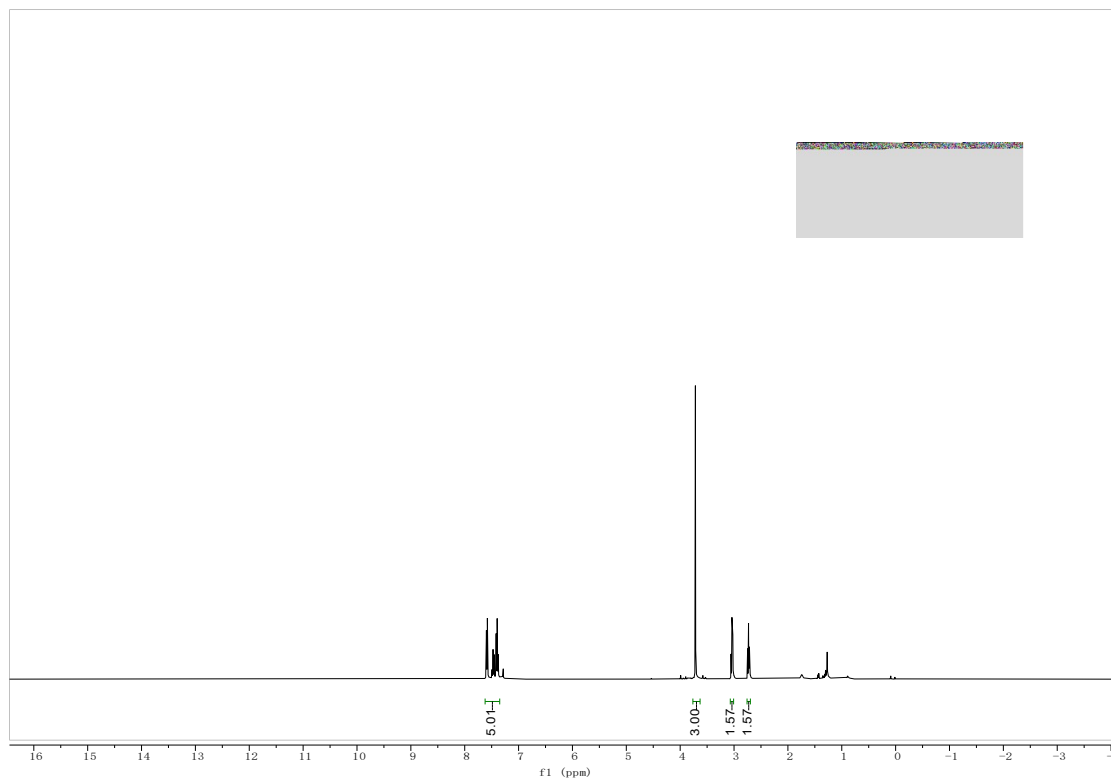

$^1\text{H}$  NMR (400 MHz,  $\text{CDCl}_3$ ) spectrum of compound **15**

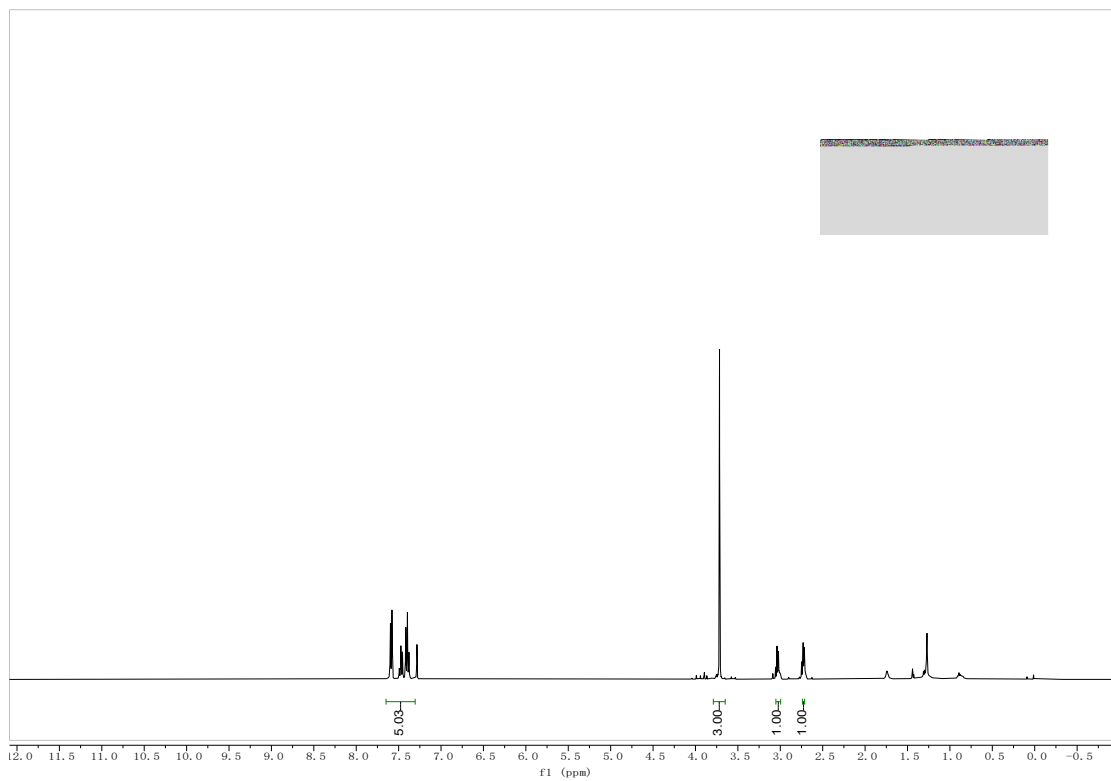

Supplement: d1gc04487g1.pdf [file d1gc04487g1.pdf]
